# Supplementary material for: Gender differences in the association of individual social class and neighbourhood unemployment rate with prevalent type 2 diabetes mellitus: a cross-sectional study from the DIAB-CORE consortium
Source: PubMed Central journal article supplement — BMJ Open. 2013 Jun 21;3(6):e002601. doi: 10.1136/bmjopen-2013-002601 (PMC3693414; doi:10.1136/bmjopen-2013-002601), 2013-06-21
Supplement: bmjopen-2013-002601.draft_revisions.pdf [file bmjopen-2013-002601.draft_revisions.pdf]

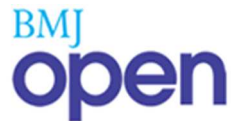

**Gender Differences in The Association of Individual And  
Neighborhood Socio-Economic Factors With Prevalent Type  
2 Diabetes Mellitus: A Cross-sectional Study from The DIAB-  
CORE Consortium**

|                                 |                                                                                                                                                                                                                                                                                                                                                                                                                                                                                                                                                                                                                                                                                                                                                                                                                                                                                                                                                                                                                                                                                                                                                                                                                                                                                                                                                                                                                                                                                                                                             |
|---------------------------------|---------------------------------------------------------------------------------------------------------------------------------------------------------------------------------------------------------------------------------------------------------------------------------------------------------------------------------------------------------------------------------------------------------------------------------------------------------------------------------------------------------------------------------------------------------------------------------------------------------------------------------------------------------------------------------------------------------------------------------------------------------------------------------------------------------------------------------------------------------------------------------------------------------------------------------------------------------------------------------------------------------------------------------------------------------------------------------------------------------------------------------------------------------------------------------------------------------------------------------------------------------------------------------------------------------------------------------------------------------------------------------------------------------------------------------------------------------------------------------------------------------------------------------------------|
| Journal:                        | <i>BMJ Open</i>                                                                                                                                                                                                                                                                                                                                                                                                                                                                                                                                                                                                                                                                                                                                                                                                                                                                                                                                                                                                                                                                                                                                                                                                                                                                                                                                                                                                                                                                                                                             |
| Manuscript ID:                  | bmjopen-2013-002601                                                                                                                                                                                                                                                                                                                                                                                                                                                                                                                                                                                                                                                                                                                                                                                                                                                                                                                                                                                                                                                                                                                                                                                                                                                                                                                                                                                                                                                                                                                         |
| Article Type:                   | Research                                                                                                                                                                                                                                                                                                                                                                                                                                                                                                                                                                                                                                                                                                                                                                                                                                                                                                                                                                                                                                                                                                                                                                                                                                                                                                                                                                                                                                                                                                                                    |
| Date Submitted by the Author:   | 16-Jan-2013                                                                                                                                                                                                                                                                                                                                                                                                                                                                                                                                                                                                                                                                                                                                                                                                                                                                                                                                                                                                                                                                                                                                                                                                                                                                                                                                                                                                                                                                                                                                 |
| Complete List of Authors:       | Müller, Grit; University of Muenster, Institute of Epidemiology and Social Medicine<br>Hartwig, Saskia; Martin-Luther-University Halle-Wittenberg, Institute of Medical Epidemiology, Biostatistics and Informatics<br>Greiser, Karin Halina; Martin-Luther-University Halle-Wittenberg, Institute of Medical Epidemiology, Biostatistics and Informatics; Division of Cancer Epidemiology, German Cancer Research Center<br>Moebus, Susanne; Institute for Medical Informatics, Biometry and Epidemiology, University Hospital of Essen<br>Pundt, Noreen; Institute for Medical Informatics, Biometry and Epidemiology, University Hospital of Essen<br>Schipf, Sabine; Institute for Community Medicine, University Medicine Greifswald<br>Völzke, Henry; Institute for Community Medicine, University Medicine Greifswald<br>Maier, Werner; German Research Center for Environmental Health (GmbH), Institute of Health Economics and Health Care Management, Helmholtz Zentrum München<br>Meisinger, Christa; German Research Center for Environmental Health (GmbH), Institute of Epidemiology II, Helmholtz Zentrum München<br>Tamayo, Teresa; Institute of Biometrics and Epidemiology, German Diabetes Center, Leibniz Center for Diabetes Research at Heinrich-Heine-University<br>Rathmann, Wolfgang; Institute of Biometrics and Epidemiology, German Diabetes Center, Leibniz Center for Diabetes Research at Heinrich-Heine-University<br>Berger, Klaus; University of Muenster, Institute of Epidemiology and Social Medicine |
| <b>Primary Subject Heading</b>: | Epidemiology                                                                                                                                                                                                                                                                                                                                                                                                                                                                                                                                                                                                                                                                                                                                                                                                                                                                                                                                                                                                                                                                                                                                                                                                                                                                                                                                                                                                                                                                                                                                |
| Secondary Subject Heading:      | Diabetes and endocrinology, Epidemiology, Public health                                                                                                                                                                                                                                                                                                                                                                                                                                                                                                                                                                                                                                                                                                                                                                                                                                                                                                                                                                                                                                                                                                                                                                                                                                                                                                                                                                                                                                                                                     |
| Keywords:                       | General diabetes < DIABETES & ENDOCRINOLOGY, EPIDEMIOLOGY, PUBLIC HEALTH                                                                                                                                                                                                                                                                                                                                                                                                                                                                                                                                                                                                                                                                                                                                                                                                                                                                                                                                                                                                                                                                                                                                                                                                                                                                                                                                                                                                                                                                    |
|                                 |                                                                                                                                                                                                                                                                                                                                                                                                                                                                                                                                                                                                                                                                                                                                                                                                                                                                                                                                                                                                                                                                                                                                                                                                                                                                                                                                                                                                                                                                                                                                             |

1  
2  
3  
4  
5  
6  
7  
8  
9  
10  
11  
12  
13  
14  
15  
16  
17  
18  
19  
20  
21  
22  
23  
24  
25  
26  
27  
28  
29  
30  
31  
32  
33  
34  
35  
36  
37  
38  
39  
40  
41  
42  
43  
44  
45  
46  
47  
48  
49  
50  
51  
52  
53  
54  
55  
56  
57  
58  
59  
60

SCHOLARONE™  
Manuscripts

For peer review only

1  
2  
3 **Gender Differences in The Association of Individual And Neighborhood Socio-Economic Factors**  
4 **With Prevalent Type 2 Diabetes Mellitus: A Cross-sectional Study from The DIAB-CORE**  
5 **Consortium**  
6  
7

8  
9 **Short title: Gender Differences in the Association of Socio-Economic Factors With Diabetes**  
10

11  
12 Grit Müller<sup>1</sup>, Saskia Hartwig<sup>2</sup>, Karin Halina Greiser<sup>2,3</sup>, Susanne Moebus<sup>4</sup>, Noreen Pundt<sup>4</sup>, Sabine  
13 Schipf<sup>5</sup>, Henry Völzke<sup>5</sup>, Werner Maier<sup>6</sup>, Christa Meisinger<sup>7</sup>, Teresa Tamayo<sup>8</sup>, Wolfgang Rathmann<sup>8</sup>,  
14 Klaus Berger<sup>1</sup>, for the DIAB-CORE Consortium  
15  
16

17  
18  
19 <sup>1</sup> Institute of Epidemiology and Social Medicine, University of Muenster, Germany

20 <sup>2</sup> Institute of Medical Epidemiology, Biostatistics and Informatics, Martin-Luther-University Halle-  
21 Wittenberg, Halle (Saale), Germany  
22

23 <sup>3</sup> Division of Cancer Epidemiology, German Cancer Research Center (DKFZ), Heidelberg, Germany

24 <sup>4</sup> Institute for Medical Informatics, Biometry and Epidemiology, University Hospital of Essen,  
25 University Duisburg-Essen, Essen, Germany

26 <sup>5</sup> Institute for Community Medicine, University Medicine Greifswald, Greifswald, Germany

27 <sup>6</sup> Helmholtz Zentrum München, German Research Center for Environmental Health (GmbH), Institute  
28 of Health Economics and Health Care Management, Neuherberg, Germany  
29

30 <sup>7</sup> Helmholtz Zentrum München, German Research Center for Environmental Health (GmbH), Institute  
31 of Epidemiology II, Neuherberg, Germany

32 <sup>8</sup> Institute of Biometrics and Epidemiology, German Diabetes Center, Leibniz Center for Diabetes  
33 Research at Heinrich-Heine-University, Düsseldorf, Germany  
34

35  
36 Corresponding author:

37 Address: Grit Mueller  
38 Institute of Epidemiology and Social Medicine  
39 University of Muenster  
40 Domagkstraße 3  
41 48149 Muenster  
42 Germany

43  
44 Email: muellegr@uni-muenster.de

45 Fon: 0049-251-83-55649

46 Fax: 0049-251-83-55300  
47  
48  
49  
50

51 **Keywords:** Type 2 Diabetes mellitus, Gender, Multilevel Analysis, Residence Characteristics,  
52 Socioeconomic Factors, Population-based  
53

54 **Word count: 3067**  
55  
56  
57  
58  
59  
60

**Abstract** (word count: 246; max. 300)

**Objective:** To analyze gender differences in the relationship of individual and neighborhood social factors with present type 2 diabetes mellitus (T2DM).

**Design:** Five cross-sectional studies.

**Setting:** Studies were conducted in five regions of Germany from 1997-2006.

**Participants:** The sample consisted of 8,870 individuals in 226 neighborhoods.

**Primary and secondary outcome measures:** Prevalent T2DM.

**Results:** In the multi-level regression analysis, we found that the gradient in the association of social status and T2DM was stronger in women (odds ratio (OR) low versus high social status: 2.18 (95% confidence intervals (CI): 1.34-3.55)) than men (OR low versus high: 1.48 (95% CI: 1.01-2.17)). A statistically significant interaction was estimated between gender and social status: Men with low social status had the highest chance of T2DM in comparison to high social status women (OR: 4.37 (95% CI: 2.65-7.21)). For women, being not employed as compared to being employed constituted an increased chance of T2DM (OR of T2DM in unemployed: 1.83 (95% CI: 1.18-2.85); OR in retired: 1.77 (95% CI: 1.04-3.02); OR in others: 1.73 (95% CI: 1.06-2.83)). Neighborhood unemployment rate was associated with T2DM prevalence in men (OR highest versus lowest tertile: 1.46 (95% CI: 1.14-1.88)). Regional variation in the T2DM prevalence was more pronounced in women. Variation was explained by explanatory variables in men, but not in women.

**Conclusions:** Being a man of low social status yielded a markedly increased chance of T2DM; however, in general, the prevalence of T2DM in women was more affected by social determinants.

## Article Summary

### Article focus

- The aim of this study is to examine disparities in the association of individual and neighborhood social determinants with prevalent T2DM by gender in a pooled analysis of five population-based regional studies.

### Key messages

- The association between the socio-economic status and T2DM is stronger in women than in men, particularly the individual employment status is an important determinant of T2DM in women.
- Spatial variation in T2DM is more pronounced in women, as already observed for obesity.
- Neighborhood unemployment rate is only associated with T2DM in men.

### Strength and limitations of this study

- Data of five population-based representative studies linking data on the prevalence of T2DM to small areas and regions were applied.
- This study adds knowledge to the research on the interaction of gender, social determinants on different levels and health.
- Limitations are as follows: The cross-sectional design does not allow causal conclusions; T2DM was based on a self-reported physician's diagnosis; Administrative definitions of neighborhoods could result in exposure misclassification and underestimation of neighborhood effects; Problem of residential selection.

**List of Abbreviations**

|           |                                                                |
|-----------|----------------------------------------------------------------|
| CARLA     | Cardiovascular Disease, Living and Ageing in Halle Study       |
| CI        | Confidence Interval                                            |
| DHS       | Dortmund Health Study                                          |
| DIAB-CORE | Diabetes Collaborative Research of Epidemiologic Studies       |
| HNR       | Heinz Nixdorf Recall Study                                     |
| KORA S4   | Cooperative Health Research in the Region of Augsburg Survey 4 |
| MOR       | Median Odds Ratio                                              |
| OR        | Odds Ratio                                                     |
| SD        | Standard Deviation                                             |
| SE        | Standard Error                                                 |
| SHIP      | Study of Health in Pomerania                                   |
| T2DM      | Type 2 Diabetes Mellitus                                       |
| $V_A$     | Area-Level Variance                                            |

## Introduction

Gender differences in health inequality vary by the studied health outcome, the measure of social status and the stage of life course [1-4]. Studies concerning type 2 diabetes mellitus (T2DM) mainly found a stronger relationship between the socio-economic status and T2DM in women than in men [5-10]. Beyond an individual's social status, the residential environment is a potential source of social and material deprivation that affects health [11-13]. As part of the Diabetes Collaborative Research of Epidemiologic Studies (DIAB-CORE) in Germany, Schipf et al. reported regional disparities in the age-standardized prevalence of T2DM [14]. In two recent studies, we found that the prevalence of T2DM varied across regions in Germany, even after adjustment for individual characteristics. These variations could in part be explained by neighborhood unemployment rate within cities or by regional deprivation [15, 16].

Gender differences may arise out of different exposures to social, psychosocial and behavioral determinants of health and characteristics of the residential environment ("differential exposure hypothesis") [3, 17]. Another explanation might be a different vulnerability to health determinants, characteristics of the residential environment and reaction to material, behavioral and psychosocial conditions of men and women ("differential vulnerability hypothesis") [3, 17]. Differences in men's and women's perception of residential environment and social status may be as well a source of disparities. Stafford et al. examined gender differences in the relationship between self-rated health and the neighborhood context. The residential environment had a larger impact on the health of women [17].

The aim of this study was (1) to investigate if the association of individual and neighborhood social determinants with prevalent T2DM differs for men and women in a pooled analysis of five population-based regional studies; (2) to examine the extent to which the prevalence of T2DM varies by gender between neighborhoods and regions in Germany; and (3), to assess the pattern of gender differences across regions in a study-stratified analysis.

## Methods

Within the DIAB-CORE, cross-sectional data of five regional studies were pooled: the Cardiovascular Disease, Living and Ageing in Halle Study (CARLA), the Dortmund Health Study (DHS), the Heinz Nixdorf Recall Study (HNR), the Cooperative Health Research in the Region of Augsburg (KORA) S4 Study, and the Study of Health in Pomerania (SHIP). Data collection was conducted between 1997 and 2006. The studies have similar study designs (population-based), sampling procedures (two-stage cluster or stratified random sampling) and response proportions (56%-69%). All participants gave written informed consent. Within the five studies, similar instruments, questionnaires and medical measurements were applied to collect data. Study designs have been described elsewhere in more detail [18-22].

In brief, data on 11,688 subjects aged 45-74 years were provided. 2,281 individuals living in rural areas of KORA and SHIP were excluded from the sample because of missing data on the neighborhood level. Study participants were assigned to neighborhoods via addresses of residence at baseline (eight subjects could not be linked). The neighborhoods were defined by administrative units: statistical administrative units (subdivision of city districts) in HNR and DHS, city districts in CARLA, planning regions (summary of city districts) in KORA and postal code areas in SHIP. The 9,399 study participants of the sample resided in 227 neighborhoods of the total 236 neighborhoods in the five study regions. After further exclusion of participants with missing information on the individual characteristics (missing information on social status or employment status n=520), the final sample consisted of 8,870 individuals in 226 neighborhoods.

Based on the definition of the DIAB-CORE Consortium [23], a T2DM case was defined as self-reported physician-diagnosed T2DM or self-reported diabetes treatment (insulin, oral anti-diabetic agents, dietary treatment). Subjects reporting an age at diagnosis of 30 years or younger were excluded from the analyses to avoid inclusion of possible cases of type 1 diabetes.

Social status was based on a summary score of the net household income and educational attainment derived from a modified version of the Winkler-Index of Socioeconomic Status and divided into three groups (high; medium; or low) [24]. We differentiated between four employment status groups:



1  
2  
3 employed, retired and unemployed individuals as well as persons with other forms of employment, for  
4 example housewives. Among the marital status of the study participants, it was only known whether  
5 one lived with or without a partner. The dichotomized lifestyle variables smoking status (current  
6 smoker; former or never smoker), physical exercise (exercise; no exercise), measured body mass index  
7 (BMI) ( $<30 \text{ kg/m}^2$ ;  $\geq 30 \text{ kg/m}^2$ ) and alcohol consumption (no or moderate intake: women:  $\leq 20$   
8 grams per day; men:  $\leq 40$  grams per day; high intake: women:  $>20$  grams per day; men:  $>40$  grams  
9 per day) were summarized in an index of health-related behavior. Exercising included any exercise  
10 irrespective of frequency and duration. The lifestyle index was categorized: most healthy (no risk  
11 factor), healthy (one risk factor), less healthy (two risk factors), unhealthy (three risk factors) and most  
12 unhealthy (four risk factors). All variables were constructed following DIAB-CORE standard  
13 procedures for the homogenization of basic variables to ensure a high degree of comparability.

14  
15 Individual level data were combined with data on neighborhood unemployment rate for the median  
16 year of the data collection period of each study, obtained from the statistical offices of each considered  
17 city. Neighborhood unemployment rate was calculated as the number of unemployed residents in  
18 relation to the working-age population (15-64 years of age) and was used to define the socio-economic  
19 status of neighborhoods, since it is considered to be a strong predictor of health outcomes [21, 25, 26].  
20 Equally-sized tertiles of study-specific neighborhood unemployment rate were used for further  
21 analysis.  
22  
23  
24  
25  
26  
27  
28  
29  
30  
31  
32  
33  
34  
35  
36  
37  
38  
39  
40

41 Crude and age-adjusted prevalence of T2DM (derived from a logistic regression) and corresponding  
42 95% confidence intervals (CI) were calculated by gender and socio-economic variables. A series of  
43 mixed effects logistic regression models was fitted. The models were adjusted for age, gender (if not  
44 stratified), social status, employment status, lifestyle and neighborhood unemployment rate. Gender-  
45 stratified regressions were modeled and regional and between-neighborhood variation in the  
46 prevalence of T2DM of men and women calculated. In addition, we estimated models including terms  
47 for gender and the socio-economic variables (social status, employment status and neighborhood  
48 unemployment rate) as main effects and an interaction term for the effect of the socio-economic  
49  
50  
51  
52  
53  
54  
55  
56  
57  
58  
59  
60

1  
2  
3 variable by gender taking the whole sample. The results were presented as odds ratios (OR) with  
4  
5 corresponding 95% CI.

6  
7 Our data set had the following hierarchical structure: individuals (level 1), nested within  
8  
9 neighborhoods (level 2), which were nested in study regions (level 3). Random effects were included  
10  
11 to capture regional (between-study) and between-neighborhood variation reported as median odds  
12  
13 ratios (MOR). The latter represents a transformation of the area-level variation ( $V_A$ ) on an OR-scale.  
14  
15 The MOR gives the median value of all ORs between a randomly chosen highest- and lowest-risk-  
16  
17 area. The MOR was calculated on the level of neighborhoods and study regions with the following  
18  
19 equation:  $MOR = \exp(\sqrt{(2 * V_A)} * 0.6745)$ , where 0.6745 is the 75<sup>th</sup> centile of the cumulative  
20  
21 distribution function of the normal distribution with mean zero and variance one [27, 28].  
22  
23

24  
25 Study-specific analyses were performed and analyzed with meta-analytical tools. Due to the small  
26  
27 number of cases, the social status variable had to be applied as a continuous measure in this sub-  
28  
29 analysis (ranging between two points, highest social status, and 14 points, lowest social status). For  
30  
31 this purpose, inverse-variance weighting was used to estimate fixed and random effects summary  
32  
33 estimates and displayed in forest plots [29]. Q-statistic and  $I^2$  index were applied to assess  
34  
35 heterogeneity and the extent of heterogeneity between study results respectively [30]. Analyses were  
36  
37 performed in STATA/ SE 11.0.  
38  
39

## 40 **Results**

41  
42 In total, 8,870 subjects residing in 226 neighborhoods in five German regions were included in our  
43  
44 analysis. Characteristics of the five studies are displayed in table 1. The crude T2DM prevalence was  
45  
46 statistically significantly lower among women than men, 7.5% (95% CI 6.7-8.3) versus 10.0% (95%  
47  
48 CI 9.2-10.9) (significance derived from 95% CI). This pattern was observed in all five regional  
49  
50 studies. Demographic, social and lifestyle characteristics are reported in table 2. Women were more  
51  
52 often of low and medium social status and not employed than men, except in SHIP. Men, in contrast,  
53  
54 had more often an unhealthy life style. A higher proportion of women than men reported living  
55  
56 without a partner.  
57  
58  
59  
60

1  
2  
3 *Social status:* The age-adjusted prevalence of T2DM was statistically significantly lower in women  
4 and men of high social status (4.7% (95% CI: 3.9-5.7) versus 9.7% (95% CI: 8.2-11.4) in low social  
5 status women; 6.9% (95% CI: 5.9-8.1) versus 14.1% (95% CI: 11.8-16.7) in low social status men)  
6  
7 (table 3). Women had a statistically significantly lower age-adjusted T2DM prevalence than men over  
8  
9 all social status groups. The social gradient in the chance of T2DM was stronger in women (OR in low  
10 versus high social status: 2.18 (95% CI: 1.34-3.55); OR in medium versus high social status: 1.85  
11 (95% CI: 1.19-2.87)) than men (OR in low versus high social status: 1.48 (95% CI: 1.01-2.17); OR in  
12 medium versus high social status: 1.04 (95% CI: 0.81-1.32)) (table 4).

13  
14  
15  
16  
17  
18  
19 The interaction terms of the social status categories and gender were statistically significant in the  
20 fully adjusted regression model (gender\*low social status: coefficient (coef.): -0.62 (95% CI: -1.18- -  
21 0.05); gender\*medium social status: coef.: -0.75 (95% CI: -1.22- -0.27)). For women, the OR of  
22 T2DM was 2.86 (95% CI: 1.83-4.51) in the low versus high social status group and 2.20 (95% CI:  
23 1.44-3.37) in the medium versus high social status group (figure 1). Compared to women of high  
24 social status, high social status men had an OR of 2.83 (95% CI: 1.83-4.38) and medium and low  
25 status men an OR of 2.96 (95% CI: 1.94-4.50) and 4.37 (2.65-7.21), respectively.

26  
27  
28  
29  
30  
31  
32  
33 Regarding gender differences in health inequalities across regions, the effect estimates of the five  
34 studies were tested to be homogenous (figure 2, online supplement). A low social status was  
35 associated with a higher chance of T2DM, adjusted for age, employment status, marital status and  
36 neighborhood unemployment rate. In women, an increase of one point on the social status score  
37 (decrease in social status) was associated with an increase of 13% (pooled OR: 1.13 (95% CI: 1.06-  
38 1.21);  $I^2=14.0\%$ ;  $p=0.325$ ) in the chance of having T2DM. This association was smaller in men  
39 (pooled OR: 1.05 (95% CI: 1.00-1.10);  $I^2=0.0\%$ ;  $p=0.543$ ), although the differences between genders  
40 were not significant. This was observed in all studies, except CARLA.

41  
42  
43  
44  
45  
46  
47  
48  
49  
50  
51  
52  
53  
54  
55  
56  
57  
58  
59  
60  
*Employment status:* Employed men (7.3% (95% CI: 6.2-8.7)) had a statistically significantly lower  
age-adjusted T2DM prevalence than retired men (10.2% (95% CI: 8.8-11.7)) (table 3). In the gender-  
stratified regression analysis, significant associations between employment status and T2DM were  
only found in women (OR in unemployed versus employed: 1.83 (95% CI: 1.18-2.85); OR in retired

1  
2  
3 versus employed: 1.77 (95% CI: 1.04-3.02); OR in others versus employed: 1.73 (95% CI: 1.06-2.83))  
4  
5 (table 4).

6  
7 The interaction terms between the categories unemployed as well as retired and gender were  
8  
9 statistically significant in the fully adjusted model (gender\*unemployed: coef.: -0.72 (95% CI: -1.14- -  
10  
11 0.31); gender\*retired: coef.: -0.78 (95% CI: -1.43- -0.12)). Being unemployed, retired or a housewife  
12  
13 constituted an increased chance of T2DM in women (OR in unemployed: 2.07 (95% CI: 1.38-3.11);  
14  
15 OR in retired: 1.90 (95% CI: 1.13-3.18); OR in others: 1.67 (95% CI: 1.06-2.65)) (results not shown).  
16  
17 Compared to employed women, employed, unemployed and retired men showed an elevated chance of  
18  
19 having T2DM (OR in employed: 2.70 (1.86-3.91); OR in unemployed: 2.71 (95% CI: 1.82-4.04); OR  
20  
21 in retired: 2.35 (95% CI: 1.44-3.83); OR others: 4.84 (95% CI: 1.74-13.47)).  
22

23 *Neighborhood unemployment rate:* Women and men residing in neighborhoods with a high  
24  
25 unemployment rate had a significantly higher prevalence of T2DM (8.3% (95% CI: 7.2-9.5),  
26  
27 respectively 10.9% (95% CI: 9.6-12.3)) than women and men in areas with low unemployment rate  
28  
29 (5.6% (95% CI: 4.8-6.6), respectively 7.4% (95% CI: 6.4-8.6)). Neighborhood unemployment rate was  
30  
31 statistically significantly associated with the prevalence of T2DM in men (OR of highest versus lowest  
32  
33 tertile: 1.46 (95% CI: 1.14-1.88)), while such an association was not observed in women (table 4). The  
34  
35 interaction terms between neighborhood unemployment rate and gender were not statistically  
36  
37 significant.  
38

39 Regional (between-study) variation and between-neighborhood variation in the prevalence of T2DM  
40  
41 was larger in women than men. The prevalence of T2DM in men varied only between study regions  
42  
43 (model without covariates: MOR: 1.21;  $V_A$ : 0.04; SE: 0.04), which was fully explained by social  
44  
45 status, employment status, lifestyle and neighborhood unemployment rate. The T2DM prevalence in  
46  
47 women showed large variation across neighborhoods (model without covariates: MOR: 1.47;  $V_A$ :  
48  
49 0.16; SE: 0.10) and study regions (MOR: 1.31;  $V_A$ : 0.08; SE: 0.07), which was not dissolved by the  
50  
51 considered explanatory variables (fully adjusted model, between-neighborhood variation: MOR: 1.42;  
52  
53  $V_A$ : 0.14; SE: 0.09, between-study variation: MOR: 1.32;  $V_A$ : 0.08; SE: 0.07).  
54  
55

56 Individuals living without a partner showed statistically significantly higher prevalence than  
57  
58 individuals who lived with a partner irrespective of gender. In women and men, an unhealthy life style  
59  
60

1  
2  
3 was statistically significantly associated with a higher T2DM prevalence (table 3). In the gender-  
4 stratified regression models, the adjustment for life style reduced the social gradient in the prevalence  
5 of T2DM in both women and men (results not shown). The association between life style and the  
6 prevalence of T2DM was stronger in women than men (e.g. OR of unhealthy lifestyle versus most  
7 healthy lifestyle in women: 5.06 (95% CI: 3.06-8.37); OR of unhealthy lifestyle versus most healthy  
8 lifestyle in men 2.84 (95% CI: 1.85-4.35)).  
9  
10  
11  
12  
13  
14  
15  
16  
17  
18

### 19 Discussion

20  
21 This study assessed gender differences in the association of individual and neighborhood social factors  
22 with prevalent T2DM, using data from five regional population-based studies in Germany. Women  
23 and men with a low social status had a higher prevalence of T2DM, however men with a low social  
24 status had the highest chance of T2DM as compared to all other gender-social class subgroups. We  
25 found that the gradient in the prevalence of T2DM across social status groups was clearly stronger in  
26 women than men. This pattern was consistent across all regions but one (CARLA) and with prior  
27 studies [5-10]. Robbins et al. reported a significant association between social status and T2DM  
28 among Caucasian and African American women but an inconsistent relationship in men, using data  
29 from the Third National Health and Nutrition Examination Survey [10].  
30  
31  
32  
33  
34  
35  
36  
37  
38

39 In our study, the individual employment status only had an impact on the chance of T2DM in women.  
40 Being unemployed, retired or a housewife yielded a higher chance of T2DM. Publications on the  
41 effects of paid employment on women's health discuss two contrasting theories for this finding: a  
42 health promoting function of employment due to role accumulation in contrast to the monotony,  
43 isolation, low status and self-esteem of housewives; and a health damaging effect due to role strains,  
44 e.g. stress due to multiple roles, and heavy job demands [31, 32]. Arber et al. found that paid work was  
45 beneficial for women without children or women over 40 years of age with children in Britain.  
46 Younger women with children experienced higher levels of illnesses and substantial strains from  
47 holding multiple roles [31]. Repetti et al. argues that the social support provided by colleagues has  
48 beneficial effects on women's health and helps buffering stress [32].  
49  
50  
51  
52  
53  
54  
55  
56  
57  
58  
59  
60

1  
2  
3 Regional and between-neighborhood variation in the prevalence of T2DM was larger in women than  
4 in men. We found that neighborhood unemployment rate played an important role in explaining  
5 regional health differences in men but not in women. Hence, we conclude that the residential  
6 environment is more important for the onset of T2DM in women than men. Previous work on regional  
7 variation in self-rated health and BMI also found larger regional variation in women [17, 33, 34].  
8  
9

10  
11 The gender-specific pattern in the association between socio-economic status and the prevalence of  
12 T2DM need to be further explored, since the pathways are still unknown [10]. Macintyre et al. noted  
13 that socio-economic determinants vary in their meaning for men and women, since both genders are  
14 socialized in different ways with diverging social roles and coping strategies against stress; they hold  
15 different occupational positions in the labor market and have dissimilar access to material and psycho-  
16 social resources [35]. In our study, overall women were less likely to be of high social status, were less  
17 often employed, lived more often alone but were more often engaged in a favorable lifestyle than men.  
18  
19  
20  
21  
22  
23  
24  
25  
26  
27  
28

29 To gain more insight in mechanisms of social inequalities on health, the analysis of population  
30 subgroups is essential, since one limitation of the existing literature is the assumption that mechanisms  
31 operate identically in different population groups [17]. This work adds knowledge to the research on  
32 the interaction of gender, social determinants and health. So far, only few studies examined this  
33 interaction with regard to T2DM and no prior study considered socio-economic characteristics of the  
34 neighborhood. Data sources providing representative population-based data on the prevalence of  
35 T2DM with a linkage to small areas and regions are still rare.  
36  
37  
38  
39  
40  
41  
42  
43

44 Some limitations of this work should be acknowledged. We analyzed cross-sectional data analyses  
45 with limited causal conclusions. We could not use occupation as an indicator of social status in our  
46 analysis since the assessment was not comparable between studies. The prevalence of T2DM was  
47 based on a self-reported T2DM physician's diagnosis only. However, Okura et al. found a high  
48 accuracy between self-reports and medical records for diabetes and other chronic diseases [36].  
49 Another potential limitation is the selection by response (response proportions: 56%-69%), which  
50 might have affected our results.  
51  
52  
53  
54  
55  
56  
57  
58  
59  
60

1  
2  
3 We used administrative definitions for neighborhoods. Hence, neighborhoods in our study may not  
4 capture the immediate residential environment of our study participants. This could lead to exposure  
5 misclassification and underestimation of neighborhood effects [37]. The applied administrative  
6 definition of neighborhoods differed between studies and neighborhoods were diverse according to  
7 their area and population size. Another challenge in the research of neighborhood impact on health is  
8 the residential selection. Individuals may be selected into neighborhoods due to their individual  
9 characteristics, such as residents of poor areas cannot afford moving to better-off neighborhoods [38,  
10 39]. Finally, we had no information on the residential history of the studies' participants, which could  
11 result in an underestimation of neighborhood effects on health [40].  
12  
13  
14  
15  
16  
17  
18  
19  
20  
21  
22

23 In conclusion, our study identified different relationships of individual and neighborhood  
24 unemployment rate with the prevalence of T2DM for women and men. While being a man of low  
25 social status yielded the highest chance of T2DM, the social gradient in the prevalence of T2DM was  
26 clearly larger in women. Regional variance in the T2DM prevalence was larger in women than men.  
27 Whereas the major proportion of the variance in the T2DM prevalence remained unexplained in  
28 women, the regional variance in men was low and completely explained by individual and contextual  
29 socio-economic variables.  
30  
31  
32  
33  
34  
35  
36  
37  
38  
39  
40  
41  
42  
43  
44  
45  
46  
47  
48  
49  
50  
51  
52  
53  
54  
55  
56  
57  
58  
59  
60

Table 1: Characteristics of The Five Studies (CARLA, DHS, KORA, HNR, and SHIP studies, 1997-2006)<sup>a</sup>

|                                           | CARLA                      | DHS                                 | KORA                       | HNR                                  | SHIP                                   |
|-------------------------------------------|----------------------------|-------------------------------------|----------------------------|--------------------------------------|----------------------------------------|
| Federal State (Region)                    | Saxony-Anhalt (east)       | North Rhine-Westphalia (west)       | Bavaria (south)            | North Rhine-Westphalia (west)        | Mecklenburg-West Pomerania (northeast) |
| Sampling                                  | stratified random sampling | stratified random sampling          | two-stage cluster sampling | stratified random sampling           | two-stage cluster sampling             |
| Cities                                    | Halle (Saale)              | Dortmund                            | Augsburg                   | Bochum, Essen, Mülheim               | Greifswald, Stralsund                  |
| Neighborhoods (n)                         | 43 city districts          | 62 statistical administrative units | 17 planning regions        | 108 statistical administrative units | 6 clusters of city districts           |
| Corresponding year                        | 2003                       | 2003                                | 2000                       | 2000/ 2001                           | 1999 (2003)                            |
| Total population (neighborhood range)     | 238,078 (18 - 19,210)      | 587,607 (476 - 25,686)              | 252,725 (2,730 - 37,246)   | 1,142,112 (262 - 32,466)             | 115,962 (5,230 - 31,154)               |
| Unemployment rate (%; neighborhood range) | 14.1 (3.9 - 22.5)          | 15.3 (5.0 - 27.7)                   | 4.8 (1.9 - 7.6)            | 7.5 (1.7 - 13.5)                     | 13.1 (9.9 - 14.9)                      |

<sup>a</sup> the Cardiovascular Disease, Living and Ageing in Halle Study (CARLA), the Dortmund Health Study (DHS), the Heinz Nixdorf Recall Study (HNR), the Cooperative Health Research in the Region of Augsburg (KORA) S4 Study, and the Study of Health in Pomerania (SHIP)



Table 2: Demographic, Social And Lifestyle Characteristics of Men And Women in The Five Population-Based Studies (CARLA, DHS, KORA, HNR, SHIP, Germany, 1997-2006)<sup>a</sup>

| Study period<br>Number of neighborhoods (range<br>of residing participants) | CARLA<br>12/2002-01/2006<br>37 (3-139) |                     | DHS<br>09/2003-06/2004<br>60 (1-42) |                    | KORA<br>10/1999-04/2001<br>17 (13-141) |                   | HNR<br>12/2000-06/2003<br>106 (1-140) |                   | SHIP<br>10/1997-03/2001<br>6 (95-396) |                    |
|-----------------------------------------------------------------------------|----------------------------------------|---------------------|-------------------------------------|--------------------|----------------------------------------|-------------------|---------------------------------------|-------------------|---------------------------------------|--------------------|
|                                                                             | Men                                    | Women               | Men                                 | Women              | Men                                    | women             | men                                   | women             | men                                   | women              |
| Participants aged 45-74 with full<br>information (n)                        | 719                                    | 638                 | 414                                 | 411                | 532                                    | 494               | 2,257                                 | 2,175             | 615                                   | 615                |
| Crude diabetes prevalence (%)<br>(95% CI)                                   | 12.9 (10.6-<br>15.6)                   | 12.1 (9.6-<br>14.9) | 11.8 (8.9-<br>15.3)                 | 7.8 (5.4-<br>10.8) | 6.95 (4.9-<br>9.5)                     | 5.5 (3.6-<br>7.9) | 8.9 (7.8-<br>10.2)                    | 5.9 (5.0-<br>7.0) | 11.7 (9.3-<br>14.5)                   | 9.6 (7.4-<br>12.2) |
| Mean age (SD)                                                               | 61.0 (8.0)                             | 60.4 (7.8)          | 60.9 (8.4)                          | 59.7 (8.5)         | 58.9 (8.6)                             | 58.8 (8.4)        | 59.5 (7.8)                            | 59.4 (7.8)        | 60.3 (8.3)                            | 58.8 (8.3)         |
| Social status (%)                                                           |                                        |                     |                                     |                    |                                        |                   |                                       |                   |                                       |                    |
| Low                                                                         | 7.4                                    | 13.0                | 11.1                                | 23.8               | 5.8                                    | 16.4              | 6.2                                   | 19.7              | 12.2                                  | 26.0               |
| medium                                                                      | 61.3                                   | 65.1                | 46.1                                | 46.2               | 48.5                                   | 54.1              | 53.0                                  | 55.9              | 67.3                                  | 63.1               |
| High                                                                        | 31.3                                   | 21.9                | 42.8                                | 29.9               | 45.7                                   | 29.6              | 40.9                                  | 24.4              | 20.5                                  | 10.9               |
| Employment status (%)                                                       |                                        |                     |                                     |                    |                                        |                   |                                       |                   |                                       |                    |
| Employed                                                                    | 34.9                                   | 30.6                | 38.7                                | 34.8               | 50.4                                   | 35.0              | 46.4                                  | 31.9              | 33.3                                  | 35.1               |
| Unemployed                                                                  | 48.1                                   | 52.0                | 51.9                                | 33.8               | 42.9                                   | 39.3              | 47.6                                  | 37.4              | 54.0                                  | 49.6               |
| Retired                                                                     | 15.2                                   | 12.4                | 7.3                                 | 6.1                | 6.4                                    | 8.9               | 5.7                                   | 7.5               | 12.4                                  | 14.5               |
| Others                                                                      | 1.8                                    | 5.0                 | 2.2                                 | 25.3               | 0.4                                    | 16.8              | 0.3                                   | 23.3              | 0.3                                   | 0.8                |
| Marital status (%)                                                          |                                        |                     |                                     |                    |                                        |                   |                                       |                   |                                       |                    |
| Living with a partner                                                       | 89.0                                   | 73.4                | 86.7                                | 71.5               | 82.5                                   | 67.2              | 90.2                                  | 74.7              | 88.3                                  | 68.8               |
| Living without a partner                                                    | 11.0                                   | 26.7                | 13.3                                | 28.5               | 17.5                                   | 32.8              | 9.8                                   | 25.3              | 11.7                                  | 31.2               |
| Lifestyle Index <sup>b</sup> (%)                                            |                                        |                     |                                     |                    |                                        |                   |                                       |                   |                                       |                    |
| most healthy lifestyle                                                      | 9.6                                    | 20.1                | 12.8                                | 19.5               | 16.2                                   | 26.1              | 15.1                                  | 18.7              | 6.5                                   | 22.6               |
| healthy lifestyle                                                           | 24.5                                   | 40.4                | 32.6                                | 38.2               | 37.8                                   | 39.5              | 39.2                                  | 44.1              | 34.6                                  | 38.5               |
| less healthy lifestyle                                                      | 41.5                                   | 29.8                | 37.2                                | 33.6               | 32.3                                   | 28.3              | 33.6                                  | 28.5              | 38.5                                  | 29.6               |
| unhealthy lifestyle                                                         | 22.4                                   | 9.6                 | 15.0                                | 7.5                | 10.7                                   | 5.3               | 9.2                                   | 5.3               | 18.7                                  | 8.3                |
| most unhealthy lifestyle                                                    | 2.0                                    | 0.2                 | 1.5                                 | 0.7                | 1.9                                    | 0.2               | 1.0                                   | /                 | 1.3                                   | 0.7                |

<sup>a</sup> the Cardiovascular Disease, Living and Ageing in Halle Study (CARLA), the Dortmund Health Study (DHS), the Heinz Nixdorf Recall Study (HNR), the Cooperative Health Research in the Region of Augsburg (KORA) S4 Study, and the Study of Health in Pomerania (SHIP)

1  
2  
3  
4  
5  
6  
7  
8  
9  
10  
11  
12  
13  
14  
15  
16  
17  
18  
19  
20  
21  
22  
23  
24  
25  
26  
27  
28  
29  
30  
31  
32  
33  
34  
35  
36  
37  
38  
39  
40  
41  
42  
43  
44  
45  
46  
47  
48  
49

<sup>b</sup> dichotomized lifestyle variables: smoking status (current smoker; former or never smoker), physical exercise (exercise; no exercise), measured body mass index (BMI) (<30 kg/m<sup>2</sup>; >=30 kg/m<sup>2</sup>) and alcohol consumption (no or moderate intake: women: <=20 grams per day; men: <=40 grams per day; high intake: women: >20 grams per day; men: >40 grams per day)

For peer review only

Table 3: Gender-Stratified Crude And Age-Adjusted Prevalence of Type 2 Diabetes by Individual And Neighborhood Socio-Demographic Variables With Data From Five Population-Based Studies (CARLA, DHS, KORA, HNR, SHIP, Germany, 1997-2006) <sup>a, b</sup>

| Individual Characteristics         | Men  |            |                    |           |                       |           | Women |            |                    |           |                       |           |
|------------------------------------|------|------------|--------------------|-----------|-----------------------|-----------|-------|------------|--------------------|-----------|-----------------------|-----------|
|                                    | No.  | T2DM Cases | Crude Prevalence % | 95% CI    | Adjusted Prevalence % | 95% CI    | No.   | T2DM Cases | Crude Prevalence % | 95% CI    | Adjusted Prevalence % | 95% CI    |
| <b>Social status</b>               |      |            |                    |           |                       |           |       |            |                    |           |                       |           |
| low                                | 345  | 56         | 16.2               | 12.5-20.6 | 14.1                  | 11.8-16.7 | 851   | 104        | 12.2               | 10.1-14.6 | 9.7                   | 8.2-11.4  |
| middle                             | 2499 | 267        | 10.7               | 9.5-12.0  | 9.7                   | 8.7-10.8  | 2475  | 194        | 7.8                | 6.8-9.0   | 6.6                   | 5.8-7.5   |
| high                               | 1693 | 129        | 7.6                | 6.4-9.0   | 6.9                   | 5.9-8.1   | 1007  | 26         | 2.6                | 1.7-3.8   | 4.7                   | 3.9-5.7   |
| <b>Employment status</b>           |      |            |                    |           |                       |           |       |            |                    |           |                       |           |
| employed                           | 1931 | 126        | 6.5                | 5.5-7.7   | 7.3                   | 6.2-8.7   | 1420  | 39         | 2.8                | 2.0-3.7   | 5.5                   | 4.6-6.7   |
| unemployed                         | 2196 | 289        | 13.2               | 11.8-14.7 | 10.3                  | 8.0-13.2  | 1783  | 213        | 12.0               | 10.5-13.5 | 7.9                   | 6.0-10.2  |
| retired                            | 378  | 32         | 8.5                | 5.9-11.7  | 10.2                  | 8.8-11.7  | 399   | 26         | 6.5                | 4.3-9.4   | 7.8                   | 6.6-9.1   |
| others                             | 32   | 5          | 15.6               | 5.3-32.8  | 8.7                   | 6.4-11.6  | 731   | 46         | 6.3                | 4.6-8.3   | 6.6                   | 5.0-8.6   |
| <b>Marital status</b>              |      |            |                    |           |                       |           |       |            |                    |           |                       |           |
| Living with a partner              | 4016 | 387        | 9.6                | 8.7-10.6  | 8.7                   | 7.9-9.5   | 3141  | 199        | 6.3                | 5.5-7.2   | 6.2                   | 5.5-7.0   |
| Living without a partner           | 521  | 65         | 12.5               | 9.8-15.6  | 11.5                  | 9.7-13.4  | 1192  | 125        | 10.5               | 8.8-12.4  | 8.3                   | 7.1-9.6   |
| <b>Life style</b>                  |      |            |                    |           |                       |           |       |            |                    |           |                       |           |
| most healthy                       | 589  | 32         | 5.4                | 3.8-7.6   | 4.3                   | 3.3-5.5   | 882   | 31         | 3.5                | 2.4-5.0   | 3.6                   | 2.8-4.7   |
| healthy                            | 1610 | 123        | 7.6                | 6.4-9.1   | 7.1                   | 6.1-8.2   | 1806  | 126        | 7.0                | 5.8-8.3   | 6.1                   | 5.2-7.0   |
| less healthy                       | 1619 | 189        | 11.7               | 10.2-13.3 | 10.1                  | 8.9-11.4  | 1270  | 112        | 8.8                | 7.3-10.5  | 8.7                   | 7.5-10.0  |
| unhealthy                          | 602  | 98         | 16.3               | 13.4-19.5 | 15.3                  | 13.0-17.9 | 284   | 44         | 15.5               | 11.5-20.2 | 13.3                  | 11.0-15.9 |
| most unhealthy                     | 60   | 6          | 10.0               | 3.8-20.5  | 9.7                   | 4.7-19.2  | 9     | 1          | 11.1               | 2.8-48.3  | 8.4                   | 3.9-16.9  |
| <b>Neighborhood Characteristic</b> |      |            |                    |           |                       |           |       |            |                    |           |                       |           |
| <b>Unemployment rate</b>           |      |            |                    |           |                       |           |       |            |                    |           |                       |           |
| low                                | 1519 | 125        | 8.2                | 6.9-9.7   | 7.4                   | 6.4-8.6   | 1384  | 85         | 6.1                | 4.9-7.5   | 5.6                   | 4.8-6.6   |
| mid                                | 1578 | 143        | 9.1                | 7.7-10.6  | 8.6                   | 7.5-9.9   | 1527  | 120        | 7.9                | 6.6-9.3   | 6.5                   | 5.6-7.6   |
| high                               | 1440 | 184        | 12.8               | 11.1-14.6 | 10.9                  | 9.6-12.3  | 1422  | 119        | 8.4                | 7.0-9.9   | 8.3                   | 7.2-9.5   |

1  
2  
3  
4  
5  
6  
7  
8  
9  
10  
11  
12  
13  
14  
15  
16  
17  
18  
19  
20  
21  
22  
23  
24  
25  
26  
27  
28  
29  
30  
31  
32  
33  
34  
35  
36  
37  
38  
39  
40  
41  
42  
43  
44  
45  
46  
47  
48  
49

<sup>a</sup> the Cardiovascular Disease, Living and Ageing in Halle Study (CARLA), the Dortmund Health Study (DHS), the Heinz Nixdorf Recall Study (HNR), the Cooperative Health Research in the Region of Augsburg (KORA) S4 Study, and the Study of Health in Pomerania (SHIP)

<sup>b</sup> Age-adjusted prevalence are derived from logistic regression models in the whole sample

For peer review only

Table 4: Gender-Stratified Multi-Level Logistic Regression of Type 2 Diabetes by Individual Social Factors and Neighborhood Unemployment Rate<sup>a, b, c</sup>

|                                                             | <b>Men</b>       | <b>Women</b>      |
|-------------------------------------------------------------|------------------|-------------------|
|                                                             | OR (95% CI)      | OR (95% CI)       |
| <b>Age (cont.)</b>                                          | 1.05 (1.03-1.07) | 1.06 (1.03-1.08)  |
| <b>Social status (Reference: high social status)</b>        |                  |                   |
| medium social status                                        | 1.04 (0.81-1.32) | 1.85 (1.19-2.87)  |
| low social status                                           | 1.48 (1.01-2.17) | 2.18 (1.34-3.55)  |
| <b>Employment status (Reference: employed)</b>              |                  |                   |
| unemployed                                                  | 1.06 (0.75-1.49) | 1.83 (1.18-2.85)  |
| retired                                                     | 0.92 (0.60-1.41) | 1.77 (1.04-3.02)  |
| others                                                      | 1.85 (0.69-4.96) | 1.73 (1.06-2.83)  |
| <b>Marital status (Reference: living with a partner)</b>    |                  |                   |
| Living without a partner                                    | 1.21 (0.90-1.62) | 1.18 (0.91-1.53)  |
| <b>Lifestyle Index (Ref.: most healthy lifestyle)</b>       |                  |                   |
| healthy lifestyle                                           | 1.35 (0.90-2.02) | 2.06 (1.37-3.11)  |
| less healthy lifestyle                                      | 2.03 (1.37-3.00) | 2.68 (1.76-4.07)  |
| unhealthy lifestyle                                         | 2.84 (1.85-4.35) | 5.06 (3.06-8.37)  |
| most unhealthy lifestyle                                    | 1.81 (0.72-4.57) | 5.13 (0.57-46.48) |
| <b>Neighborhood Characteristic</b>                          |                  |                   |
| <b>Unemployment rate (Reference: low unemployment rate)</b> |                  |                   |
| medium unemployment rate                                    | 1.08 (0.83-1.39) | 1.30 (0.92-1.83)  |
| high unemployment rate                                      | 1.46 (1.14-1.88) | 1.08 (0.75-1.54)  |
| <b>Level 2: Neighborhoods n</b>                             | 219              | 223               |
| VA                                                          | 0.00 (0.12)      | 0.32 (0.15)       |
| Median Odds Ratio                                           | 1.00             | 1.35              |
| <b>Level 3: Study Regions n</b>                             | 5                | 5                 |
| VA                                                          | 0.00 (0.07)      | 0.28 (0.12)       |
| Median Odds Ratio                                           | 1.00             | 1.30              |

<sup>a</sup> Odds Ratios and 95% Confidence Intervals derived from Three-Level Mixed Effects Logistic Regression Models

<sup>b</sup> Data From Five Population-Based Studies: the Cardiovascular Disease, Living and Ageing in Halle Study (CARLA), the Dortmund Health Study (DHS), the Heinz Nixdorf Recall Study (HNR), the Cooperative Health Research in the Region of Augsburg (KORA) S4 Study, and the Study of Health in Pomerania (SHIP), Germany, 1997-2006

<sup>c</sup> men: n=4,537, women: n=4,333

Figure 1: Logistic Regression of Type 2 Diabetes With Interaction of Social Status\*Gender<sup>a, b, c, d</sup>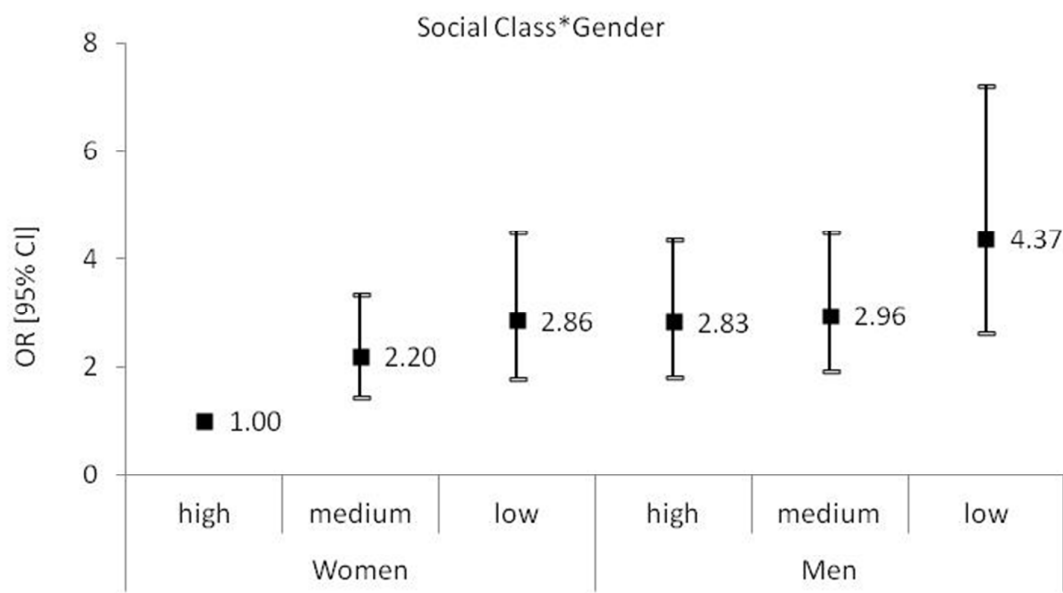

<sup>a</sup> Odds Ratios and 95% Confidence Intervals derived from Three-Level Mixed Effects Logistic Regression Models

<sup>b</sup> Adjusted for Age, Employment Status, Marital Status and Neighborhood Unemployment Rate

<sup>c</sup> Data From Five Population-Based Studies: the Cardiovascular Disease, Living and Ageing in Halle Study (CARLA), the Dortmund Health Study (DHS), the Heinz Nixdorf Recall Study (HNR), the Cooperative Health Research in the Region of Augsburg (KORA) S4 Study, and the Study of Health in Pomerania (SHIP), Germany, 1997-2006

<sup>d</sup> n=8,870

1  
2  
3 **Declaration of Competing Interests**  
4

5 Nothing to declare.  
6  
7  
8  
9  
10  
11  
12  
13  
14  
15  
16  
17  
18  
19  
20  
21  
22  
23  
24  
25  
26  
27  
28  
29  
30  
31  
32  
33  
34  
35  
36  
37  
38  
39  
40  
41  
42  
43  
44  
45  
46  
47  
48  
49  
50  
51  
52  
53  
54  
55  
56  
57  
58  
59  
60

For peer review only

1  
2  
3  
4  
5  
6  
7  
8  
9  
10  
11  
12  
13  
14  
15  
16  
17  
18  
19  
20  
21  
22  
23  
24  
25  
26  
27  
28  
29  
30  
31  
32  
33  
34  
35  
36  
37  
38  
39  
40  
41  
42  
43  
44  
45  
46  
47  
48  
49  
50  
51  
52  
53  
54  
55  
56  
57  
58  
59  
60

**Data sharing statement**

No additional data available.

For peer review only



1  
2  
3 **Patient consent**

4  
5 Obtained.  
6  
7  
8  
9  
10  
11  
12  
13  
14  
15  
16  
17  
18  
19  
20  
21  
22  
23  
24  
25  
26  
27  
28  
29  
30  
31  
32  
33  
34  
35  
36  
37  
38  
39  
40  
41  
42  
43  
44  
45  
46  
47  
48  
49  
50  
51  
52  
53  
54  
55  
56  
57  
58  
59  
60

For peer review only

**Contribution**

The authors G.M., K.B. (DHS), S.H., K.H.G. (CARLA), S.M., N.P. (HNR), S.S., H.V. (SHIP), W.M., and C.M. (KORA) researched data. G.M. developed the study conception, performed the statistical analyses and drafted the manuscript. K.B. contributed to the study conception, statistical analyses and data interpretation. W.R. and T.T. contributed to the pooling of data. All authors critically reviewed the manuscript and contributed to the interpretation of the results.

For peer review only

### Funding statement

This work was supported by the Competence Network Diabetes mellitus of the German Federal Ministry of Education and Research (BMBF, grant 01GI0814).

The Study of Health in Pomerania (SHIP) is part of the Community Medicine Research net (<http://www.community-medicine.de>) at the University of Greifswald, Germany. Funding was provided by grants from the German Federal Ministry of Education and Research (BMBF, grant 01ZZ0403); the Ministry for Education, Research, and Cultural Affairs; and the Ministry for Social Affairs of the Federal State of Mecklenburg–West Pomerania.

The Cardiovascular Disease, Living and Ageing in Halle Study (CARLA) was supported by a grant from the Deutsche Forschungsgemeinschaft as part of the Collaborative Research Center 598 “Heart failure in the elderly - cellular mechanisms and therapy” at the Medical Faculty of the Martin-Luther-University Halle-Wittenberg, by a grant of the Wilhelm-Roux Programme of the Martin-Luther-University Halle-Wittenberg; by the Ministry of Education and Cultural Affairs of Saxony-Anhalt, and by the Federal Employment Office.

The collection of socio-demographic and clinical data in the Dortmund Health Study (DHS) was supported by the German Migraine & Headache Society (DMKG) and by unrestricted grants of equal share from Astra Zeneca, Berlin Chemie, Boots Healthcare, Glaxo-Smith-Kline, McNeil Pharma (former Woelm Pharma), MSD Sharp & Dohme and Pfizer to the University of Muenster.

We thank the Heinz Nixdorf Foundation (Germany) for the generous support of the Heinz Nixdorf Recall Study (HNR). The study is also supported by the German Ministry of Education and Science. We acknowledge the support of the Sarstedt AG & Co. concerning laboratory equipment. We thank the investigative group and the study staff of the Heinz Nixdorf Recall Study.

The KORA research platform (KORA, Cooperative Health Research in the Region of Augsburg) was initiated and financed by the Helmholtz Zentrum München - German Research Center for Environmental Health, which is funded by the German Federal Ministry of Education and Research and by the State of Bavaria. The KORA Diabetes Study was partly funded by a German Research Foundation project grant to W.R. from the German Diabetes Center.

1  
2  
3  
4  
5  
6  
7  
8  
9  
10  
11  
12  
13  
14  
15  
16  
17  
18  
19  
20  
21  
22  
23  
24  
25  
26  
27  
28  
29  
30  
31  
32  
33  
34  
35  
36  
37  
38  
39  
40  
41  
42  
43  
44  
45  
46  
47  
48  
49  
50  
51  
52  
53  
54  
55  
56  
57  
58  
59  
60

The German Diabetes Center is funded by the German Federal Ministry of Health, and the Ministry of School, Science and Research of the State of North-Rhine-Westphalia.

For peer review only

**Reference list**

1. Matheson FI, Moineddin R, Glazier RH. The weight of place: A multilevel analysis of gender, neighborhood material deprivation, and body mass index among Canadian adults. *SOC SCI MED*. 2008;**66**:675-90.
2. Thurston RC, Kubzansky LD, Kawachi I, et al. Is the Association between Socioeconomic Position and Coronary Heart Disease Stronger in Women than in Men? *AM J EPIDEMIOL*. 2005;**162**:57-65.
3. Denton M, Prus S, Walters V. Gender differences in health: a Canadian study of the psychosocial, structural and behavioural determinants of health. *SOC SCI MED*. 2004;**58**:2585-600.
4. MacIntyre S, Hunt K. Socio-economic Position, Gender and Health: How Do They Interact? *J HEALTH PSYCHOL*. 1997;**2**:315-34.
5. Rathmann W, Haastert B, Icks A, et al. Sex differences in the associations of socioeconomic status with undiagnosed diabetes mellitus and impaired glucose tolerance in the elderly population: the KORA Survey 2000. *EUR J PUBLIC HEALTH*. 2005;**15**:627-33.
6. Smith BT, Lynch JW, Fox CS, et al. Life-Course Socioeconomic Position and Type 2 Diabetes Mellitus. *AM J EPIDEMIOL*. 2011;**173**:438-47.
7. Tanaka T, Gjonça E, Gulliford MC. Income, wealth and risk of diabetes among older adults: cohort study using the English longitudinal study of ageing. *EUR J PUBLIC HEALTH*. 2011.
8. Tang M, Chen Y, Krewski D. Gender-related differences in the association between socioeconomic status and self-reported diabetes. *INT J EPIDEMIOL*. 2003;**32**:381-5.
9. Imkampe AK, Gulliford MC. Increasing socio-economic inequality in type 2 diabetes prevalence—Repeated cross-sectional surveys in England 1994–2006. *EUR J PUBLIC HEALTH*. 2011;**21**:484-90.
10. Robbins J, Vaccarino V, Zhang H, et al. Socioeconomic status and type 2 diabetes in African American and non-Hispanic white women and men: evidence from the Third National Health and Nutrition Examination Survey. *AM J PUBLIC HEALTH*. 2001;**91**:76-83.

- 1  
2  
3 11. Diez-Roux AV, Nieto FJ, Muntaner C, et al. Neighborhood Environments and Coronary Heart  
4 Disease: A Multilevel Analysis. *AM J EPIDEMIOL*. 1997;**146**:48-63.
- 5  
6  
7 12. Diez-Roux AV, Jacobs DR, Kiefe CI. Neighborhood characteristics and components of the  
8 insulin resistance syndrome in young adults. *DIABETES CARE*. 2002;**25**:1976-82.
- 9  
10  
11 13. Auchincloss AH, Diez Roux AV, Brown DG, et al. Association of Insulin Resistance with  
12 Distance to Wealthy Areas. *AM J EPIDEMIOL*. 2007;**165**:389-97.
- 13  
14  
15 14. Schipf S, Werner A, Tamayo T, et al. Regional differences in the prevalence of known Type 2  
16 diabetes mellitus in 45–74 years old individuals: Results from six population-based studies in  
17 Germany (DIAB-CORE Consortium). *DIABETIC MED*. 2012;**29**:88-95.
- 18  
19  
20  
21 15. Müller G, Kluttig A, Greiser KH, et al. Regional and Neighborhood Disparities in the Risk of  
22 Type 2 Diabetes: Results from Five Population-Based Studies in Germany (DIAB-CORE  
23 Consortium). *AM J EPIDEMIOL*. 2012; **in press**.
- 24  
25  
26  
27 16. Maier W, Holle R, Hunger M, et al. The impact of regional deprivation and individual socio-  
28 economic status on the prevalence of Type 2 diabetes in Germany. A pooled analysis of five  
29 population-based studies. *Diabetic Medicine*. 2012;n/a-n/a.
- 30  
31  
32  
33 17. Stafford M, Cummins S, Macintyre S, et al. Gender differences in the associations between  
34 health and neighbourhood environment. *SOC SCI MED*. 2005;**60**:1681-92.
- 35  
36  
37 18. Greiser K, Kluttig A, Schumann B, et al. Cardiovascular disease, risk factors and heart rate  
38 variability in the elderly general population: Design and objectives of the CARdiovascular disease,  
39 Living and Ageing in Halle (CARLA) Study. *BMC CARDIOVASC DISORD*. 2005;**5**:33.
- 40  
41  
42  
43 19. Vennemann M, Hummel T, Berger K. The association between smoking and smell and taste  
44 impairment in the general population. *J NEUROL*. 2008;**255**:1121-6.
- 45  
46  
47 20. Völzke H, Alte D, Schmidt CO, et al. Cohort Profile: The Study of Health in Pomerania. *INT J*  
48 *EPIDEMIOL*. 2011;**40**:294-307.
- 49  
50  
51  
52 21. Dragano N, Hoffmann B, Stang A, et al. Subclinical Coronary Atherosclerosis And  
53 Neighbourhood Deprivation in an Urban Region. *EUR J EPIDEMIOL*. 2009;**24**:25-35.
- 54  
55  
56  
57  
58  
59  
60

- 1  
2  
3 22. Rathmann W, Haastert B, Icks A, et al. High prevalence of undiagnosed diabetes mellitus in  
4 Southern Germany: Target populations for efficient screening. The KORA survey 2000. *Diabetologia*.  
5 2003;**46**:182-9.  
6  
7  
8 23. Schunk M, Reitmeir P, Schipf S, et al. Health-related quality of life in subjects with and  
9 without Type 2 diabetes: pooled analysis of five population-based surveys in Germany. *DIABETIC*  
10 *MED*. 2012;**29**:646-53.  
11  
12 24. Breckenkamp J, Mielck A, Razum O. Health inequalities in Germany: do regional-level  
13 variables explain differentials in cardiovascular risk? *BMC PUBLIC HEALTH*. 2007;**7**:132.  
14  
15 25. Dragano N, Bobak M, Wege N, et al. Neighbourhood socioeconomic status and cardiovascular  
16 risk factors: a multilevel analysis of nine cities in the Czech Republic and Germany. *BMC PUBLIC*  
17 *HEALTH*. 2007;**7**:255.  
18  
19 26. Cummins S, Stafford M, Macintyre S, et al. Neighbourhood environment and its association  
20 with self rated health: evidence from Scotland and England. *J EPIDEMIOL COMMUNITY*  
21 *HEALTH*. 2005;**59**:207-13.  
22  
23 27. Larsen K, Merlo J. Appropriate assessment of neighborhood effects on individual health:  
24 Integrating random and fixed effects in multilevel logistic regression. *AM J EPIDEMIOL*.  
25 2005;**161**:81-8.  
26  
27 28. Merlo J, Chaix B, Ohlsson H, et al. A brief conceptual tutorial of multilevel analysis in social  
28 epidemiology: using measures of clustering in multilevel logistic regression to investigate contextual  
29 phenomena. *J EPIDEMIOL COMMUNITY HEALTH*. 2006;**60**:290-7.  
30  
31 29. Sterne JAC, Bradburn MJ, Egger M. Meta-analysis in Stata. In: Egger M, Smith GD, Altman  
32 DG, editors. *Systematic Reviews in Health Care Meta-analysis in context*. London: BMJ; 1995.  
33  
34 30. Huedo-Medina T, Sanchez-Meca J, Marin-Martinez F, et al. Assessing heterogeneity in meta-  
35 analysis: Q statistic or I2 index? Center for Health, Intervention, and Prevention Documents.  
36 2006;**Paper 19**.  
37  
38 31. Arber S, Gilbert GN, Dale A. Paid employment and women's health: a benefit or a source of  
39 role strain? *SOCIOL HEALTH ILL*. 1985;**7**:375-400.  
40  
41  
42  
43  
44  
45  
46  
47  
48  
49  
50  
51  
52  
53  
54  
55  
56  
57  
58  
59  
60

- 1  
2  
3 32. Repetti RL, Matthews KA, Waldron I. Employment and women's health: Effects of paid  
4 employment on women's mental and physical health. *AM PSYCHOL*. 1989;**44**:1394-401.  
5  
6 33. King T, Kavanagh AM, Jolley D, et al. Weight and place: a multilevel cross-sectional survey  
7 of area-level social disadvantage and overweight//obesity in Australia. *INT J OBES*. 2005;**30**:281-7.  
8  
9 34. Robert SA, Reither EN. A multilevel analysis of race, community disadvantage, and body  
10 mass index among adults in the US. *SOC SCI MED*. 2004;**59**:2421-34.  
11  
12 35. MacIntyre S, Hunt K. Socio-economic Position, Gender and Health. *Journal of Health*  
13 *Psychology*. 1997;**2**:315-34.  
14  
15 36. Okura Y, Urban LH, Mahoney DW, et al. Agreement between self-report questionnaires and  
16 medical record data was substantial for diabetes, hypertension, myocardial infarction and stroke but  
17 not for heart failure. *J CLIN EPIDEMIOL*. 2004;**57**:1096-103.  
18  
19 37. Kawachi I, Berkman LF. Introduction. In: Kawachi I, Berkman LF, editors. *Neighborhoods*  
20 *and Health*. Oxford: Oxford University Press; 2003.  
21  
22 38. Diez Roux AV. Estimating neighborhood health effects: the challenges of causal inference in a  
23 complex world. *SOC SCI MED*. 2004;**58**:1953-60.  
24  
25 39. Sampson RJ. Neighborhood-Level Context and Health: Lessons from Sociology. In: Kawachi  
26 I, Berkman LF, editors. *Neighborhoods and Health*. Oxford: Oxford University Press; 2003.  
27  
28 40. Yen IH, Kaplan GA. Neighborhood social environment and risk of death: Multilevel evidence  
29 from the Alameda County Study. *AM J EPIDEMIOL*. 1999;**149**:898-907.  
30  
31  
32  
33  
34  
35  
36  
37  
38  
39  
40  
41  
42  
43  
44  
45  
46  
47  
48  
49  
50  
51  
52  
53  
54  
55  
56  
57  
58  
59  
60



### Online Supplemental Material

Figure 2: Meta Analysis of Five Logistic Regressions of Type 2 Diabetes for the Social Status Score (Range: 2-14 Points) for Women and Men <sup>a, b, c, d</sup>

<sup>a</sup> Odds Ratios and 95% Confidence Intervals derived from Study-Stratified Two-Level Mixed Effects Logistic Regression Models

<sup>b</sup> Adjusted for Age, Employment Status, Marital Status and Neighborhood Unemployment Rate

<sup>c</sup> Data From Five Population-Based Studies: the Cardiovascular Disease, Living and Ageing in Halle Study (CARLA), the Dortmund Health Study (DHS), the Heinz Nixdorf Recall Study (HNR), the Cooperative Health Research in the Region of Augsburg (KORA) S4 Study, and the Study of Health in Pomerania (SHIP), Germany, 1997-2006

<sup>d</sup> Heterogeneity tested via Q-statistic and I<sup>2</sup>-index

1  
2  
3  
4  
5  
6  
7  
8  
9  
10  
11  
12  
13  
14  
15  
16  
17  
18  
19  
20  
21  
22  
23  
24  
25  
26  
27  
28  
29  
30  
31  
32  
33  
34  
35  
36  
37  
38  
39  
40  
41  
42  
43  
44  
45  
46  
47  
48  
49  
50  
51  
52  
53  
54  
55  
56  
57  
58  
59  
60

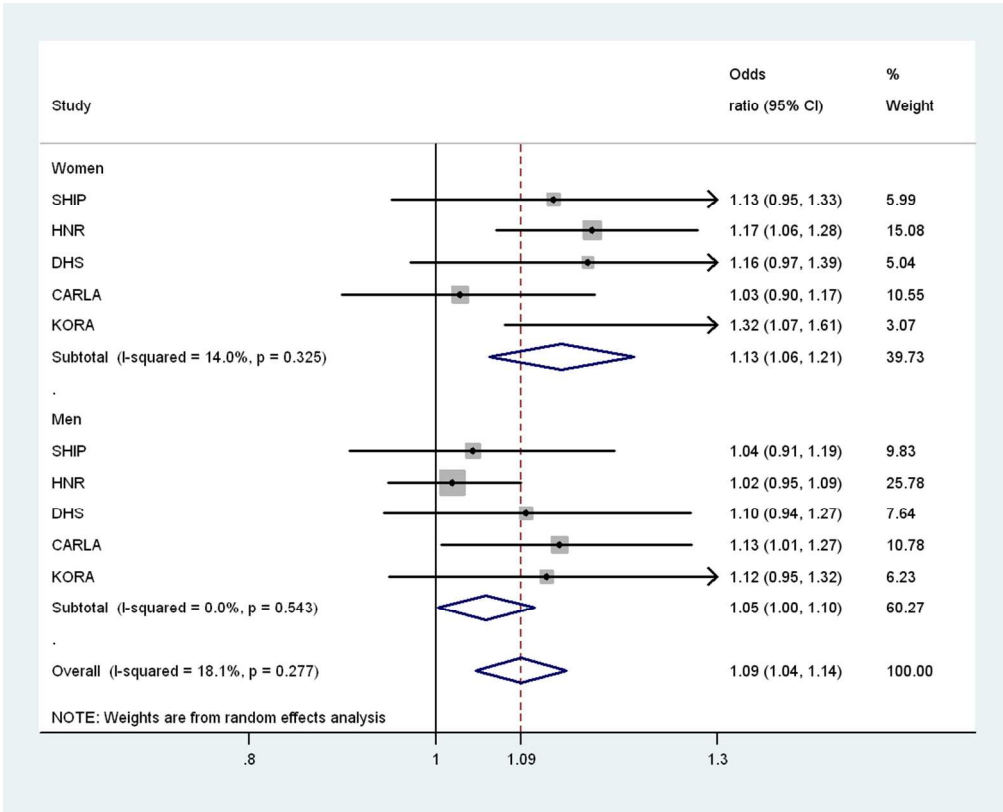

412x333mm (72 x 72 DPI)

For peer review only

STROBE 2007 (v4) Statement—Checklist of items that should be included in reports of *cross-sectional studies*

| Section/Topic                | Item # | Recommendation                                                                                                                                                                       | Reported on page # |
|------------------------------|--------|--------------------------------------------------------------------------------------------------------------------------------------------------------------------------------------|--------------------|
| Title and abstract           | 1      | (a) Indicate the study's design with a commonly used term in the title or the abstract                                                                                               | 2                  |
|                              |        | (b) Provide in the abstract an informative and balanced summary of what was done and what was found                                                                                  | 2                  |
| <b>Introduction</b>          |        |                                                                                                                                                                                      |                    |
| Background/rationale         | 2      | Explain the scientific background and rationale for the investigation being reported                                                                                                 | 5                  |
| Objectives                   | 3      | State specific objectives, including any prespecified hypotheses                                                                                                                     | 5                  |
| <b>Methods</b>               |        |                                                                                                                                                                                      |                    |
| Study design                 | 4      | Present key elements of study design early in the paper                                                                                                                              | 6                  |
| Setting                      | 5      | Describe the setting, locations, and relevant dates, including periods of recruitment, exposure, follow-up, and data collection                                                      | 6                  |
| Participants                 | 6      | (a) Give the eligibility criteria, and the sources and methods of selection of participants                                                                                          | 6                  |
| Variables                    | 7      | Clearly define all outcomes, exposures, predictors, potential confounders, and effect modifiers. Give diagnostic criteria, if applicable                                             | 6-7                |
| Data sources/<br>measurement | 8*     | For each variable of interest, give sources of data and details of methods of assessment (measurement). Describe comparability of assessment methods if there is more than one group | 6-7                |
| Bias                         | 9      | Describe any efforts to address potential sources of bias                                                                                                                            | 8                  |
| Study size                   | 10     | Explain how the study size was arrived at                                                                                                                                            | 6                  |
| Quantitative variables       | 11     | Explain how quantitative variables were handled in the analyses. If applicable, describe which groupings were chosen and why                                                         | 6-7                |
| Statistical methods          | 12     | (a) Describe all statistical methods, including those used to control for confounding                                                                                                | 7-8                |
|                              |        | (b) Describe any methods used to examine subgroups and interactions                                                                                                                  | 7                  |
|                              |        | (c) Explain how missing data were addressed                                                                                                                                          | 6                  |
|                              |        | (d) If applicable, describe analytical methods taking account of sampling strategy                                                                                                   | -                  |
|                              |        | (e) Describe any sensitivity analyses                                                                                                                                                | 8                  |
| <b>Results</b>               |        |                                                                                                                                                                                      |                    |

|                          |     |                                                                                                                                                                                                              |                   |
|--------------------------|-----|--------------------------------------------------------------------------------------------------------------------------------------------------------------------------------------------------------------|-------------------|
| Participants             | 13* | (a) Report numbers of individuals at each stage of study—eg numbers potentially eligible, examined for eligibility, confirmed eligible, included in the study, completing follow-up, and analysed            | 6/8               |
|                          |     | (b) Give reasons for non-participation at each stage                                                                                                                                                         | 6                 |
|                          |     | (c) Consider use of a flow diagram                                                                                                                                                                           | -                 |
| Descriptive data         | 14* | (a) Give characteristics of study participants (eg demographic, clinical, social) and information on exposures and potential confounders                                                                     | 8/15 (table 2)    |
|                          |     | (b) Indicate number of participants with missing data for each variable of interest                                                                                                                          | 6                 |
| Outcome data             | 15* | Report numbers of outcome events or summary measures                                                                                                                                                         | 15                |
| Main results             | 16  | (a) Give unadjusted estimates and, if applicable, confounder-adjusted estimates and their precision (eg, 95% confidence interval). Make clear which confounders were adjusted for and why they were included | 8-10/17 (table 3) |
|                          |     | (b) Report category boundaries when continuous variables were categorized                                                                                                                                    | 6                 |
|                          |     | (c) If relevant, consider translating estimates of relative risk into absolute risk for a meaningful time period                                                                                             | -                 |
| Other analyses           | 17  | Report other analyses done—eg analyses of subgroups and interactions, and sensitivity analyses                                                                                                               | 10                |
| <b>Discussion</b>        |     |                                                                                                                                                                                                              |                   |
| Key results              | 18  | Summarise key results with reference to study objectives                                                                                                                                                     | 11-12             |
| Limitations              | 19  | Discuss limitations of the study, taking into account sources of potential bias or imprecision. Discuss both direction and magnitude of any potential bias                                                   | 13                |
| Interpretation           | 20  | Give a cautious overall interpretation of results considering objectives, limitations, multiplicity of analyses, results from similar studies, and other relevant evidence                                   | 12                |
| Generalisability         | 21  | Discuss the generalisability (external validity) of the study results                                                                                                                                        | 12                |
| <b>Other information</b> |     |                                                                                                                                                                                                              |                   |
| Funding                  | 22  | Give the source of funding and the role of the funders for the present study and, if applicable, for the original study on which the present article is based                                                | 25                |

\*Give information separately for cases and controls in case-control studies and, if applicable, for exposed and unexposed groups in cohort and cross-sectional studies.

**Note:** An Explanation and Elaboration article discusses each checklist item and gives methodological background and published examples of transparent reporting. The STROBE checklist is best used in conjunction with this article (freely available on the Web sites of PLoS Medicine at <http://www.plosmedicine.org/>, Annals of Internal Medicine at <http://www.annals.org/>, and Epidemiology at <http://www.epidem.com/>). Information on the STROBE Initiative is available at [www.strobe-statement.org](http://www.strobe-statement.org).



**Gender Differences in The Association of Individual Social Class And Neighborhood Unemployment Rate With Prevalent Type 2 Diabetes Mellitus: A Cross-sectional Study from The DIAB-CORE Consortium**

|                                 |                                                                                                                                                                                                                                                                                                                                                                                                                                                                                                                                                                                                                                                                                                                                                                                                                                                                                                                                                                                                                                                                                                                                                                                                                                                                                                                                                                                                                                                                                                                                             |
|---------------------------------|---------------------------------------------------------------------------------------------------------------------------------------------------------------------------------------------------------------------------------------------------------------------------------------------------------------------------------------------------------------------------------------------------------------------------------------------------------------------------------------------------------------------------------------------------------------------------------------------------------------------------------------------------------------------------------------------------------------------------------------------------------------------------------------------------------------------------------------------------------------------------------------------------------------------------------------------------------------------------------------------------------------------------------------------------------------------------------------------------------------------------------------------------------------------------------------------------------------------------------------------------------------------------------------------------------------------------------------------------------------------------------------------------------------------------------------------------------------------------------------------------------------------------------------------|
| Journal:                        | <i>BMJ Open</i>                                                                                                                                                                                                                                                                                                                                                                                                                                                                                                                                                                                                                                                                                                                                                                                                                                                                                                                                                                                                                                                                                                                                                                                                                                                                                                                                                                                                                                                                                                                             |
| Manuscript ID:                  | bmjopen-2013-002601.R1                                                                                                                                                                                                                                                                                                                                                                                                                                                                                                                                                                                                                                                                                                                                                                                                                                                                                                                                                                                                                                                                                                                                                                                                                                                                                                                                                                                                                                                                                                                      |
| Article Type:                   | Research                                                                                                                                                                                                                                                                                                                                                                                                                                                                                                                                                                                                                                                                                                                                                                                                                                                                                                                                                                                                                                                                                                                                                                                                                                                                                                                                                                                                                                                                                                                                    |
| Date Submitted by the Author:   | 22-Mar-2013                                                                                                                                                                                                                                                                                                                                                                                                                                                                                                                                                                                                                                                                                                                                                                                                                                                                                                                                                                                                                                                                                                                                                                                                                                                                                                                                                                                                                                                                                                                                 |
| Complete List of Authors:       | Müller, Grit; University of Muenster, Institute of Epidemiology and Social Medicine<br>Hartwig, Saskia; Martin-Luther-University Halle-Wittenberg, Institute of Medical Epidemiology, Biostatistics and Informatics<br>Greiser, Karin Halina; Martin-Luther-University Halle-Wittenberg, Institute of Medical Epidemiology, Biostatistics and Informatics; Division of Cancer Epidemiology, German Cancer Research Center<br>Moebus, Susanne; Institute for Medical Informatics, Biometry and Epidemiology, University Hospital of Essen<br>Pundt, Noreen; Institute for Medical Informatics, Biometry and Epidemiology, University Hospital of Essen<br>Schopf, Sabine; Institute for Community Medicine, University Medicine Greifswald<br>Völzke, Henry; Institute for Community Medicine, University Medicine Greifswald<br>Maier, Werner; German Research Center for Environmental Health (GmbH), Institute of Health Economics and Health Care Management, Helmholtz Zentrum München<br>Meisinger, Christa; German Research Center for Environmental Health (GmbH), Institute of Epidemiology II, Helmholtz Zentrum München<br>Tamayo, Teresa; Institute of Biometrics and Epidemiology, German Diabetes Center, Leibniz Center for Diabetes Research at Heinrich-Heine-University<br>Rathmann, Wolfgang; Institute of Biometrics and Epidemiology, German Diabetes Center, Leibniz Center for Diabetes Research at Heinrich-Heine-University<br>Berger, Klaus; University of Muenster, Institute of Epidemiology and Social Medicine |
| <b>Primary Subject Heading</b>: | Epidemiology                                                                                                                                                                                                                                                                                                                                                                                                                                                                                                                                                                                                                                                                                                                                                                                                                                                                                                                                                                                                                                                                                                                                                                                                                                                                                                                                                                                                                                                                                                                                |
| Secondary Subject Heading:      | Diabetes and endocrinology, Epidemiology, Public health                                                                                                                                                                                                                                                                                                                                                                                                                                                                                                                                                                                                                                                                                                                                                                                                                                                                                                                                                                                                                                                                                                                                                                                                                                                                                                                                                                                                                                                                                     |
| Keywords:                       | General diabetes < DIABETES & ENDOCRINOLOGY, EPIDEMIOLOGY, PUBLIC HEALTH                                                                                                                                                                                                                                                                                                                                                                                                                                                                                                                                                                                                                                                                                                                                                                                                                                                                                                                                                                                                                                                                                                                                                                                                                                                                                                                                                                                                                                                                    |
|                                 |                                                                                                                                                                                                                                                                                                                                                                                                                                                                                                                                                                                                                                                                                                                                                                                                                                                                                                                                                                                                                                                                                                                                                                                                                                                                                                                                                                                                                                                                                                                                             |

1  
2  
3  
4  
5  
6  
7  
8  
9  
10  
11  
12  
13  
14  
15  
16  
17  
18  
19  
20  
21  
22  
23  
24  
25  
26  
27  
28  
29  
30  
31  
32  
33  
34  
35  
36  
37  
38  
39  
40  
41  
42  
43  
44  
45  
46  
47  
48  
49  
50  
51  
52  
53  
54  
55  
56  
57  
58  
59  
60

SCHOLARONE™  
Manuscripts

For peer review only

1  
2  
3 **Gender Differences in The Association of Individual Social Class And Neighborhood**  
4 **Unemployment Rate With Prevalent Type 2 Diabetes Mellitus: A Cross-sectional Study from**  
5 **The DIAB-CORE Consortium**  
6  
7

8  
9 **Short title: Gender Differences in the Association of Socio-Economic Factors With Diabetes**  
10

11  
12 Grit Müller<sup>1</sup>, Saskia Hartwig<sup>2</sup>, Karin Halina Greiser<sup>2,3</sup>, Susanne Moebus<sup>4</sup>, Noreen Pundt<sup>4</sup>, Sabine  
13 Schipf<sup>5</sup>, Henry Völzke<sup>5</sup>, Werner Maier<sup>6</sup>, Christa Meisinger<sup>7</sup>, Teresa Tamayo<sup>8</sup>, Wolfgang Rathmann<sup>8</sup>,  
14 Klaus Berger<sup>1</sup>, for the DIAB-CORE Consortium  
15  
16

17  
18  
19 <sup>1</sup> Institute of Epidemiology and Social Medicine, University of Muenster, Germany

20 <sup>2</sup> Institute of Medical Epidemiology, Biostatistics and Informatics, Martin-Luther-University Halle-  
21 Wittenberg, Halle (Saale), Germany  
22

23 <sup>3</sup> Division of Cancer Epidemiology, German Cancer Research Center (DKFZ), Heidelberg, Germany

24 <sup>4</sup> Institute for Medical Informatics, Biometry and Epidemiology, University Hospital of Essen,  
25 University Duisburg-Essen, Essen, Germany

26 <sup>5</sup> Institute for Community Medicine, University Medicine Greifswald, Greifswald, Germany

27 <sup>6</sup> Helmholtz Zentrum München, German Research Center for Environmental Health (GmbH), Institute  
28 of Health Economics and Health Care Management, Neuherberg, Germany

29 <sup>7</sup> Helmholtz Zentrum München, German Research Center for Environmental Health (GmbH), Institute  
30 of Epidemiology II, Neuherberg, Germany

31 <sup>8</sup> Institute of Biometrics and Epidemiology, German Diabetes Center, Leibniz Center for Diabetes  
32 Research at Heinrich-Heine-University, Düsseldorf, Germany  
33  
34

35  
36 Corresponding author:

37 Address: Grit Mueller  
38 Institute of Epidemiology and Social Medicine  
39 University of Muenster  
40 Domagkstraße 3  
41 48149 Muenster  
42 Germany

43 Email: muellegr@uni-muenster.de

44 Fon: 0049-251-83-55649

45 Fax: 0049-251-83-55300  
46  
47  
48  
49  
50

51 **Keywords:** Type 2 Diabetes mellitus, Gender, Multilevel Analysis, Residence Characteristics,  
52 Socioeconomic Factors, Population-based  
53

54 Word count: 3632  
55  
56  
57  
58  
59  
60

1  
2  
3 **Abstract** (word count: 256; max. 300)  
4  
5

6  
7 **Objective:** To analyze gender differences in the relationship of individual social class, employment  
8 status and neighborhood unemployment rate with present type 2 diabetes mellitus (T2DM).  
9

10  
11 **Design:** Five cross-sectional studies.  
12

13 **Setting:** Studies were conducted in five regions of Germany from 1997-2006.  
14

15 **Participants:** The sample consisted of 8,870 individuals residing in 226 neighborhoods in five urban  
16 regions.  
17

18  
19 **Primary and secondary outcome measures:** Prevalent T2DM.  
20

21 **Results:** We found significant multiplicative interactions between gender and the individual variables  
22 social class and employment status (being unemployed, retired). Social class was statistically  
23 significant associated with T2DM in men and women, whereby this association was stronger in  
24 women (low versus high social class: odds ratio (OR) 2.68 (95% confidence intervals (CI): 1.66-4.34))  
25 than men (low versus high social class: OR 1.75 (95% CI: 1.20-2.54)). Significant associations of  
26 employment status and T2DM were only found in women (unemployed versus employed: OR 1.73  
27 (95% CI: 1.02-2.92); retired versus employed: OR 1.77 (95% CI: 1.10-2.84); others versus employed:  
28 OR 1.64 (95% CI: 1.01-2.67)). Neighborhood unemployment rate was associated with T2DM in men  
29 (highest versus lowest tertile: OR 1.52 (95% CI: 1.18-1.96)). Between-study and between-  
30 neighborhood variation in the T2DM prevalence was more pronounced in women. The considered  
31 covariates helped to explain statistically the variation in the T2DM prevalence among men, but not  
32 among women.  
33  
34  
35  
36  
37  
38  
39  
40  
41  
42  
43  
44

45 **Conclusions:** Social class was inversely associated with T2DM in both men and women, whereby the  
46 association was more pronounced in women. Employment status only affected T2DM in women.  
47  
48 Neighborhood unemployment rate is an important predictor of T2DM in men, but not in women.  
49  
50  
51  
52  
53  
54  
55  
56  
57  
58  
59  
60



## Article Summary

### Article focus

- The aim of this study was to examine disparities in the association of individual social class, employment status and neighborhood unemployment rate with prevalent T2DM by gender in a pooled analysis of five population-based regional studies.

### Key messages

- Social class was statistically significantly associated with T2DM among women and men, however, the association was stronger in women than men; particularly the individual employment status is an important determinant of T2DM in women.
- Between-study and between-neighborhood variance in T2DM was more pronounced in women, as already observed for obesity.
- Neighborhood unemployment rate is only associated with T2DM in men after the adjustment for individual variables.

### Strength and limitations of this study

- Data of five population-based representative studies linking data on the prevalence of T2DM to small areas and regions were applied.
- This study adds knowledge to the research on the interaction of gender, social determinants on different levels and health.
- Limitations were as follows: The cross-sectional design does not allow causal conclusions; T2DM was based on a self-reported physician's diagnosis; Administrative definitions of neighborhoods could result in exposure misclassification and underestimation of neighborhood effects; Problem of residential selection.

**List of Abbreviations**

|           |                                                                |
|-----------|----------------------------------------------------------------|
| CARLA     | Cardiovascular Disease, Living and Ageing in Halle Study       |
| CI        | Confidence Interval                                            |
| DHS       | Dortmund Health Study                                          |
| DIAB-CORE | Diabetes Collaborative Research of Epidemiologic Studies       |
| HNR       | Heinz Nixdorf Recall Study                                     |
| KORA S4   | Cooperative Health Research in the Region of Augsburg Survey 4 |
| MOR       | Median Odds Ratio                                              |
| OR        | Odds Ratio                                                     |
| SD        | Standard Deviation                                             |
| SE        | Standard Error                                                 |
| SHIP      | Study of Health in Pomerania                                   |
| T2DM      | Type 2 Diabetes Mellitus                                       |
| $V_A$     | Area-Level Variance                                            |

## Introduction

Gender differences in health inequality vary by the studied health outcome, the measure of social status and the stage of life course [1-3]. A systematic review of 23 case-control and cohort studies on socio-economic differences in the incidence of type 2 diabetes mellitus (T2DM) concluded that inequality in the risk of T2DM was stronger in women than men [4]. For instance, Smith et al. examined the association between the life-course socio-economic position and T2DM in the Framingham Offspring Study and detected a significant association among women but not among men [5]. Similar results were shown by Imkampe et al. [6].

Tanaka et al. [7] found associations among both men and women: With an increasing level of wealth the authors presented an increasing odds of T2DM in men and women in an older population aged 50+, but the association was more pronounced in women. Differentiating by ethnicity, Robbins et al. reported a significant association between SES and T2DM among Caucasian and African American women but an inconsistent relationship in Caucasian and African American men [8]. Tang et al. [9] and Ross et al. [10] found as well weak association between measures of social status and T2DM in men.

Contrasting results were found by Kumari et al. [11] and Maty et al. [12]. The first study presented a stronger inverse relationship between the civil service employment grade and the incidence of T2DM in men, applying data of the Whitehall study II. The latter work reported higher T2DM risks for blue-collar men than women in comparison to white-collar employees.

Beyond an individual's social class, socio-economic characteristics of the neighborhood affect health [13-15]. As part of the Diabetes Collaborative Research of Epidemiologic Studies (DIAB-CORE) in Germany, Schipf et al. reported regional disparities in the age-standardized prevalence of T2DM [16]. In two recent studies, we found that the prevalence of T2DM varied across regions in Germany, even after adjustment for individual characteristics. These variations could in part be explained statistically by neighborhood unemployment rate within cities or by regional deprivation [17 18].

Gender differences may arise out of different exposures to social, psychosocial and behavioral determinants of health ("differential exposure hypothesis"). Another explanation might be a different vulnerability to health determinants, characteristics of the neighborhood and reaction to material,

1  
2  
3 behavioral and psychosocial conditions of men and women (“differential vulnerability hypothesis”) [2  
4 19]. Differences in men’s and women’s perception of the neighborhood context and social status may  
5 be as well a source of health disparities [19]. Stafford et al. examined gender differences in the  
6 relationship between self-rated health and the neighborhood context and found a larger impact of the  
7 neighborhood context on the health of women [19].  
8  
9

10  
11 The aim of this study was (1) to investigate if the association of individual social class, individual  
12 employment status and neighborhood unemployment rate with prevalent T2DM differs for men and  
13 women in a pooled analysis of five population-based regional studies; and (2) to examine the extent to  
14 which the prevalence of T2DM varies by gender between neighborhoods and regions in Germany. In a  
15 sub-analysis, we performed study-specific calculations of the relationship between T2DM and social  
16 class in men and women.  
17  
18  
19  
20  
21  
22  
23  
24

## 25 26 27 **Methods**

28  
29 Within the DIAB-CORE, cross-sectional data of five regional studies were pooled: the Cardiovascular  
30 Disease, Living and Ageing in Halle Study (CARLA), the Dortmund Health Study (DHS), the Heinz  
31 Nixdorf Recall Study (HNR), the Cooperative Health Research in the Region of Augsburg (KORA)  
32 S4 Study, and the Study of Health in Pomerania (SHIP). Data collection was conducted between 1997  
33 and 2006. The studies have similar study designs (population-based), sampling procedures (two-stage  
34 cluster or stratified random sampling) and response proportions (56%-69%). The studies were  
35 approved by local ethics committees and informed written consent was obtained from the study  
36 participants. Within the five studies, similar instruments, questionnaires and medical measurements  
37 were applied to collect data. Study designs have been described elsewhere in more detail [20-24].  
38  
39

40  
41 In brief, data on 11,688 subjects aged 45-74 years were provided. 2,281 individuals living in rural  
42 areas of KORA and SHIP were excluded from the sample, because these subject could not be assigned  
43 to spatial units below the level of municipalities; so, that our study was limited to urban areas. Study  
44 participants were assigned to neighborhoods via addresses of residence at baseline (eight subjects  
45 could not be linked). The neighborhoods were defined by administrative units: statistical  
46 administrative units (subdivision of city districts) in HNR and DHS, city districts in CARLA, planning  
47  
48  
49  
50  
51  
52  
53  
54  
55  
56  
57  
58  
59  
60

1  
2  
3 regions (summary of city districts) in KORA and postal code areas in SHIP. The 9,399 study  
4 participants of the sample resided in 227 neighborhoods of the total 236 neighborhoods in the five  
5 study regions. After further exclusion of participants with missing information on individual  
6 characteristics (n=529), the final sample consisted of 8,870 residents in 226 neighborhoods.  
7

8  
9  
10 Based on the definition of the DIAB-CORE Consortium [25], a T2DM case was defined as self-  
11 reported physician-diagnosed T2DM or self-reported T2DM treatment (insulin, oral anti-diabetic  
12 agents, dietary treatment). Subjects reporting an age at diagnosis of 30 years or younger were excluded  
13 from the analyses to avoid inclusion of possible cases of type 1 diabetes.  
14

15  
16  
17 Social class was measured with a summary score of income and education. Its' operationalization  
18 was derived from the Winkler-Index of Socioeconomic Status [26], which summarizes information on  
19 individual educational and professional attainment, net household income and the occupational  
20 position of the main earner of a household. The three dimensions are transformed to an ordinal scale  
21 ranging from 1 to 7 and summed up to an index with a scale from 3 to 21 points. Since the information  
22 on occupational status was not available for our analysis, the index was solely based on education and  
23 income, ranging between 2 and 14 points. The index was divided into three groups: high social class,  
24 medium social class and low social class. Study participants were classified in four employment status  
25 groups: employed, retired and unemployed individuals as well as persons with other forms of  
26 employment, including participants in vocational retraining, housewives and housemen.  
27

28  
29  
30 Neighborhood unemployment rate was applied as a proxy for the socio-economic status of the  
31 neighborhoods. Neighborhood unemployment rate was calculated as the number of unemployed  
32 residents in relation to the working-age population (15-64 years of age), obtained from the statistical  
33 offices of each considered city. The median year of the data collection period of each study was used  
34 as the reference year. A number of studies applied unemployment rate as a measure of deprivation and  
35 it was proven to be a strong predictor of health outcomes [22 27-29]. Campbell et al. highlighted that  
36 unemployment rate is a simple and good indicator for social and material deprivation, which is  
37 regularly updated and easily accessible [30]. For our analysis, equally-sized tertiles of study-specific  
38 neighborhood unemployment rate were used to detect a potential dose-response relationship.  
39  
40  
41  
42  
43  
44  
45  
46  
47  
48  
49  
50  
51  
52  
53  
54  
55  
56  
57  
58  
59  
60

1  
2  
3 The variable marital status summarized information whether a study participant lived with or without a  
4 partner. Moreover, life style variables including smoking status (current smoker; former smoker; never  
5 smoker), physical exercise (exercise; no exercise), body mass index (BMI) ( $<30 \text{ kg/m}^2$ ;  $\geq 30 \text{ kg/m}^2$ )  
6 and alcohol consumption (no or moderate intake: women:  $\leq 20$  grams per day; men:  $\leq 40$  grams per  
7 day; high intake: women:  $>20$  grams per day; men:  $>40$  grams per day) were considered. Exercising  
8 included any exercise irrespective of frequency and duration. All variables were constructed following  
9 DIAB-CORE standard procedures for the homogenization of basic variables to ensure a high degree of  
10 comparability.  
11  
12  
13  
14  
15  
16  
17  
18  
19

### 20 21 **Statistical Analysis**

22 Descriptive analysis included the calculation of crude and age-adjusted prevalence of T2DM (derived  
23 from a logistic regression) and corresponding 95% confidence intervals (CI) by gender for individual  
24 variables and neighborhood unemployment rate.  
25  
26  
27

28 Our data set had a hierarchical structure including individuals (level 1), nested within neighborhoods  
29 (level 2), which were nested in study regions (level 3). To account for this data structure in our  
30 statistical analysis, multi-level modeling methods were applied. We conducted a series of mixed  
31 effects logistic regression models. First, we tested for interactions between gender and individual  
32 social class, employment status and neighborhood unemployment rate. To do so, we estimated  
33 regression models including terms for gender and social class, employment status or neighborhood  
34 unemployment rate as main effects and an interaction term for the effect of social class, employment  
35 status or neighborhood unemployment rate by gender. Second, gender-stratified analyses were  
36 conducted with a stepwise modeling strategy. The models were adjusted for the confounding variables  
37 age, marital status and the remaining social variables (social class/ employment status/ neighborhood  
38 unemployment rate) depending on the variable of interest. Life style factors, including smoking,  
39 alcohol consumption, BMI and physical activity were evaluated as potential mediators in the  
40 relationship between T2DM and individual social class, employment status or neighborhood  
41 unemployment rate. The results were presented as odds ratios (OR) with corresponding 95% CI.  
42  
43  
44  
45  
46  
47  
48  
49  
50  
51  
52  
53  
54  
55  
56  
57  
58  
59  
60

1  
2  
3 Random effects were included to capture between-study and between-neighborhood variance reported  
4 as median odds ratios (MOR). The latter represents a transformation of the area-level variation ( $V_A$ ) on  
5 an OR-scale. The MOR gives the median value of all ORs between a randomly chosen highest- and  
6 lowest-risk-area. The MOR was calculated on the level of neighborhoods and study regions with the  
7 following equation:  $MOR = \exp(\sqrt{(2 * V_A)} * 0.6745)$ , where 0.6745 is the 75<sup>th</sup> centile of the  
8 cumulative distribution function of the normal distribution with mean zero and variance one [31 32].  
9

10  
11 Study-specific analyses were performed and analyzed with meta-analytical tools. Due to the small  
12 number of cases, the social class variable had to be applied as a continuous measure in this sub-  
13 analysis (ranging between two points, highest social class, and 14 points, lowest social class). For this  
14 purpose, inverse-variance weighting was used to estimate fixed and random effects summary estimates  
15 and displayed in forest plots [33]. Q-statistic and  $I^2$  index were applied to assess heterogeneity and the  
16 extent of heterogeneity between study results respectively [34]. Analyses were performed in STATA/  
17 SE 11.0.  
18  
19  
20  
21  
22  
23  
24  
25  
26  
27  
28  
29  
30  
31

## 32 Results

33  
34 In total, 8,870 subjects residing in 226 neighborhoods in five urban regions were included in our  
35 analysis. Characteristics of the five studies are displayed in table 1. The crude T2DM prevalence was  
36 statistically significantly lower among women than men, 7.5% (95% CI 6.7-8.3) versus 10.0% (95%  
37 CI 9.2-10.9) (significance derived from 95% CI). This pattern was observed in all five regional  
38 studies. Socio-demographic characteristics are reported in table 2. Women belonged more often to the  
39 low or medium social class and a higher proportion was not employed compared to men, except in  
40 SHIP. A higher proportion of women than men reported to live without a partner.  
41  
42  
43  
44  
45  
46  
47

48 The age-adjusted prevalence of T2DM was statistically significantly lower in high social class women  
49 and men than in the low social class (4.7% (95% CI: 3.9-5.7) respectively 9.7% (95% CI: 8.2-11.4) in  
50 women; 6.9% (95% CI: 5.9-8.1) respectively 14.1% (95% CI: 11.8-16.7) in men) (table 3). Women  
51 had a statistically significantly lower age-adjusted T2DM prevalence than men over all social classes.  
52 Employed men had a statistically significantly lower age-adjusted T2DM prevalence with 7.3% (95%  
53 CI: 6.2-8.7) than retired men with 10.2% (95% CI: 8.8-11.7). Across neighborhoods, the highest age-  
54  
55  
56  
57  
58  
59  
60

1  
2  
3 adjusted prevalence of T2DM was found in women and men living in neighborhoods with a high  
4 unemployment rate (8.3% (95% CI: 7.2-9.5), respectively 10.9% (95% CI: 9.6-12.3)). Individuals  
5  
6 living without a partner showed statistically significantly higher prevalence than individuals who lived  
7  
8 with a partner irrespective of gender. Being physical inactive or having a BMI of 30 or above was  
9  
10 statistically significantly associated with a higher T2DM prevalence in men and women.

11  
12 In the fully adjusted multivariable analyses, the interaction terms of social class and gender were  
13 statistically significant. Among the employment status, we found significant multiplicative interactions  
14  
15 between unemployed individuals and gender as well as between retired individuals and gender. The  
16  
17 interaction terms between neighborhood unemployment rate and gender were not statistically  
18  
19 significant.  
20  
21

22  
23 The results of the gender-stratified multivariable regression analysis are presented in table 4. Among  
24  
25 women and men, we found a statistically significant association of social class and T2DM. The social  
26  
27 gradient in the odds of T2DM was reduced when the models were adjusted for age and the  
28  
29 confounding variables. This reduction was particularly large in women. Overall, the association  
30  
31 between social class and T2DM was stronger in women (low versus high social class: OR 2.68 (95%  
32  
33 CI: 1.66-4.34); medium versus high social class: OR 2.02 (95% CI: 1.31-3.13)) than men (low versus  
34  
35 high social class: OR 1.75 (95% CI: 1.20-2.54); medium versus high social class: OR 1.13 (95% CI:  
36  
37 0.89-1.43)) (model 3, table 4). Significant associations of employment status and T2DM were only  
38  
39 found in women: In reference to employed women, unemployed women, retired women and women  
40  
41 with other employment status had a 1.73, (95% CI: 1.02-2.92), a 1.77 (95% CI: 1.10-2.84)  
42  
43 respectively a 1.64 (95% CI: 1.01-2.67)) higher odds to have T2DM. The significant elevated odds of  
44  
45 T2DM in retired men were dissolved by adjustment for age. Women residing in neighborhoods with a  
46  
47 medium level of unemployment showed a significant elevated odds to have T2DM (OR 1.45 (95% CI:  
48  
49 1.03-2.04), model 2), which was dissolved when the model was adjusted by confounding variables. In  
50  
51 contrast, men residing in neighborhoods with a high level of unemployment showed a 52% (95% CI:  
52  
53 1.18-1.96) higher odds to have T2DM than men in low unemployment neighborhoods in the  
54  
55 confounder-adjusted model 3. T2DM was no longer associated with marital status after adjustment by  
56  
57  
58  
59  
60



1  
2  
3 confounding variables in model 3 (living without versus living with a partner: OR 1.17 (95% CI: 0.90-  
4 1.51) in women, OR 1.19 (95% CI: 0.88-1.59) in men).

5  
6 In model 4, the life style factors BMI, physical activity and smoking (only men) were introduced in  
7 the model. These life style factors were previously evaluated to be associated with social class,  
8 employment status (not associated with physical exercise in women) and neighborhood unemployment  
9 rate as well with the presence of type 2 diabetes (smoking only in men). In men and women, we  
10 observed effect modifications among individual social class, employment status and neighborhood  
11 unemployment rate when introducing these life style factors into the analysis. Especially, the  
12 association between social class and T2DM was strongly reduced in women mainly accounted by the  
13 BMI.  
14

15  
16 Between-study and between-neighborhood variation in the prevalence of T2DM was larger in women  
17 than men. The prevalence of T2DM in men varied only between study regions (model 1: MOR: 1.21;  
18  $V_A$ : 0.04; SE: 0.04), which was fully explained statistically by age, social class, employment status,  
19 neighborhood unemployment rate, marital status and life style factors. The T2DM prevalence in  
20 women showed large variation across neighborhoods (model 1: MOR: 1.47;  $V_A$ : 0.16; SE: 0.10) and  
21 study regions (model 1: MOR: 1.31;  $V_A$ : 0.08; SE: 0.07), which was not dissolved by the considered  
22 explanatory variables (model 4, between-neighborhood variation: MOR: 1.42;  $V_A$ : 0.13; SE: 0.10,  
23 between-study variation: MOR: 1.27;  $V_A$ : 0.06; SE: 0.06).  
24

25  
26 Regarding gender differences in health inequalities across regions, the effect estimates of the five  
27 studies were tested to be homogenous (figure 1). A low social class was associated with a higher odds  
28 of T2DM, adjusted for age, employment status, marital status and neighborhood unemployment rate.  
29 In women, an increase of one point on the social class score (decrease in social class) was associated  
30 with an increase of 13% (pooled OR: 1.13 (95% CI: 1.06-1.21);  $I^2=14.0\%$ ;  $p=0.325$ ) in the odds of  
31 having T2DM. This association was smaller in men (pooled OR: 1.05 (95% CI: 1.00-1.10);  $I^2=0.0\%$ ;  
32  $p=0.543$ ), although the differences between genders were not significant. This was observed in all  
33 studies, except CARLA.  
34  
35  
36  
37  
38  
39  
40  
41  
42  
43  
44  
45  
46  
47  
48  
49  
50  
51  
52  
53  
54  
55  
56  
57  
58  
59  
60

## Discussion

This study assessed gender differences in the association of individual social class, employment status and neighborhood unemployment rate with prevalent T2DM, using data from five regional population-based studies in Germany. Women and men belonging to the low social class had a higher prevalence of T2DM. We found that the gradient in the prevalence of T2DM across social classes was clearly stronger in women than men. This pattern was consistent across all regions but CARLA and in line with results of prior studies presenting only associations in women [6 9 10], or in men and women but more pronounced in women [7 8].

In our study, the individual employment status was only associated with T2DM in women. Being unemployed, retired or a housewife yielded higher odds of T2DM. However, since we were not able to consider occupational position in our analyses, the interpretation of these findings is limited. In the literature, two contrasting theories are discussed for the effects of paid employment on women's health. Employment can have a health promoting function due to role accumulation in contrast to the monotony, isolation, low status and self-esteem of housewives. A health damaging effect could arise due to role strains, e.g. stress due to multiple roles, and heavy job demands [35 36].

Men residing in neighborhoods with a high level of unemployment rate were more likely to have T2DM than men in better-off neighborhoods. These effects remained even after adjustment for confounding and mediator variables, whereas associations between neighborhood unemployment rate and T2DM in women were dissolved by the introduction of confounding variables. These deviating effects of neighborhood unemployment rate between men and women may be explained by the fact that men were more often engaged in employment and, hence, depend more on the regional labor market and its employment opportunities than women. Potential underlying mechanisms in the relationship between neighborhood unemployment and T2DM include neighborhood resources such as the availability of grocery stores offering healthy food and recreational facilities [15], the adoption and maintenance of risky health behavior and psychosocial factors such as chronic stress [13 37].

Between-study and between-neighborhood variation in the prevalence of T2DM was larger in women than men. We found that individual social class, employment status and neighborhood unemployment rate played an important role in explaining statistically regional differences in the prevalence of T2DM

1  
2  
3 in men. A large fraction of the detected variation in the prevalence of T2DM on the level of  
4 neighborhoods and regions remained statistically unexplained in women, suggesting that there were  
5 characteristics on the individual, neighborhood and regional level that determine the presence of  
6 T2DM and which were not considered in our analysis. Previous work on regional variation in self-  
7 rated health and BMI also found larger regional variation in women [19 38 39].  
8  
9

10  
11 The gender-specific pattern in the association between social class and the prevalence of T2DM need  
12 to be further explored, since the pathways are still unknown [8]. Macintyre et al. noted that socio-  
13 economic determinants vary in their meaning for men and women, since both genders are socialized in  
14 different ways with diverging social roles and coping strategies against stress; they hold different  
15 occupational positions in the labor market and have dissimilar access to material and psycho-social  
16 resources [40]. In our study, overall women were less likely to be in the high social class and were less  
17 often employed.  
18  
19

20  
21 To gain more insight in mechanisms of social inequalities on health, the analysis of population  
22 subgroups is essential, since one limitation of the existing literature is the assumption that mechanisms  
23 operate identically in different population groups [19]. This work adds knowledge to the research on  
24 the interaction of gender, social determinants and health. So far, only few studies examined this  
25 interaction with regard to T2DM and to our knowledge no study considered neighborhood  
26 unemployment rate in regard to that, so far. Data sources providing representative population-based  
27 data on the prevalence of T2DM with a linkage to small areas and regions are still rare.  
28  
29

30  
31 Some limitations of this work should be acknowledged. We analyzed cross-sectional data with limited  
32 causal conclusions. We could not use occupation as an indicator of social class in our analysis since  
33 the assessment was not comparable between studies. The prevalence of T2DM was based on a self-  
34 reported T2DM physician's diagnosis only, which could not be validated. Therefore, undetected type 2  
35 diabetes could be a source of bias. However, Okura et al. found a high accuracy between self-reports  
36 and medical records for diabetes and other chronic diseases [41]. Recently, Jackson et al. concluded  
37 that self-reported diabetes is a valid outcome for observational studies from an accuracy of 91.8% of  
38 self-reported prevalent diabetes validated by medical records based on the Women's Health Initiative  
39 [42]. Another potential limitation is the selection by response (response proportions: 56%-69%),  
40  
41  
42  
43  
44  
45  
46  
47  
48  
49  
50  
51  
52  
53  
54  
55  
56  
57  
58  
59  
60

1  
2  
3 which might have affected our results. The exclusion of participants from the initial sample due to  
4  
5 missing information on individual characteristics (mainly due to missing information on net household  
6  
7 income) could have led to an underestimation of the social gradient in T2DM, because these subjects  
8  
9 were on average older, more often female, out of employment and with a lower educational status.  
10  
11 However, a sensitivity analysis showed similar results applying education as measure of social class.  
12  
13 We used administrative definitions for neighborhoods. Hence, neighborhoods in our study may not  
14  
15 capture the immediate neighborhood of residence of our study participants. This could lead to  
16  
17 exposure misclassification and underestimation of neighborhood effects [43]. The applied  
18  
19 administrative definition of neighborhoods differed between studies and neighborhoods were diverse  
20  
21 according to their area and population size. Another challenge in the research of neighborhood impact  
22  
23 on health is the residential selection. Individuals may be selected into neighborhoods due to their  
24  
25 individual characteristics, such as residents of poor areas cannot afford moving to better-off  
26  
27 neighborhoods [44 45]. Finally, we had no information on the residential history of the study  
28  
29 participants, which could result in an underestimation of neighborhood effects on health [46].  
30  
31

32  
33 In conclusion, our study identified different relationships of individual social class, employment status  
34  
35 and neighborhood unemployment rate with the prevalence of T2DM for women and men. In both men  
36  
37 and women, the prevalence of T2DM was inversely related to social class. This social gradient was  
38  
39 stronger in women. Regional variance in the T2DM prevalence was larger in women than men.  
40  
41 Whereas the major proportion of the variance in the T2DM prevalence remained statistically  
42  
43 unexplained in women, the regional variance in men was low and completely explained by the  
44  
45 considered variables.  
46  
47  
48  
49  
50  
51  
52  
53  
54  
55  
56  
57  
58  
59  
60

Table 1: Characteristics of The Five Studies (CARLA, DHS, KORA, HNR, and SHIP studies, Germany, 1997-2006)<sup>a</sup>

|                                           | CARLA                      | DHS                                 | KORA                       | HNR                                  | SHIP                                   |
|-------------------------------------------|----------------------------|-------------------------------------|----------------------------|--------------------------------------|----------------------------------------|
| Federal State (Region)                    | Saxony-Anhalt (east)       | North Rhine-Westphalia (west)       | Bavaria (south)            | North Rhine-Westphalia (west)        | Mecklenburg-West Pomerania (northeast) |
| Sampling                                  | stratified random sampling | stratified random sampling          | two-stage cluster sampling | stratified random sampling           | two-stage cluster sampling             |
| Cities                                    | Halle (Saale)              | Dortmund                            | Augsburg                   | Bochum, Essen, Mülheim               | Greifswald, Stralsund                  |
| Neighborhoods (n)                         | 43 city districts          | 62 statistical administrative units | 17 planning regions        | 108 statistical administrative units | 6 clusters of city districts           |
| Corresponding year                        | 2003                       | 2003                                | 2000                       | 2000/ 2001                           | 1999 (2003)                            |
| Total population (neighborhood range)     | 238,078 (18 - 19,210)      | 587,607 (476 - 25,686)              | 252,725 (2,730 - 37,246)   | 1,142,112 (262 - 32,466)             | 115,962 (5,230 - 31,154)               |
| Unemployment rate (%; neighborhood range) | 14.1 (3.9 - 22.5)          | 15.3 (5.0 - 27.7)                   | 4.8 (1.9 - 7.6)            | 7.5 (1.7 - 13.5)                     | 13.1 (9.9 - 14.9)                      |

<sup>a</sup> the Cardiovascular Disease, Living and Ageing in Halle Study (CARLA), the Dortmund Health Study (DHS), the Heinz Nixdorf Recall Study (HNR), the Cooperative Health Research in the Region of Augsburg (KORA) S4 Study, and the Study of Health in Pomerania (SHIP)

Table 2: Socio-demographic Characteristics of Men And Women in The Five Population-Based Studies (CARLA, DHS, KORA, HNR, SHIP, Germany, 1997-2006)<sup>a</sup>

| Study                                                           | CARLA            |                 | DHS             |                | KORA            |               | HNR             |               | SHIP            |                |
|-----------------------------------------------------------------|------------------|-----------------|-----------------|----------------|-----------------|---------------|-----------------|---------------|-----------------|----------------|
|                                                                 | men              | women           | men             | women          | men             | women         | men             | women         | men             | women          |
| <b>Study period</b>                                             | 12/2002-01/2006  |                 | 09/2003-06/2004 |                | 10/1999-04/2001 |               | 12/2000-06/2003 |               | 10/1997-03/2001 |                |
| <b>Participants 45-74 with full information</b>                 | 719              | 638             | 414             | 411            | 532             | 494           | 2,257           | 2,175         | 615             | 615            |
| <b>Number of neighborhoods (range of residing participants)</b> | 37 (3-139)       |                 | 60 (1-42)       |                | 17 (13-141)     |               | 106 (1-140)     |               | 6 (95-396)      |                |
| <b>Crude diabetes prevalence (%) (95% CI)</b>                   | 12.9 (10.6-15.6) | 12.1 (9.6-14.9) | 11.8 (8.9-15.3) | 7.8 (5.4-10.8) | 7.0 (4.9-9.5)   | 5.5 (3.6-7.9) | 8.9 (7.8-10.2)  | 5.9 (5.0-7.0) | 11.7 (9.3-14.5) | 9.6 (7.4-12.2) |
| <b>Mean age (SD)</b>                                            | 61.0 (8.0)       | 60.4 (7.8)      | 60.9 (8.4)      | 59.7 (8.5)     | 58.9 (8.6)      | 58.8 (8.4)    | 59.53 (7.8)     | 59.4 (7.81)   | 60.3 (8.3)      | 58.8 (8.3)     |
| <b>Social class % (n)</b>                                       |                  |                 |                 |                |                 |               |                 |               |                 |                |
| lower                                                           | 7.4 (53)         | 13.0 (83)       | 11.1 (46)       | 23.8 (98)      | 5.8 (31)        | 16.4 (81)     | 6.2 (140)       | 19.7 (429)    | 12.2 (75)       | 26.0 (160)     |
| middle                                                          | 61.3 (441)       | 65.1 (415)      | 46.1 (191)      | 46.2 (190)     | 48.5 (258)      | 54.1 (267)    | 53.0 (1195)     | 55.9 (1215)   | 67.3 (414)      | 63.1 (388)     |
| higher                                                          | 31.3 (225)       | 21.9 (140)      | 42.8 (177)      | 29.9 (123)     | 45.7 (243)      | 29.6 (146)    | 40.9 (922)      | 24.4 (531)    | 20.5 (126)      | 10.9 (67)      |
| <b>Employment status % (n)</b>                                  |                  |                 |                 |                |                 |               |                 |               |                 |                |
| employed                                                        | 34.9 (251)       | 30.6 (195)      | 38.7 (160)      | 34.8 (143)     | 50.4 (268)      | 35.0 (173)    | 46.4 (1047)     | 31.9 (693)    | 33.3 (205)      | 35.1 (216)     |
| retired                                                         | 48.1 (346)       | 52.0 (332)      | 51.9 (215)      | 33.8 (139)     | 42.9 (228)      | 39.3 (194)    | 47.6 (1075)     | 37.4 (813)    | 54.0 (332)      | 49.6 (305)     |
| unemployed                                                      | 15.2 (109)       | 12.4 (79)       | 7.3 (30)        | 6.1 (25)       | 6.4 (34)        | 8.9 (44)      | 5.7 (129)       | 7.5 (162)     | 12.4 (76)       | 14.5 (89)      |
| others                                                          | 1.8 (13)         | 5.0 (32)        | 2.2 (9)         | 25.3 (104)     | 0.4 (2)         | 16.8 (83)     | 0.3 (6)         | 23.3 (507)    | 0.3 (2)         | 0.8 (5)        |
| <b>Marital status (%)</b>                                       |                  |                 |                 |                |                 |               |                 |               |                 |                |
| living with a partner                                           | 89.0 (640)       | 73.4 (468)      | 86.7 (359)      | 71.5 (294)     | 82.5 (439)      | 67.2 (332)    | 90.2 (2035)     | 74.7 (1624)   | 88.3 (543)      | 68.8 (423)     |
| living without a partner                                        | 11.0 (79)        | 26.7 (170)      | 13.3 (55)       | 28.5 (117)     | 17.5 (93)       | 32.8 (162)    | 9.8 (222)       | 25.3 (551)    | 11.7 (72)       | 31.2 (192)     |

<sup>a</sup> the Cardiovascular Disease, Living and Ageing in Halle Study (CARLA), the Dortmund Health Study (DHS), the Heinz Nixdorf Recall Study (HNR), the Cooperative Health Research in the Region of Augsburg (KORA) S4 Study, and the Study of Health in Pomerania (SHIP)

Table 3: Gender-Stratified Crude And Age-Adjusted Prevalence of Type 2 Diabetes Mellitus by Individual Variables And Neighborhood Unemployment Rate With Data From Five Population-Based Studies (CARLA, DHS, KORA, HNR, SHIP, Germany, 1997-2006)<sup>a, b</sup>

|                          | Men  |                            |      |           |                           |           | Women |                            |      |           |                           |          |
|--------------------------|------|----------------------------|------|-----------|---------------------------|-----------|-------|----------------------------|------|-----------|---------------------------|----------|
|                          | No.  | Crude Prevalence T2D Cases | %    | 95% CI    | Age-adjusted Prevalence % | 95% CI    | No.   | Crude Prevalence T2D Cases | %    | 95% CI    | Age-adjusted Prevalence % | 95% CI   |
| <b>Social class</b>      |      |                            |      |           |                           |           |       |                            |      |           |                           |          |
| low                      | 345  | 56                         | 16.2 | 12.5-20.6 | 14.1                      | 11.8-16.7 | 851   | 104                        | 12.2 | 10.1-14.6 | 9.7                       | 8.2-11.4 |
| middle                   | 2499 | 267                        | 10.7 | 9.5-12.0  | 9.7                       | 8.7-10.8  | 2475  | 194                        | 7.8  | 6.8-9.0   | 6.6                       | 5.8-7.5  |
| high                     | 1693 | 129                        | 7.6  | 6.4-9.0   | 6.9                       | 5.9-8.1   | 1007  | 26                         | 2.6  | 1.7-3.8   | 4.7                       | 3.9-5.7  |
| <b>Employment status</b> |      |                            |      |           |                           |           |       |                            |      |           |                           |          |
| employed                 | 1931 | 126                        | 6.5  | 5.5-7.7   | 7.3                       | 6.2-8.7   | 1420  | 39                         | 2.8  | 2.0-3.7   | 5.5                       | 4.6-6.7  |
| unemployed               | 2196 | 289                        | 13.2 | 11.8-14.7 | 10.3                      | 8.0-13.2  | 1783  | 213                        | 12.0 | 10.5-13.5 | 7.9                       | 6.0-10.2 |
| retired                  | 378  | 32                         | 8.5  | 5.9-11.7  | 10.2                      | 8.8-11.7  | 399   | 26                         | 6.5  | 4.3-9.4   | 7.8                       | 6.6-9.1  |
| others                   | 32   | 5                          | 15.6 | 5.3-3.3   | 8.7                       | 6.4-11.6  | 731   | 46                         | 6.3  | 4.6-8.3   | 6.6                       | 5.0-8.6  |
| <b>Marital status</b>    |      |                            |      |           |                           |           |       |                            |      |           |                           |          |
| Living with a partner    | 4016 | 387                        | 9.6  | 8.7-10.6  | 8.7                       | 7.9-9.5   | 3141  | 199                        | 6.3  | 5.5-7.2   | 6.2                       | 5.5-7.0  |
| Living without a partner | 521  | 65                         | 12.5 | 9.8-15.6  | 11.5                      | 9.7-13.4  | 1192  | 125                        | 10.5 | 8.8-12.4  | 8.3                       | 7.1-9.6  |
| <b>Physical exercise</b> |      |                            |      |           |                           |           |       |                            |      |           |                           |          |
| physical exercise        | 2473 | 193                        | 7.8  | 6.8-8.9   | 7.4                       | 6.6-8.4   | 2262  | 136                        | 6.0  | 5.1-7.1   | 5.5                       | 4.8-6.4  |
| no physical exercise     | 2007 | 255                        | 12.7 | 11.3-14.2 | 10.9                      | 9.7-12.1  | 1989  | 178                        | 8.9  | 7.7-10.3  | 8.1                       | 7.2-9.2  |
| <b>Smoking</b>           |      |                            |      |           |                           |           |       |                            |      |           |                           |          |
| never smoked             | 1369 | 112                        | 8.2  | 6.8-9.8   | 8.3                       | 7.2-9.6   | 2502  | 208                        | 8.3  | 7.3-9.5   | 6.5                       | 5.7-7.4  |
| ex-smoker                | 1962 | 227                        | 11.6 | 10.2-13.1 | 9.6                       | 8.4-10.8  | 894   | 67                         | 7.5  | 5.9-9.4   | 7.5                       | 6.4-8.9  |
| current smoker           | 1149 | 109                        | 9.5  | 7.9-11.3  | 8.6                       | 7.3-10.1  | 855   | 39                         | 4.6  | 3.3-6.2   | 6.8                       | 5.6-8.1  |
| <b>BMI</b>               |      |                            |      |           |                           |           |       |                            |      |           |                           |          |

1  
2  
3  
4  
5  
6  
7  
8  
9  
10  
11  
12  
13  
14  
15  
16  
17  
18  
19  
20  
21  
22  
23  
24  
25  
26  
27  
28  
29  
30  
31  
32  
33  
34  
35  
36  
37  
38  
39  
40  
41  
42  
43  
44  
45  
46  
47  
48  
49

|                            |      |     |      |           |      |           |      |     |      |           |      |           |
|----------------------------|------|-----|------|-----------|------|-----------|------|-----|------|-----------|------|-----------|
| < 30                       | 3217 | 258 | 8.0  | 7.1-9.0   | 6.5  | 5.8-7.3   | 2993 | 123 | 4.1  | 3.4-4.9   | 4.7  | 4.1-5.4   |
| ≥ 30                       | 1263 | 190 | 15.0 | 13.1-17.1 | 15.4 | 13.7-17.2 | 1258 | 191 | 15.2 | 13.2-17.3 | 11.4 | 10.0-13.0 |
| <b>Alcohol consumption</b> |      |     |      |           |      |           |      |     |      |           |      |           |
| no or moderate intake      | 3967 | 410 | 10.3 | 9.4-11.3  | 9.2  | 8.3-10.1  | 4013 | 303 | 7.6  | 6.8-8.4   | 6.8  | 6.1-7.7   |
| high intake                | 513  | 38  | 7.4  | 5.3-10.0  | 7.3  | 5.6-9.6   | 238  | 11  | 4.6  | 2.3-8.1   | 5.5  | 4.0-7.3   |
| <b>Unemployment rate</b>   |      |     |      |           |      |           |      |     |      |           |      |           |
| low                        | 1519 | 125 | 8.2  | 6.9-9.7   | 7.4  | 6.4-8.6   | 1384 | 85  | 6.1  | 4.9-7.5   | 5.6  | 4.8-6.6   |
| mid                        | 1578 | 143 | 9.1  | 7.7-10.6  | 8.6  | 7.5-9.9   | 1527 | 120 | 7.9  | 6.6-9.3   | 6.5  | 5.6-7.6   |
| high                       | 1440 | 184 | 12.8 | 11.1-14.6 | 10.9 | 9.6-12.3  | 1422 | 119 | 8.4  | 7.0-9.9   | 8.3  | 7.2-9.5   |

<sup>a</sup> the Cardiovascular Disease, Living and Ageing in Halle Study (CARLA), the Dortmund Health Study (DHS), the Heinz Nixdorf Recall Study (HNR), the Cooperative Health Research in the Region of Augsburg (KORA) S4 Study, and the Study of Health in Pomerania (SHIP)

<sup>b</sup> Age-adjusted prevalence are derived from logistic regression models in the whole sample



Table 4: Gender-Stratified Multi-Level Logistic Regression of Type 2 Diabetes Mellitus by Individual Social Class, Employment Status and Neighborhood Unemployment Rate<sup>a, b, c</sup>

|                               |       | Social class<br>(Reference: high social class) |                  | Employment status<br>(Reference: employed) |                  |                  | Unemployment rate<br>(Reference: low unemployment rate) |                  |
|-------------------------------|-------|------------------------------------------------|------------------|--------------------------------------------|------------------|------------------|---------------------------------------------------------|------------------|
|                               |       | middle                                         | low              | retired                                    | unemployed       | others           | middle                                                  | high             |
|                               |       | OR (95% CI)                                    | OR (95% CI)      | OR (95% CI)                                | OR (95% CI)      | OR (95% CI)      | OR (95% CI)                                             | OR (95% CI)      |
| <b>Model 1<sup>d</sup></b>    | Women | 3.11 (2.04-4.73)                               | 5.37 (3.44-8.40) | 4.71 (3.31-6.69)                           | 2.36 (1.41-3.95) | 2.65 (1.69-4.14) | 1.45 (1.03-2.04)                                        | 1.26 (0.89-1.79) |
|                               | Men   | 1.42 (1.13-1.77)                               | 2.26 (1.61-3.18) | 2.13 (1.71-2.65)                           | 1.24 (0.82-1.87) | 2.37 (0.89-6.31) | 1.15 (0.89-1.48)                                        | 1.58 (1.24-2.02) |
| <b>Model 2<sup>e</sup></b>    | Women | 2.25 (1.46-3.45)                               | 3.16 (1.99-5.03) | 2.01 (1.26-3.21)                           | 2.07 (1.23-3.48) | 1.77 (1.10-2.85) | 1.45 (1.03-2.04)                                        | 1.25 (0.88-1.78) |
|                               | Men   | 1.21 (0.96-1.51)                               | 1.99 (1.41-2.81) | 1.24 (0.90-1.72)                           | 1.17 (0.77-1.76) | 1.97 (0.73-5.28) | 1.12 (0.86-1.45)                                        | 1.62 (1.26-2.70) |
| <b>Model 3<sup>f</sup></b>    | Women | 2.02 (1.31-3.13)                               | 2.68 (1.66-4.34) | 1.77 (1.10-2.84)                           | 1.73 (1.02-2.92) | 1.64 (1.01-2.67) | 1.36 (0.96-1.93)                                        | 1.13 (0.79-1.62) |
|                               | Men   | 1.13 (0.89-1.43)                               | 1.75 (1.20-2.54) | 1.09 (0.77-1.52)                           | 0.94 (0.61-1.44) | 1.99 (0.74-5.36) | 1.08 (0.83-1.40)                                        | 1.52 (1.18-1.96) |
| <b>Model 4<sup>g, h</sup></b> | Women | 1.55 (0.99-2.41)                               | 1.76 (1.07-2.90) | 1.66 (1.03-2.68)                           | 1.74 (1.02-2.98) | 1.64 (1.00-2.70) | 1.21 (0.85-1.73)                                        | 1.03 (0.71-1.48) |
|                               | Men   | 1.03 (0.81-1.31)                               | 1.49 (1.02-2.20) | 1.02 (0.72-1.44)                           | 0.91 (0.59-1.40) | 1.71 (0.63-4.66) | 1.06 (0.82-1.37)                                        | 1.45 (1.13-1.86) |

<sup>a</sup> Odds Ratios and 95% Confidence Intervals derived from Three-Level Mixed Effects Logistic Regression Models

<sup>b</sup> Data From Five Population-Based Studies: the Cardiovascular Disease, Living and Ageing in Halle Study (CARLA), the Dortmund Health Study (DHS), the Heinz Nixdorf Recall Study (HNR), the Cooperative Health Research in the Region of Augsburg (KORA) S4 Study, and the Study of Health in Pomerania (SHIP), Germany, 1997-2006

<sup>c</sup> men: n=4,537, women: n=4,333

<sup>d</sup> Model 1: unadjusted

<sup>e</sup> Model 2: adjusted by age

<sup>f</sup> Model 3: adjusted by other confounders: social class, employment status, neighborhood unemployment rate, marital status

<sup>g</sup> Model 4: adjusted by mediators: BMI, physical exercise, smoking (only for men)

1  
2  
3  
4  
5  
6  
7  
8  
9  
10  
11  
12  
13  
14  
15  
16  
17  
18  
19  
20  
21  
22  
23  
24  
25  
26  
27  
28  
29  
30  
31  
32  
33  
34  
35  
36  
37  
38  
39  
40  
41  
42  
43  
44  
45  
46  
47  
48  
49

<sup>h</sup> Sample size n=8,731 due to 139 missing values on life style factors

For peer review only

Figure 1: Meta Analysis of Five Logistic Regressions of Type 2 Diabetes Mellitus for the Social Class Score (Range: 2-14 Points) in Women and Men<sup>a, b, c, d</sup>

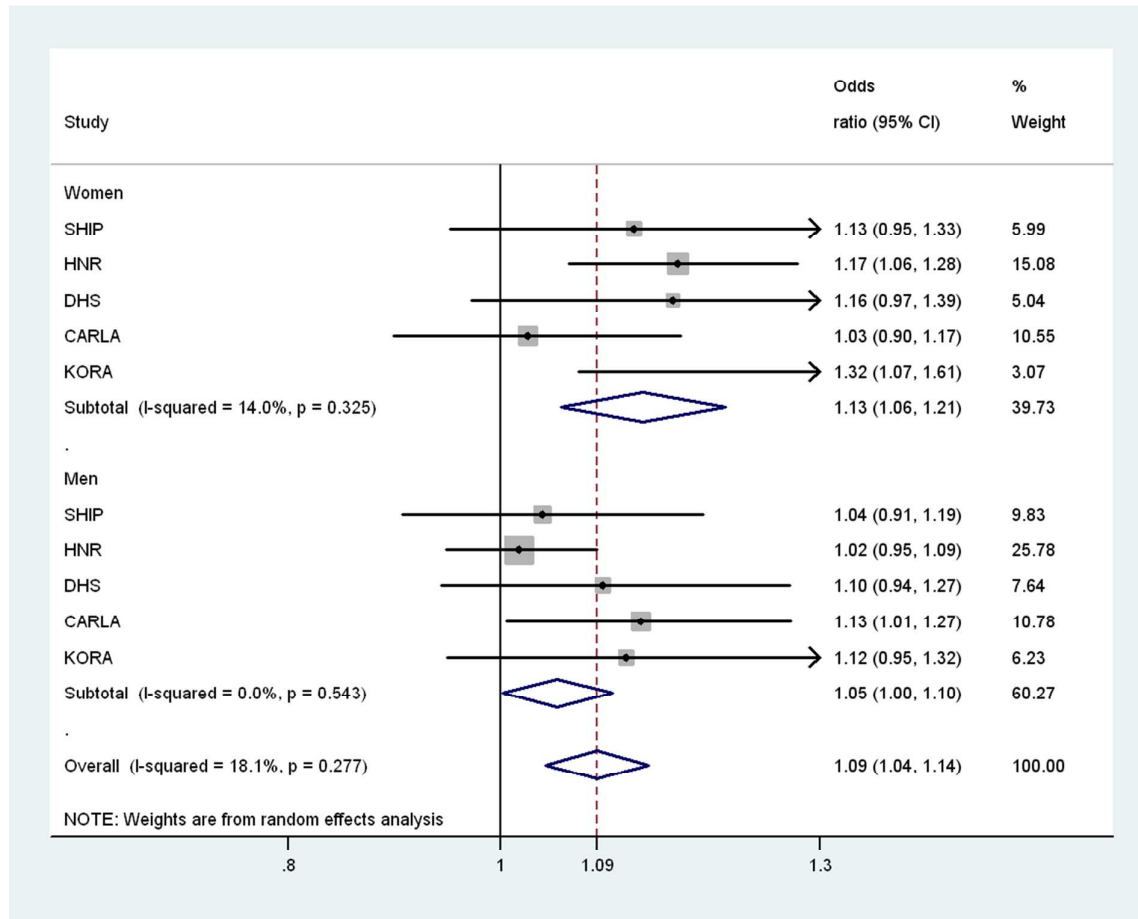

<sup>a</sup> Odds Ratios and 95% Confidence Intervals derived from Study-Stratified Two-Level Mixed Effects Logistic Regression Models

<sup>b</sup> Adjusted for Age, Employment Status, Marital Status and Neighborhood Unemployment Rate

<sup>c</sup> Data From Five Population-Based Studies: the Cardiovascular Disease, Living and Ageing in Halle Study (CARLA), the Dortmund Health Study (DHS), the Heinz Nixdorf Recall Study (HNR), the Cooperative Health Research in the Region of Augsburg (KORA) S4 Study, and the Study of Health in Pomerania (SHIP), Germany, 1997-2006

<sup>d</sup> Heterogeneity tested via Q-statistic and I<sup>2</sup>-index

1  
2  
3  
4  
5  
6  
7  
8  
9  
10  
11  
12  
13  
14  
15  
16  
17  
18  
19  
20  
21  
22  
23  
24  
25  
26  
27  
28  
29  
30  
31  
32  
33  
34  
35  
36  
37  
38  
39  
40  
41  
42  
43  
44  
45  
46  
47  
48  
49  
50  
51  
52  
53  
54  
55  
56  
57  
58  
59  
60

**Declaration of Competing Interests**

Nothing to declare.

For peer review only

1  
2  
3 **Data sharing statement**  
4

5 There is no additional data available.  
6  
7  
8  
9  
10  
11  
12  
13  
14  
15  
16  
17  
18  
19  
20  
21  
22  
23  
24  
25  
26  
27  
28  
29  
30  
31  
32  
33  
34  
35  
36  
37  
38  
39  
40  
41  
42  
43  
44  
45  
46  
47  
48  
49  
50  
51  
52  
53  
54  
55  
56  
57  
58  
59  
60

For peer review only

1  
2  
3  
4  
5  
6  
7  
8  
9  
10  
11  
12  
13  
14  
15  
16  
17  
18  
19  
20  
21  
22  
23  
24  
25  
26  
27  
28  
29  
30  
31  
32  
33  
34  
35  
36  
37  
38  
39  
40  
41  
42  
43  
44  
45  
46  
47  
48  
49  
50  
51  
52  
53  
54  
55  
56  
57  
58  
59  
60

**Patient consent**

Obtained.

For peer review only

**Contribution**

The authors G.M., K.B. (DHS), S.H., K.H.G. (CARLA), S.M., N.P. (HNR), S.S., H.V. (SHIP), W.M., and C.M. (KORA) researched data. G.M. developed the study conception, performed the statistical analyses and drafted the manuscript. K.B. contributed to the study conception, statistical analyses and data interpretation. W.R. and T.T. contributed to the pooling of data. All authors critically reviewed the manuscript and contributed to the interpretation of the results.

For peer review only

### Funding statement

This work was supported by the Competence Network Diabetes mellitus of the German Federal Ministry of Education and Research (BMBF, grant 01GI0814).

The Study of Health in Pomerania (SHIP) is part of the Community Medicine Research net (<http://www.community-medicine.de>) at the University of Greifswald, Germany. Funding was provided by grants from the German Federal Ministry of Education and Research (BMBF, grant 01ZZ0403); the Ministry for Education, Research, and Cultural Affairs; and the Ministry for Social Affairs of the Federal State of Mecklenburg–West Pomerania.

The Cardiovascular Disease, Living and Ageing in Halle Study (CARLA) was supported by a grant from the Deutsche Forschungsgemeinschaft as part of the Collaborative Research Center 598 “Heart failure in the elderly - cellular mechanisms and therapy” at the Medical Faculty of the Martin-Luther-University Halle-Wittenberg, by a grant of the Wilhelm-Roux Programme of the Martin-Luther-University Halle-Wittenberg; by the Ministry of Education and Cultural Affairs of Saxony-Anhalt, and by the Federal Employment Office.

The collection of socio-demographic and clinical data in the Dortmund Health Study (DHS) was supported by the German Migraine & Headache Society (DMKG) and by unrestricted grants of equal share from Astra Zeneca, Berlin Chemie, Boots Healthcare, Glaxo-Smith-Kline, McNeil Pharma (former Woelm Pharma), MSD Sharp & Dohme and Pfizer to the University of Muenster.

We thank the Heinz Nixdorf Foundation (Germany) for the generous support of the Heinz Nixdorf Recall Study (HNR). The study is also supported by the German Ministry of Education and Science. We acknowledge the support of the Sarstedt AG & Co. concerning laboratory equipment. We thank the investigative group and the study staff of the Heinz Nixdorf Recall Study.

The KORA research platform (KORA, Cooperative Health Research in the Region of Augsburg) was initiated and financed by the Helmholtz Zentrum München - German Research Center for Environmental Health, which is funded by the German Federal Ministry of Education and Research and by the State of Bavaria. The KORA Diabetes Study was partly funded by a German Research Foundation project grant to W.R. from the German Diabetes Center.



1  
2  
3 The German Diabetes Center is funded by the German Federal Ministry of Health, and the Ministry of  
4  
5 School, Science and Research of the State of North-Rhine-Westphalia.  
6  
7  
8  
9  
10  
11  
12  
13  
14  
15  
16  
17  
18  
19  
20  
21  
22  
23  
24  
25  
26  
27  
28  
29  
30  
31  
32  
33  
34  
35  
36  
37  
38  
39  
40  
41  
42  
43  
44  
45  
46  
47  
48  
49  
50  
51  
52  
53  
54  
55  
56  
57  
58  
59  
60

For peer review only

**Reference list**

1. Thurston RC, Kubzansky LD, Kawachi I, Berkman LF. Is the Association between Socioeconomic Position and Coronary Heart Disease Stronger in Women than in Men? *AM J EPIDEMIOLOG* 2005;**162**(1):57-65
2. Denton M, Prus S, Walters V. Gender differences in health: a Canadian study of the psychosocial, structural and behavioural determinants of health. *SOC SCI MED* 2004;**58**(12):2585-600
3. MacIntyre S, Hunt K. Socio-economic Position, Gender and Health: How Do They Interact? *J HEALTH PSYCHOL* 1997;**2**(3):315-34
4. Agardh E, Allebeck P, Hallqvist J, Moradi T, Sidorchuk A. Type 2 diabetes incidence and socio-economic position: a systematic review and meta-analysis. *International Journal of Epidemiology* 2011;**40**(3):804-18
5. Smith BT, Lynch JW, Fox CS, et al. Life-Course Socioeconomic Position and Type 2 Diabetes Mellitus. *AM J EPIDEMIOLOG* 2011;**173**(4):438-47
6. Imkampe AK, Gulliford MC. Increasing socio-economic inequality in type 2 diabetes prevalence—Repeated cross-sectional surveys in England 1994–2006. *EUR J PUBLIC HEALTH* 2011;**21**(4):484-90
7. Tanaka T, Gjonça E, Gulliford MC. Income, wealth and risk of diabetes among older adults: cohort study using the English longitudinal study of ageing. *EUR J PUBLIC HEALTH* 2011
8. Robbins J, Vaccarino V, Zhang H, Kasl S. Socioeconomic status and type 2 diabetes in African American and non-Hispanic white women and men: evidence from the Third National Health and Nutrition Examination Survey. *AM J PUBLIC HEALTH* 2001;**91**(1):76-83
9. Tang M, Chen Y, Krewski D. Gender-related differences in the association between socioeconomic status and self-reported diabetes. *INT J EPIDEMIOLOG* 2003;**32**(3):381-85
10. Ross NA, Gilmour H, Dasgupta K. 14-year diabetes incidence: The role of socio-economic status. *Health Reports Statistics Canada* 2010;**21**(3)
11. Kumari M, Head J, Marmot M. Prospective Study of Social and Other Risk Factors for Incidence of Type 2 Diabetes in the Whitehall II Study. *Arch Intern Med* 2004;**164**(17):1873-80 doi: 10.1001/archinte.164.17.1873[published Online First: Epub Date].

- 1  
2  
3 12. Maty SC, Everson-Rose SA, Haan MN, Raghunathan TE, Kaplan GA. Education, income,  
4 occupation, and the 34-year incidence (1965–99) of Type 2 diabetes in the Alameda County  
5 Study. *International Journal of Epidemiology* 2005;**34**(6):1274-81 doi:  
6  
7 10.1093/ije/dyi167[published Online First: Epub Date]].  
8  
9  
10  
11 13. Diez-Roux AV, Jacobs DR, Kiefe CI. Neighborhood characteristics and components of the insulin  
12 resistance syndrome in young adults. *DIABETES CARE* 2002;**25**(11):1976-82  
13  
14 14. Auchincloss AH, Diez Roux AV, Brown DG, O'Meara ES, Raghunathan TE. Association of  
15 Insulin Resistance with Distance to Wealthy Areas. *AM J EPIDEMIOLOG* 2007;**165**(4):389-97  
16  
17 15. Auchincloss AH, Diez Roux AV, Brown DG, Erdmann CA, Bertoni AG. Neighborhood resources  
18 for physical activity and healthy foods and their association with insulin resistance.  
19 *Epidemiology* 2008;**19**(1):146-57 doi: 10.1097/EDE.0b013e31815c480[published Online  
20 First: Epub Date]].  
21  
22  
23 16. Schipf S, Werner A, Tamayo T, et al. Regional differences in the prevalence of known Type 2  
24 diabetes mellitus in 45–74 years old individuals: Results from six population-based studies in  
25 Germany (DIAB-CORE Consortium). *DIABET MED* 2012;**29**(7):88-95  
26  
27 17. Müller G, Kluttig A, Greiser KH, et al. Regional and Neighborhood Disparities in the Risk of Type  
28 2 Diabetes: Results from Five Population-Based Studies in Germany (DIAB-CORE  
29 Consortium). *AM J EPIDEMIOLOG* 2013; **in press**  
30  
31 18. Maier W, Holle R, Hunger M, et al. The impact of regional deprivation and individual socio-  
32 economic status on the prevalence of Type 2 diabetes in Germany. A pooled analysis of five  
33 population-based studies. *Diabet Medicine* 2013;**30**(3):e78-e86  
34  
35 19. Stafford M, Cummins S, Macintyre S, Ellaway A, Marmot M. Gender differences in the  
36 associations between health and neighbourhood environment. *SOC SCI MED*  
37 2005;**60**(8):1681-92  
38  
39 20. Greiser K, Kluttig A, Schumann B, et al. Cardiovascular disease, risk factors and heart rate  
40 variability in the elderly general population: Design and objectives of the CARdiovascular  
41 disease, Living and Ageing in Halle (CARLA) Study. *BMC CARDIOVASC DISORD*  
42 2005;**5**(1):33  
43  
44  
45  
46  
47  
48  
49  
50  
51  
52  
53  
54  
55  
56  
57  
58  
59  
60

- 1  
2  
3 21. Völzke H, Alte D, Schmidt CO, et al. Cohort Profile: The Study of Health in Pomerania. INT J  
4  
5 EPIDEMIOL 2011;**40**(2):294-307  
6  
7 22. Dragano N, Hoffmann B, Stang A, et al. Subclinical Coronary Atherosclerosis And  
8  
9 Neighbourhood Deprivation in an Urban Region. EUR J EPIDEMIOL 2009;**24**(1):25-35  
10  
11 23. Rathmann W, Haastert B, Icks A, et al. High prevalence of undiagnosed diabetes mellitus in  
12  
13 Southern Germany: Target populations for efficient screening. The KORA survey 2000.  
14  
15 Diabetologia 2003;**46**(2):182-89  
16  
17 24. Vennemann M, Hummel T, Berger K. The association between smoking and smell and taste  
18  
19 impairment in the general population. J NEUROL 2008;**255**(8):1121-26  
20  
21 25. Schunk M, Reitmeir P, Schipf S, et al. Health-related quality of life in subjects with and without  
22  
23 Type 2 diabetes: pooled analysis of five population-based surveys in Germany. DIABET  
24  
25 MED 2012;**29**(5):646-53  
26  
27 26. Breckenkamp J, Mielck A, Razum O. Health inequalities in Germany: do regional-level variables  
28  
29 explain differentials in cardiovascular risk? BMC PUBLIC HEALTH 2007;**7**(1):132  
30  
31 27. Dragano N, Bobak M, Wege N, et al. Neighbourhood socioeconomic status and cardiovascular  
32  
33 risk factors: a multilevel analysis of nine cities in the Czech Republic and Germany. BMC  
34  
35 PUBLIC HEALTH 2007;**7**(1):255  
36  
37 28. Cummins S, Stafford M, Macintyre S, Marmot M, Ellaway A. Neighbourhood environment and its  
38  
39 association with self rated health: evidence from Scotland and England. J EPIDEMIOL  
40  
41 COMMUNITY HEALTH 2005;**59**(3):207-13  
42  
43 29. van Lenthe FJ, Borrell LN, Costa G, et al. Neighbourhood unemployment and all cause mortality:  
44  
45 a comparison of six countries. Journal of Epidemiology and Community Health  
46  
47 2005;**59**(3):231-37 doi: 10.1136/jech.2004.022574[published Online First: Epub Date]].  
48  
49 30. Campbell DA, Radford JM, Burton P. Unemployment rates: an alternative to the Jarman index?  
50  
51 BRIT MED J 1991;**303**(6805):750-55 doi: 10.1136/bmj.303.6805.750[published Online First:  
52  
53 Epub Date]].  
54  
55  
56  
57  
58  
59  
60

- 1  
2  
3 31. Larsen K, Merlo J. Appropriate assessment of neighborhood effects on individual health:  
4  
5 Integrating random and fixed effects in multilevel logistic regression. *AM J EPIDEMIOL*  
6  
7 2005;**161**(1):81-88  
8
- 9 32. Merlo J, Chaix B, Ohlsson H, et al. A brief conceptual tutorial of multilevel analysis in social  
10  
11 epidemiology: using measures of clustering in multilevel logistic regression to investigate  
12  
13 contextual phenomena. *J EPIDEMIOL COMMUNITY HEALTH* 2006;**60**(4):290-97  
14
- 15 33. Sterne JAC, Bradburn MJ, Egger M. Meta-analysis in Stata. In: Egger M, Smith GD, Altman DG,  
16  
17 eds. *Systematic Reviews in Health Care. Meta-analysis in context*. London: BMJ, 1995.  
18
- 19 34. Huedo-Medina T, Sanchez-Meca J, Marin-Martinez F, Botella J. Assessing heterogeneity in meta-  
20  
21 analysis: Q statistic or I<sup>2</sup> index? Center for Health, Intervention, and Prevention Documents  
22  
23 2006;**Paper 19**  
24
- 25 35. Arber S, Gilbert GN, Dale A. Paid employment and women's health: a benefit or a source of role  
26  
27 strain? *SOCIOL HEALTH ILL* 1985;**7**(3):375-400  
28
- 29 36. Repetti RL, Matthews KA, Waldron I. Employment and women's health: Effects of paid  
30  
31 employment on women's mental and physical health. *AM PSYCHOL* 1989;**44**(11):1394-401  
32
- 33 37. Krishnan S, Cozier YC, Rosenberg L, Palmer JR. Socioeconomic Status and Incidence of Type 2  
34  
35 Diabetes: Results From the Black Women's Health Study. *American Journal of Epidemiology*  
36  
37 2010;**171**(5):564-70 doi: 10.1093/aje/kwp443[published Online First: Epub Date].  
38
- 39 38. King T, Kavanagh AM, Jolley D, Turrell G, Crawford D. Weight and place: a multilevel cross-  
40  
41 sectional survey of area-level social disadvantage and overweight//obesity in Australia. *INT J*  
42  
43 *OBES* 2005;**30**(2):281-87  
44
- 45 39. Robert SA, Reither EN. A multilevel analysis of race, community disadvantage, and body mass  
46  
47 index among adults in the US. *SOC SCI MED* 2004;**59**(12):2421-34  
48
- 49 40. MacIntyre S, Hunt K. Socio-economic Position, Gender and Health. *Journal of Health Psychology*  
50  
51 1997;**2**(3):315-34  
52
- 53 41. Okura Y, Urban LH, Mahoney DW, Jacobsen SJ, Rodeheffer RJ. Agreement between self-report  
54  
55 questionnaires and medical record data was substantial for diabetes, hypertension, myocardial  
56  
57 infarction and stroke but not for heart failure. *J CLIN EPIDEMIOL* 2004;**57**(10):1096-103  
58  
59  
60

- 1  
2  
3 42. Jackson JM, DeFor TA, Crain AL, et al. Self-reported diabetes is a valid outcome in pragmatic  
4  
5 clinical trials and observational studies. *Journal of Clinical Epidemiology* 2013;**66**(3):349-50  
6  
7 43. Kawachi I, Berkman LF. Introduction. In: Kawachi I, Berkman LF, eds. *Neighborhoods and*  
8  
9 *Health*. Oxford: Oxford University Press, 2003.  
10  
11 44. Diez Roux AV. Estimating neighborhood health effects: the challenges of causal inference in a  
12  
13 complex world. *SOC SCI MED* 2004;**58**(10):1953-60  
14  
15 45. Sampson RJ. Neighborhood-Level Context and Health: Lessons from Sociology. In: Kawachi I,  
16  
17 Berkman LF, eds. *Neighborhoods and Health*. Oxford: Oxford University Press, 2003.  
18  
19 46. Yen IH, Kaplan GA. Neighborhood social environment and risk of death: Multilevel evidence  
20  
21 from the Alameda County Study. *AM J EPIDEMIOL* 1999;**149**(10):898-907  
22  
23  
24  
25  
26  
27  
28  
29  
30  
31  
32  
33  
34  
35  
36  
37  
38  
39  
40  
41  
42  
43  
44  
45  
46  
47  
48  
49  
50  
51  
52  
53  
54  
55  
56  
57  
58  
59  
60

1  
2  
3 **Gender Differences in The Association of Individual Social Class And Neighborhood**  
4 **Unemployment Rate With Prevalent Type 2 Diabetes Mellitus: A Cross-sectional Study from**  
5 **The DIAB-CORE Consortium**  
6  
7  
8

9 **Short title: Gender Differences in the Association of Socio-Economic Factors With Diabetes**  
10

11  
12 Grit Müller<sup>1</sup>, Saskia Hartwig<sup>2</sup>, Karin Halina Greiser<sup>2,3</sup>, Susanne Moebus<sup>4</sup>, Noreen Pundt<sup>4</sup>, Sabine  
13 Schipf<sup>5</sup>, Henry Völzke<sup>5</sup>, Werner Maier<sup>6</sup>, Christa Meisinger<sup>7</sup>, Teresa Tamayo<sup>8</sup>, Wolfgang Rathmann<sup>8</sup>,  
14 Klaus Berger<sup>1</sup>, for the DIAB-CORE Consortium  
15  
16

17  
18  
19 <sup>1</sup> Institute of Epidemiology and Social Medicine, University of Muenster, Germany

20 <sup>2</sup> Institute of Medical Epidemiology, Biostatistics and Informatics, Martin-Luther-University Halle-  
21 Wittenberg, Halle (Saale), Germany  
22

23 <sup>3</sup> Division of Cancer Epidemiology, German Cancer Research Center (DKFZ), Heidelberg, Germany

24 <sup>4</sup> Institute for Medical Informatics, Biometry and Epidemiology, University Hospital of Essen,  
25 University Duisburg-Essen, Essen, Germany

26 <sup>5</sup> Institute for Community Medicine, University Medicine Greifswald, Greifswald, Germany

27 <sup>6</sup> Helmholtz Zentrum München, German Research Center for Environmental Health (GmbH), Institute  
28 of Health Economics and Health Care Management, Neuherberg, Germany

29 <sup>7</sup> Helmholtz Zentrum München, German Research Center for Environmental Health (GmbH), Institute  
30 of Epidemiology II, Neuherberg, Germany

31 <sup>8</sup> Institute of Biometrics and Epidemiology, German Diabetes Center, Leibniz Center for Diabetes  
32 Research at Heinrich-Heine-University, Düsseldorf, Germany  
33  
34

35  
36 Corresponding author:

37 Address: Grit Mueller  
38 Institute of Epidemiology and Social Medicine  
39 University of Muenster  
40 Domagkstraße 3  
41 48149 Muenster  
42 Germany

43 Email: muellegr@uni-muenster.de

44 Fon: 0049-251-83-55649

45 Fax: 0049-251-83-55300  
46  
47  
48  
49  
50

51 **Keywords:** Type 2 Diabetes mellitus, Gender, Multilevel Analysis, Residence Characteristics,  
52 Socioeconomic Factors, Population-based  
53

54 **Word count:** 3632  
55  
56  
57  
58  
59  
60

1  
2  
3 **Abstract** (word count: 256; max. 300)  
4  
5  
6

7 **Objective:** To analyze gender differences in the relationship of individual social class, employment  
8 status and neighborhood unemployment rate with present type 2 diabetes mellitus (T2DM).  
9

10  
11 **Design:** Five cross-sectional studies.

12  
13 **Setting:** Studies were conducted in five regions of Germany from 1997-2006.

14  
15 **Participants:** The sample consisted of 8,870 individuals residing in 226 neighborhoods in five urban  
16 regions.  
17

18  
19 **Primary and secondary outcome measures:** Prevalent T2DM.

20  
21 **Results:** We found significant multiplicative interactions between gender and the individual variables  
22 social class and employment status (being unemployed, retired). Social class was statistically  
23 significant associated with T2DM in men and women, whereby this association was stronger in  
24 women (low versus high social class: odds ratio (OR) 2.68 (95% confidence intervals (CI): 1.66-4.34))  
25 than men (low versus high social class: OR 1.75 (95% CI: 1.20-2.54)). Significant associations of  
26 employment status and T2DM were only found in women (unemployed versus employed: OR 1.73  
27 (95% CI: 1.02-2.92); retired versus employed: OR 1.77 (95% CI: 1.10-2.84); others versus employed:  
28 OR 1.64 (95% CI: 1.01-2.67)). Neighborhood unemployment rate was associated with T2DM in men  
29 (highest versus lowest tertile: OR 1.52 (95% CI: 1.18-1.96)). Between-study and between-  
30 neighborhood variation in the T2DM prevalence was more pronounced in women. The considered  
31 covariates helped to explain statistically the variation in the T2DM prevalence among men, but not  
32 among women.  
33  
34  
35  
36  
37  
38  
39  
40  
41  
42  
43  
44

45 **Conclusions:** Social class was inversely associated with T2DM in both men and women, whereby the  
46 association was more pronounced in women. Employment status only affected T2DM in women.  
47  
48 Neighborhood unemployment rate is an important predictor of T2DM in men, but not in women.  
49  
50  
51  
52  
53  
54  
55  
56  
57  
58  
59  
60



## Article Summary

### Article focus

- The aim of this study was to examine disparities in the association of individual social class, employment status and neighborhood unemployment rate with prevalent T2DM by gender in a pooled analysis of five population-based regional studies.

### Key messages

- Social class was statistically significantly associated with T2DM among women and men, however, the association was stronger in women than men; particularly the individual employment status is an important determinant of T2DM in women.
- Between-study and between-neighborhood variance in T2DM was more pronounced in women, as already observed for obesity.
- Neighborhood unemployment rate is only associated with T2DM in men after the adjustment for individual variables.

### Strength and limitations of this study

- Data of five population-based representative studies linking data on the prevalence of T2DM to small areas and regions were applied.
- This study adds knowledge to the research on the interaction of gender, social determinants on different levels and health.
- Limitations were as follows: The cross-sectional design does not allow causal conclusions; T2DM was based on a self-reported physician's diagnosis; Administrative definitions of neighborhoods could result in exposure misclassification and underestimation of neighborhood effects; Problem of residential selection.

**List of Abbreviations**

|           |                                                                |
|-----------|----------------------------------------------------------------|
| CARLA     | Cardiovascular Disease, Living and Ageing in Halle Study       |
| CI        | Confidence Interval                                            |
| DHS       | Dortmund Health Study                                          |
| DIAB-CORE | Diabetes Collaborative Research of Epidemiologic Studies       |
| HNR       | Heinz Nixdorf Recall Study                                     |
| KORA S4   | Cooperative Health Research in the Region of Augsburg Survey 4 |
| MOR       | Median Odds Ratio                                              |
| OR        | Odds Ratio                                                     |
| SD        | Standard Deviation                                             |
| SE        | Standard Error                                                 |
| SHIP      | Study of Health in Pomerania                                   |
| T2DM      | Type 2 Diabetes Mellitus                                       |
| $V_A$     | Area-Level Variance                                            |

## Introduction

Gender differences in health inequality vary by the studied health outcome, the measure of social status and the stage of life course [1-3]. A systematic review of 23 case-control and cohort studies on socio-economic differences in the incidence of type 2 diabetes mellitus (T2DM) concluded that inequality in the risk of T2DM was stronger in women than men [4]. For instance, Smith et al. examined the association between the life-course socio-economic position and T2DM in the Framingham Offspring Study and detected a significant association among women but not among men [5]. Similar results were shown by Imkampe et al. [6].

Tanaka et al. [7] found associations among both men and women: With an increasing level of wealth the authors presented an increasing odds of T2DM in men and women in an older population aged 50+, but the association was more pronounced in women. Differentiating by ethnicity, Robbins et al. reported a significant association between SES and T2DM among Caucasian and African American women but an inconsistent relationship in Caucasian and African American men [8]. Tang et al. [9] and Ross et al. [10] found as well weak association between measures of social status and T2DM in men.

Contrasting results were found by Kumari et al. [11] and Maty et al. [12]. The first study presented a stronger inverse relationship between the civil service employment grade and the incidence of T2DM in men, applying data of the Whitehall study II. The latter work reported higher T2DM risks for blue-collar men than women in comparison to white-collar employees.

Beyond an individual's social class, socio-economic characteristics of the neighborhood affect health [13-15]. As part of the Diabetes Collaborative Research of Epidemiologic Studies (DIAB-CORE) in Germany, Schipf et al. reported regional disparities in the age-standardized prevalence of T2DM [16]. In two recent studies, we found that the prevalence of T2DM varied across regions in Germany, even after adjustment for individual characteristics. These variations could in part be explained statistically by neighborhood unemployment rate within cities or by regional deprivation [17 18].

Gender differences may arise out of different exposures to social, psychosocial and behavioral determinants of health ("differential exposure hypothesis"). Another explanation might be a different vulnerability to health determinants, characteristics of the neighborhood and reaction to material,

1  
2  
3 behavioral and psychosocial conditions of men and women (“differential vulnerability hypothesis”) [2  
4 19]. Differences in men’s and women’s perception of the **neighborhood context** and social status may  
5 be as well a source of **health disparities** [19]. Stafford et al. examined gender differences in the  
6 relationship between self-rated health and the neighborhood context **and found a larger impact of the**  
7 **neighborhood context** on the health of women [19].

8  
9  
10  
11  
12 The aim of this study was (1) to investigate if the association of **individual social class, individual**  
13 **employment status and neighborhood unemployment rate** with prevalent T2DM differs for men and  
14 women in a pooled analysis of five population-based regional studies; **and** (2) to examine the extent to  
15 which the prevalence of T2DM varies by gender between neighborhoods and regions in **Germany**. **In a**  
16 **sub-analysis, we performed study-specific calculations of the relationship between T2DM and social**  
17 **class in men and women.**

## 28 **Methods**

29  
30 Within the DIAB-CORE, cross-sectional data of five regional studies were pooled: the Cardiovascular  
31 Disease, Living and Ageing in Halle Study (CARLA), the Dortmund Health Study (DHS), the Heinz  
32 Nixdorf Recall Study (HNR), the Cooperative Health Research in the Region of Augsburg (KORA)  
33 S4 Study, and the Study of Health in Pomerania (SHIP). Data collection was conducted between 1997  
34 and 2006. The studies have similar study designs (population-based), sampling procedures (two-stage  
35 cluster or stratified random sampling) and response proportions (56%-69%). **The studies were**  
36 **approved by local ethics committees and informed written consent was obtained from the study**  
37 **participants.** Within the five studies, similar instruments, questionnaires and medical measurements  
38 were applied to collect data. Study designs have been described elsewhere in more detail [20-24].

39  
40  
41  
42  
43  
44  
45  
46  
47 In brief, data on 11,688 subjects aged 45-74 years were provided. 2,281 individuals living in rural  
48 areas of KORA and SHIP were excluded from the sample, **because these subject could not be assigned**  
49 **to spatial units below the level of municipalities; so, that our study was limited to urban areas.** Study  
50 participants were assigned to neighborhoods via addresses of residence at baseline (eight subjects  
51 could not be linked). The neighborhoods were defined by administrative units: statistical  
52 administrative units (subdivision of city districts) in HNR and DHS, city districts in CARLA, planning  
53  
54  
55  
56  
57  
58  
59  
60

1  
2  
3 regions (summary of city districts) in KORA and postal code areas in SHIP. The 9,399 study  
4 participants of the sample resided in 227 neighborhoods of the total 236 neighborhoods in the five  
5 study regions. After further exclusion of participants with missing information on individual  
6 characteristics (n=529), the final sample consisted of 8,870 residents in 226 neighborhoods.

7  
8  
9  
10  
11 Based on the definition of the DIAB-CORE Consortium [25], a T2DM case was defined as self-  
12 reported physician-diagnosed T2DM or self-reported T2DM treatment (insulin, oral anti-diabetic  
13 agents, dietary treatment). Subjects reporting an age at diagnosis of 30 years or younger were excluded  
14 from the analyses to avoid inclusion of possible cases of type 1 diabetes.

15  
16  
17  
18  
19 Social class was measured with a summary score of income and education. Its' operationalization  
20 was derived from the Winkler-Index of Socioeconomic Status [26], which summarizes information on  
21 individual educational and professional attainment, net household income and the occupational  
22 position of the main earner of a household. The three dimensions are transformed to an ordinal scale  
23 ranging from 1 to 7 and summed up to an index with a scale from 3 to 21 points. Since the information  
24 on occupational status was not available for our analysis, the index was solely based on education and  
25 income, ranging between 2 and 14 points. The index was divided into three groups: high social class,  
26 medium social class and low social class. Study participants were classified in four employment status  
27 groups: employed, retired and unemployed individuals as well as persons with other forms of  
28 employment, including participants in vocational retraining, housewives and housemen.

29  
30  
31  
32  
33  
34  
35  
36  
37  
38  
39  
40  
41  
42  
43  
44  
45  
46  
47  
48  
49  
50  
51  
52  
53  
54  
55  
56  
57  
58  
59  
60  
Neighborhood unemployment rate was applied as a proxy for the socio-economic status of the  
neighborhoods. Neighborhood unemployment rate was calculated as the number of unemployed  
residents in relation to the working-age population (15-64 years of age), obtained from the statistical  
offices of each considered city. The median year of the data collection period of each study was used  
as the reference year. A number of studies applied unemployment rate as a measure of deprivation and  
it was proven to be a strong predictor of health outcomes [22 27-29]. Campbell et al. highlighted that  
unemployment rate is a simple and good indicator for social and material deprivation, which is  
regularly updated and easily accessible [30]. For our analysis, equally-sized tertiles of study-specific  
neighborhood unemployment rate were used to detect a potential dose-response relationship.

1  
2  
3 The variable marital status summarized information whether a study participant lived with or without a  
4 partner. Moreover, life style variables including smoking status (current smoker; former smoker; never  
5 smoker), physical exercise (exercise; no exercise), body mass index (BMI) ( $<30 \text{ kg/m}^2$ ;  $\geq 30 \text{ kg/m}^2$ )  
6 and alcohol consumption (no or moderate intake: women:  $\leq 20$  grams per day; men:  $\leq 40$  grams per  
7 day; high intake: women:  $>20$  grams per day; men:  $>40$  grams per day) were considered. Exercising  
8 included any exercise irrespective of frequency and duration. All variables were constructed following  
9 DIAB-CORE standard procedures for the homogenization of basic variables to ensure a high degree of  
10 comparability.  
11  
12  
13  
14  
15  
16  
17  
18  
19

### 20 21 **Statistical Analysis**

22  
23 Descriptive analysis included the calculation of crude and age-adjusted prevalence of T2DM (derived  
24 from a logistic regression) and corresponding 95% confidence intervals (CI) by gender for individual  
25 variables and neighborhood unemployment rate.  
26  
27  
28

29 Our data set had a hierarchical structure including individuals (level 1), nested within neighborhoods  
30 (level 2), which were nested in study regions (level 3). To account for this data structure in our  
31 statistical analysis, multi-level modeling methods were applied. We conducted a series of mixed  
32 effects logistic regression models. First, we tested for interactions between gender and individual  
33 social class, employment status and neighborhood unemployment rate. To do so, we estimated  
34 regression models including terms for gender and social class, employment status or neighborhood  
35 unemployment rate as main effects and an interaction term for the effect of social class, employment  
36 status or neighborhood unemployment rate by gender. Second, gender-stratified analyses were  
37 conducted with a stepwise modeling strategy. The models were adjusted for the confounding variables  
38 age, marital status and the remaining social variables (social class/ employment status/ neighborhood  
39 unemployment rate) depending on the variable of interest. Life style factors, including smoking,  
40 alcohol consumption, BMI and physical activity were evaluated as potential mediators in the  
41 relationship between T2DM and individual social class, employment status or neighborhood  
42 unemployment rate. The results were presented as odds ratios (OR) with corresponding 95% CI.  
43  
44  
45  
46  
47  
48  
49  
50  
51  
52  
53  
54  
55  
56  
57  
58  
59  
60

1  
2  
3 Random effects were included to capture between-study and between-neighborhood variance reported  
4 as median odds ratios (MOR). The latter represents a transformation of the area-level variation ( $V_A$ ) on  
5 an OR-scale. The MOR gives the median value of all ORs between a randomly chosen highest- and  
6 lowest-risk-area. The MOR was calculated on the level of neighborhoods and study regions with the  
7 following equation:  $MOR = \exp(\sqrt{(2 * V_A)} * 0.6745)$ , where 0.6745 is the 75<sup>th</sup> centile of the  
8 cumulative distribution function of the normal distribution with mean zero and variance one [31 32].

9  
10  
11 Study-specific analyses were performed and analyzed with meta-analytical tools. Due to the small  
12 number of cases, the social class variable had to be applied as a continuous measure in this sub-  
13 analysis (ranging between two points, highest social class, and 14 points, lowest social class). For this  
14 purpose, inverse-variance weighting was used to estimate fixed and random effects summary estimates  
15 and displayed in forest plots [33]. Q-statistic and  $I^2$  index were applied to assess heterogeneity and the  
16 extent of heterogeneity between study results respectively [34]. Analyses were performed in STATA/  
17 SE 11.0.

## 31 Results

32  
33 In total, 8,870 subjects residing in 226 neighborhoods in five urban regions were included in our  
34 analysis. Characteristics of the five studies are displayed in table 1. The crude T2DM prevalence was  
35 statistically significantly lower among women than men, 7.5% (95% CI 6.7-8.3) versus 10.0% (95%  
36 CI 9.2-10.9) (significance derived from 95% CI). This pattern was observed in all five regional  
37 studies. Socio-demographic characteristics are reported in table 2. Women belonged more often to the  
38 low or medium social class and a higher proportion was not employed compared to men, except in  
39 SHIP. A higher proportion of women than men reported to live without a partner.

40  
41 The age-adjusted prevalence of T2DM was statistically significantly lower in high social class women  
42 and men than in the low social class (4.7% (95% CI: 3.9-5.7) respectively 9.7% (95% CI: 8.2-11.4) in  
43 women; 6.9% (95% CI: 5.9-8.1) respectively 14.1% (95% CI: 11.8-16.7) in men) (table 3). Women  
44 had a statistically significantly lower age-adjusted T2DM prevalence than men over all social classes.  
45 Employed men had a statistically significantly lower age-adjusted T2DM prevalence with 7.3% (95%  
46 CI: 6.2-8.7) than retired men with 10.2% (95% CI: 8.8-11.7). Across neighborhoods, the highest age-

1  
2  
3 adjusted prevalence of T2DM was found in women and men living in neighborhoods with a high  
4 unemployment rate (8.3% (95% CI: 7.2-9.5), respectively 10.9% (95% CI: 9.6-12.3)). Individuals  
5  
6 living without a partner showed statistically significantly higher prevalence than individuals who lived  
7  
8 with a partner irrespective of gender. Being physical inactive or having a BMI of 30 or above was  
9  
10 statistically significantly associated with a higher T2DM prevalence in men and women.

11  
12 In the fully adjusted multivariable analyses, the interaction terms of social class and gender were  
13  
14 statistically significant. Among the employment status, we found significant multiplicative interactions  
15  
16 between unemployed individuals and gender as well as between retired individuals and gender. The  
17  
18 interaction terms between neighborhood unemployment rate and gender were not statistically  
19  
20 significant.

21  
22  
23 The results of the gender-stratified multivariable regression analysis are presented in table 4. Among  
24  
25 women and men, we found a statistically significant association of social class and T2DM. The social  
26  
27 gradient in the odds of T2DM was reduced when the models were adjusted for age and the  
28  
29 confounding variables. This reduction was particularly large in women. Overall, the association  
30  
31 between social class and T2DM was stronger in women (low versus high social class: OR 2.68 (95%  
32  
33 CI: 1.66-4.34); medium versus high social class: OR 2.02 (95% CI: 1.31-3.13)) than men (low versus  
34  
35 high social class: OR 1.75 (95% CI: 1.20-2.54); medium versus high social class: OR 1.13 (95% CI:  
36  
37 0.89-1.43)) (model 3, table 4). Significant associations of employment status and T2DM were only  
38  
39 found in women: In reference to employed women, unemployed women, retired women and women  
40  
41 with other employment status had a 1.73, (95% CI: 1.02-2.92), a 1.77 (95% CI: 1.10-2.84)  
42  
43 respectively a 1.64 (95% CI: 1.01-2.67)) higher odds to have T2DM. The significant elevated odds of  
44  
45 T2DM in retired men were dissolved by adjustment for age. Women residing in neighborhoods with a  
46  
47 medium level of unemployment showed a significant elevated odds to have T2DM (OR 1.45 (95% CI:  
48  
49 1.03-2.04), model 2), which was dissolved when the model was adjusted by confounding variables. In  
50  
51 contrast, men residing in neighborhoods with a high level of unemployment showed a 52% (95% CI:  
52  
53 1.18-1.96) higher odds to have T2DM than men in low unemployment neighborhoods in the  
54  
55 confounder-adjusted model 3. T2DM was no longer associated with marital status after adjustment by  
56  
57  
58  
59  
60



1  
2  
3 confounding variables in model 3 (living without versus living with a partner: OR 1.17 (95% CI: 0.90-  
4 1.51) in women, OR 1.19 (95% CI: 0.88-1.59) in men).

5  
6 In model 4, the life style factors BMI, physical activity and smoking (only men) were introduced in  
7 the model. These life style factors were previously evaluated to be associated with social class,  
8 employment status (not associated with physical exercise in women) and neighborhood unemployment  
9 rate as well with the presence of type 2 diabetes (smoking only in men). In men and women, we  
10 observed effect modifications among individual social class, employment status and neighborhood  
11 unemployment rate when introducing these life style factors into the analysis. Especially, the  
12 association between social class and T2DM was strongly reduced in women mainly accounted by the  
13 BMI.  
14

15  
16 Between-study and between-neighborhood variation in the prevalence of T2DM was larger in women  
17 than men. The prevalence of T2DM in men varied only between study regions (model 1: MOR: 1.21;  
18  $V_A$ : 0.04; SE: 0.04), which was fully explained statistically by age, social class, employment status,  
19 neighborhood unemployment rate, marital status and life style factors. The T2DM prevalence in  
20 women showed large variation across neighborhoods (model 1: MOR: 1.47;  $V_A$ : 0.16; SE: 0.10) and  
21 study regions (model 1: MOR: 1.31;  $V_A$ : 0.08; SE: 0.07), which was not dissolved by the considered  
22 explanatory variables (model 4, between-neighborhood variation: MOR: 1.42;  $V_A$ : 0.13; SE: 0.10,  
23 between-study variation: MOR: 1.27;  $V_A$ : 0.06; SE: 0.06).  
24

25  
26 Regarding gender differences in health inequalities across regions, the effect estimates of the five  
27 studies were tested to be homogenous (figure 1). A low social class was associated with a higher odds  
28 of T2DM, adjusted for age, employment status, marital status and neighborhood unemployment rate.  
29 In women, an increase of one point on the social class score (decrease in social class) was associated  
30 with an increase of 13% (pooled OR: 1.13 (95% CI: 1.06-1.21);  $I^2=14.0%$ ;  $p=0.325$ ) in the odds of  
31 having T2DM. This association was smaller in men (pooled OR: 1.05 (95% CI: 1.00-1.10);  $I^2=0.0%$ ;  
32  $p=0.543$ ), although the differences between genders were not significant. This was observed in all  
33 studies, except CARLA.  
34  
35  
36  
37  
38  
39  
40  
41  
42  
43  
44  
45  
46  
47  
48  
49  
50  
51  
52  
53  
54  
55  
56  
57  
58  
59  
60

## Discussion

This study assessed gender differences in the association of individual social class, employment status and neighborhood unemployment rate with prevalent T2DM, using data from five regional population-based studies in Germany. Women and men belonging to the low social class had a higher prevalence of T2DM. We found that the gradient in the prevalence of T2DM across social classes was clearly stronger in women than men. This pattern was consistent across all regions but CARLA and in line with results of prior studies presenting only associations in women [6 9 10], or in men and women but more pronounced in women [7 8].

In our study, the individual employment status was only associated with T2DM in women. Being unemployed, retired or a housewife yielded higher odds of T2DM. However, since we were not able to consider occupational position in our analyses, the interpretation of these findings is limited. In the literature, two contrasting theories are discussed for the effects of paid employment on women's health. Employment can have a health promoting function due to role accumulation in contrast to the monotony, isolation, low status and self-esteem of housewives. A health damaging effect could arise due to role strains, e.g. stress due to multiple roles, and heavy job demands [35 36].

Men residing in neighborhoods with a high level of unemployment rate were more likely to have T2DM than men in better-off neighborhoods. These effects remained even after adjustment for confounding and mediator variables, whereas associations between neighborhood unemployment rate and T2DM in women were dissolved by the introduction of confounding variables. These deviating effects of neighborhood unemployment rate between men and women may be explained by the fact that men were more often engaged in employment and, hence, depend more on the regional labor market and its employment opportunities than women. Potential underlying mechanisms in the relationship between neighborhood unemployment and T2DM include neighborhood resources such as the availability of grocery stores offering healthy food and recreational facilities [15], the adoption and maintenance of risky health behavior and psychosocial factors such as chronic stress [13 37].

Between-study and between-neighborhood variation in the prevalence of T2DM was larger in women than men. We found that individual social class, employment status and neighborhood unemployment rate played an important role in explaining statistically regional differences in the prevalence of T2DM

1  
2  
3 in men. A large fraction of the detected variation in the prevalence of T2DM on the level of  
4  
5 neighborhoods and regions remained statistically unexplained in women, suggesting that there were  
6  
7 characteristics on the individual, neighborhood and regional level that determine the presence of  
8  
9 T2DM and which were not considered in our analysis. Previous work on regional variation in self-  
10  
11 rated health and BMI also found larger regional variation in women [19 38 39].

12  
13 The gender-specific pattern in the association between social class and the prevalence of T2DM need  
14  
15 to be further explored, since the pathways are still unknown [8]. Macintyre et al. noted that socio-  
16  
17 economic determinants vary in their meaning for men and women, since both genders are socialized in  
18  
19 different ways with diverging social roles and coping strategies against stress; they hold different  
20  
21 occupational positions in the labor market and have dissimilar access to material and psycho-social  
22  
23 resources [40]. In our study, overall women were less likely to be in the high social class and were less  
24  
25 often employed.

26  
27 To gain more insight in mechanisms of social inequalities on health, the analysis of population  
28  
29 subgroups is essential, since one limitation of the existing literature is the assumption that mechanisms  
30  
31 operate identically in different population groups [19]. This work adds knowledge to the research on  
32  
33 the interaction of gender, social determinants and health. So far, only few studies examined this  
34  
35 interaction with regard to T2DM and to our knowledge no study considered neighborhood  
36  
37 unemployment rate in regard to that, so far. Data sources providing representative population-based  
38  
39 data on the prevalence of T2DM with a linkage to small areas and regions are still rare.

40  
41 Some limitations of this work should be acknowledged. We analyzed cross-sectional data with limited  
42  
43 causal conclusions. We could not use occupation as an indicator of social class in our analysis since  
44  
45 the assessment was not comparable between studies. The prevalence of T2DM was based on a self-  
46  
47 reported T2DM physician's diagnosis only, which could not be validated. Therefore, undetected type 2  
48  
49 diabetes could be a source of bias. However, Okura et al. found a high accuracy between self-reports  
50  
51 and medical records for diabetes and other chronic diseases [41]. Recently, Jackson et al. concluded  
52  
53 that self-reported diabetes is a valid outcome for observational studies from an accuracy of 91.8% of  
54  
55 self-reported prevalent diabetes validated by medical records based on the Women's Health Initiative  
56  
57 [42]. Another potential limitation is the selection by response (response proportions: 56%-69%),  
58  
59  
60

1  
2  
3 which might have affected our results. The exclusion of participants from the initial sample due to  
4 missing information on individual characteristics (mainly due to missing information on net household  
5 income) could have led to an underestimation of the social gradient in T2DM, because these subjects  
6 were on average older, more often female, out of employment and with a lower educational status.  
7 However, a sensitivity analysis showed similar results applying education as measure of social class.  
8

9  
10 We used administrative definitions for neighborhoods. Hence, neighborhoods in our study may not  
11 capture the immediate neighborhood of residence of our study participants. This could lead to  
12 exposure misclassification and underestimation of neighborhood effects [43]. The applied  
13 administrative definition of neighborhoods differed between studies and neighborhoods were diverse  
14 according to their area and population size. Another challenge in the research of neighborhood impact  
15 on health is the residential selection. Individuals may be selected into neighborhoods due to their  
16 individual characteristics, such as residents of poor areas cannot afford moving to better-off  
17 neighborhoods [44 45]. Finally, we had no information on the residential history of the study  
18 participants, which could result in an underestimation of neighborhood effects on health [46].  
19  
20  
21  
22  
23  
24  
25  
26  
27  
28  
29  
30  
31  
32

33 In conclusion, our study identified different relationships of individual social class, employment status  
34 and neighborhood unemployment rate with the prevalence of T2DM for women and men. In both men  
35 and women, the prevalence of T2DM was inversely related to social class. This social gradient was  
36 stronger in women. Regional variance in the T2DM prevalence was larger in women than men.  
37 Whereas the major proportion of the variance in the T2DM prevalence remained statistically  
38 unexplained in women, the regional variance in men was low and completely explained by the  
39 considered variables.  
40  
41  
42  
43  
44  
45  
46  
47  
48  
49  
50  
51  
52  
53  
54  
55  
56  
57  
58  
59  
60

Table 1: Characteristics of The Five Studies (CARLA, DHS, KORA, HNR, and SHIP studies, Germany, 1997-2006)<sup>a</sup>

|                                           | CARLA                      | DHS                                 | KORA                       | HNR                                  | SHIP                                   |
|-------------------------------------------|----------------------------|-------------------------------------|----------------------------|--------------------------------------|----------------------------------------|
| Federal State (Region)                    | Saxony-Anhalt (east)       | North Rhine-Westphalia (west)       | Bavaria (south)            | North Rhine-Westphalia (west)        | Mecklenburg-West Pomerania (northeast) |
| Sampling                                  | stratified random sampling | stratified random sampling          | two-stage cluster sampling | stratified random sampling           | two-stage cluster sampling             |
| Cities                                    | Halle (Saale)              | Dortmund                            | Augsburg                   | Bochum, Essen, Mülheim               | Greifswald, Stralsund                  |
| Neighborhoods (n)                         | 43 city districts          | 62 statistical administrative units | 17 planning regions        | 108 statistical administrative units | 6 clusters of city districts           |
| Corresponding year                        | 2003                       | 2003                                | 2000                       | 2000/ 2001                           | 1999 (2003)                            |
| Total population (neighborhood range)     | 238,078 (18 - 19,210)      | 587,607 (476 - 25,686)              | 252,725 (2,730 - 37,246)   | 1,142,112 (262 - 32,466)             | 115,962 (5,230 - 31,154)               |
| Unemployment rate (%; neighborhood range) | 14.1 (3.9 - 22.5)          | 15.3 (5.0 - 27.7)                   | 4.8 (1.9 - 7.6)            | 7.5 (1.7 - 13.5)                     | 13.1 (9.9 - 14.9)                      |

<sup>a</sup> the Cardiovascular Disease, Living and Ageing in Halle Study (CARLA), the Dortmund Health Study (DHS), the Heinz Nixdorf Recall Study (HNR), the Cooperative Health Research in the Region of Augsburg (KORA) S4 Study, and the Study of Health in Pomerania (SHIP)

Table 2: Socio-demographic Characteristics of Men And Women in The Five Population-Based Studies (CARLA, DHS, KORA, HNR, SHIP, Germany, 1997-2006)<sup>a</sup>

| Study                                                           | CARLA            |                 | DHS             |                | KORA            |               | HNR             |               | SHIP            |                |
|-----------------------------------------------------------------|------------------|-----------------|-----------------|----------------|-----------------|---------------|-----------------|---------------|-----------------|----------------|
|                                                                 | men              | women           | men             | women          | men             | women         | men             | women         | men             | women          |
| <b>Study period</b>                                             | 12/2002-01/2006  |                 | 09/2003-06/2004 |                | 10/1999-04/2001 |               | 12/2000-06/2003 |               | 10/1997-03/2001 |                |
| <b>Participants 45-74 with full information</b>                 | 719              | 638             | 414             | 411            | 532             | 494           | 2,257           | 2,175         | 615             | 615            |
| <b>Number of neighborhoods (range of residing participants)</b> | 37 (3-139)       |                 | 60 (1-42)       |                | 17 (13-141)     |               | 106 (1-140)     |               | 6 (95-396)      |                |
| <b>Crude diabetes prevalence (%) (95% CI)</b>                   | 12.9 (10.6-15.6) | 12.1 (9.6-14.9) | 11.8 (8.9-15.3) | 7.8 (5.4-10.8) | 7.0 (4.9-9.5)   | 5.5 (3.6-7.9) | 8.9 (7.8-10.2)  | 5.9 (5.0-7.0) | 11.7 (9.3-14.5) | 9.6 (7.4-12.2) |
| <b>Mean age (SD)</b>                                            | 61.0 (8.0)       | 60.4 (7.8)      | 60.9 (8.4)      | 59.7 (8.5)     | 58.9 (8.6)      | 58.8 (8.4)    | 59.53 (7.8)     | 59.4 (7.81)   | 60.3 (8.3)      | 58.8 (8.3)     |
| <b>Social class % (n)</b>                                       |                  |                 |                 |                |                 |               |                 |               |                 |                |
| lower                                                           | 7.4 (53)         | 13.0 (83)       | 11.1 (46)       | 23.8 (98)      | 5.8 (31)        | 16.4 (81)     | 6.2 (140)       | 19.7 (429)    | 12.2 (75)       | 26.0 (160)     |
| middle                                                          | 61.3 (441)       | 65.1 (415)      | 46.1 (191)      | 46.2 (190)     | 48.5 (258)      | 54.1 (267)    | 53.0 (1195)     | 55.9 (1215)   | 67.3 (414)      | 63.1 (388)     |
| higher                                                          | 31.3 (225)       | 21.9 (140)      | 42.8 (177)      | 29.9 (123)     | 45.7 (243)      | 29.6 (146)    | 40.9 (922)      | 24.4 (531)    | 20.5 (126)      | 10.9 (67)      |
| <b>Employment status % (n)</b>                                  |                  |                 |                 |                |                 |               |                 |               |                 |                |
| employed                                                        | 34.9 (251)       | 30.6 (195)      | 38.7 (160)      | 34.8 (143)     | 50.4 (268)      | 35.0 (173)    | 46.4 (1047)     | 31.9 (693)    | 33.3 (205)      | 35.1 (216)     |
| retired                                                         | 48.1 (346)       | 52.0 (332)      | 51.9 (215)      | 33.8 (139)     | 42.9 (228)      | 39.3 (194)    | 47.6 (1075)     | 37.4 (813)    | 54.0 (332)      | 49.6 (305)     |
| unemployed                                                      | 15.2 (109)       | 12.4 (79)       | 7.3 (30)        | 6.1 (25)       | 6.4 (34)        | 8.9 (44)      | 5.7 (129)       | 7.5 (162)     | 12.4 (76)       | 14.5 (89)      |
| others                                                          | 1.8 (13)         | 5.0 (32)        | 2.2 (9)         | 25.3 (104)     | 0.4 (2)         | 16.8 (83)     | 0.3 (6)         | 23.3 (507)    | 0.3 (2)         | 0.8 (5)        |
| <b>Marital status (%)</b>                                       |                  |                 |                 |                |                 |               |                 |               |                 |                |
| living with a partner                                           | 89.0 (640)       | 73.4 (468)      | 86.7 (359)      | 71.5 (294)     | 82.5 (439)      | 67.2 (332)    | 90.2 (2035)     | 74.7 (1624)   | 88.3 (543)      | 68.8 (423)     |
| living without a partner                                        | 11.0 (79)        | 26.7 (170)      | 13.3 (55)       | 28.5 (117)     | 17.5 (93)       | 32.8 (162)    | 9.8 (222)       | 25.3 (551)    | 11.7 (72)       | 31.2 (192)     |

<sup>a</sup> the Cardiovascular Disease, Living and Ageing in Halle Study (CARLA), the Dortmund Health Study (DHS), the Heinz Nixdorf Recall Study (HNR), the Cooperative Health Research in the Region of Augsburg (KORA) S4 Study, and the Study of Health in Pomerania (SHIP)

Table 3: Gender-Stratified Crude And Age-Adjusted Prevalence of Type 2 Diabetes Mellitus by Individual Variables And Neighborhood Unemployment Rate With Data From Five Population-Based Studies (CARLA, DHS, KORA, HNR, SHIP, Germany, 1997-2006) <sup>a, b</sup>

|                          | Men  |                            |      |           |                           |           | Women |                            |      |           |                           |          |
|--------------------------|------|----------------------------|------|-----------|---------------------------|-----------|-------|----------------------------|------|-----------|---------------------------|----------|
|                          | No.  | Crude Prevalence T2D Cases | %    | 95% CI    | Age-adjusted Prevalence % | 95% CI    | No.   | Crude Prevalence T2D Cases | %    | 95% CI    | Age-adjusted Prevalence % | 95% CI   |
| <b>Social class</b>      |      |                            |      |           |                           |           |       |                            |      |           |                           |          |
| low                      | 345  | 56                         | 16.2 | 12.5-20.6 | 14.1                      | 11.8-16.7 | 851   | 104                        | 12.2 | 10.1-14.6 | 9.7                       | 8.2-11.4 |
| middle                   | 2499 | 267                        | 10.7 | 9.5-12.0  | 9.7                       | 8.7-10.8  | 2475  | 194                        | 7.8  | 6.8-9.0   | 6.6                       | 5.8-7.5  |
| high                     | 1693 | 129                        | 7.6  | 6.4-9.0   | 6.9                       | 5.9-8.1   | 1007  | 26                         | 2.6  | 1.7-3.8   | 4.7                       | 3.9-5.7  |
| <b>Employment status</b> |      |                            |      |           |                           |           |       |                            |      |           |                           |          |
| employed                 | 1931 | 126                        | 6.5  | 5.5-7.7   | 7.3                       | 6.2-8.7   | 1420  | 39                         | 2.8  | 2.0-3.7   | 5.5                       | 4.6-6.7  |
| unemployed               | 2196 | 289                        | 13.2 | 11.8-14.7 | 10.3                      | 8.0-13.2  | 1783  | 213                        | 12.0 | 10.5-13.5 | 7.9                       | 6.0-10.2 |
| retired                  | 378  | 32                         | 8.5  | 5.9-11.7  | 10.2                      | 8.8-11.7  | 399   | 26                         | 6.5  | 4.3-9.4   | 7.8                       | 6.6-9.1  |
| others                   | 32   | 5                          | 15.6 | 5.3-3.3   | 8.7                       | 6.4-11.6  | 731   | 46                         | 6.3  | 4.6-8.3   | 6.6                       | 5.0-8.6  |
| <b>Marital status</b>    |      |                            |      |           |                           |           |       |                            |      |           |                           |          |
| Living with a partner    | 4016 | 387                        | 9.6  | 8.7-10.6  | 8.7                       | 7.9-9.5   | 3141  | 199                        | 6.3  | 5.5-7.2   | 6.2                       | 5.5-7.0  |
| Living without a partner | 521  | 65                         | 12.5 | 9.8-15.6  | 11.5                      | 9.7-13.4  | 1192  | 125                        | 10.5 | 8.8-12.4  | 8.3                       | 7.1-9.6  |
| <b>Physical exercise</b> |      |                            |      |           |                           |           |       |                            |      |           |                           |          |
| physical exercise        | 2473 | 193                        | 7.8  | 6.8-8.9   | 7.4                       | 6.6-8.4   | 2262  | 136                        | 6.0  | 5.1-7.1   | 5.5                       | 4.8-6.4  |
| no physical exercise     | 2007 | 255                        | 12.7 | 11.3-14.2 | 10.9                      | 9.7-12.1  | 1989  | 178                        | 8.9  | 7.7-10.3  | 8.1                       | 7.2-9.2  |
| <b>Smoking</b>           |      |                            |      |           |                           |           |       |                            |      |           |                           |          |
| never smoked             | 1369 | 112                        | 8.2  | 6.8-9.8   | 8.3                       | 7.2-9.6   | 2502  | 208                        | 8.3  | 7.3-9.5   | 6.5                       | 5.7-7.4  |
| ex-smoker                | 1962 | 227                        | 11.6 | 10.2-13.1 | 9.6                       | 8.4-10.8  | 894   | 67                         | 7.5  | 5.9-9.4   | 7.5                       | 6.4-8.9  |
| current smoker           | 1149 | 109                        | 9.5  | 7.9-11.3  | 8.6                       | 7.3-10.1  | 855   | 39                         | 4.6  | 3.3-6.2   | 6.8                       | 5.6-8.1  |
| <b>BMI</b>               |      |                            |      |           |                           |           |       |                            |      |           |                           |          |

|                            |      |     |      |           |      |           |      |     |      |           |      |           |
|----------------------------|------|-----|------|-----------|------|-----------|------|-----|------|-----------|------|-----------|
| < 30                       | 3217 | 258 | 8.0  | 7.1-9.0   | 6.5  | 5.8-7.3   | 2993 | 123 | 4.1  | 3.4-4.9   | 4.7  | 4.1-5.4   |
| ≥ 30                       | 1263 | 190 | 15.0 | 13.1-17.1 | 15.4 | 13.7-17.2 | 1258 | 191 | 15.2 | 13.2-17.3 | 11.4 | 10.0-13.0 |
| <b>Alcohol consumption</b> |      |     |      |           |      |           |      |     |      |           |      |           |
| no or moderate intake      | 3967 | 410 | 10.3 | 9.4-11.3  | 9.2  | 8.3-10.1  | 4013 | 303 | 7.6  | 6.8-8.4   | 6.8  | 6.1-7.7   |
| high intake                | 513  | 38  | 7.4  | 5.3-10.0  | 7.3  | 5.6-9.6   | 238  | 11  | 4.6  | 2.3-8.1   | 5.5  | 4.0-7.3   |
| <b>Unemployment rate</b>   |      |     |      |           |      |           |      |     |      |           |      |           |
| low                        | 1519 | 125 | 8.2  | 6.9-9.7   | 7.4  | 6.4-8.6   | 1384 | 85  | 6.1  | 4.9-7.5   | 5.6  | 4.8-6.6   |
| mid                        | 1578 | 143 | 9.1  | 7.7-10.6  | 8.6  | 7.5-9.9   | 1527 | 120 | 7.9  | 6.6-9.3   | 6.5  | 5.6-7.6   |
| high                       | 1440 | 184 | 12.8 | 11.1-14.6 | 10.9 | 9.6-12.3  | 1422 | 119 | 8.4  | 7.0-9.9   | 8.3  | 7.2-9.5   |

<sup>a</sup> the Cardiovascular Disease, Living and Ageing in Halle Study (CARLA), the Dortmund Health Study (DHS), the Heinz Nixdorf Recall Study (HNR), the Cooperative Health Research in the Region of Augsburg (KORA) S4 Study, and the Study of Health in Pomerania (SHIP)

<sup>b</sup> Age-adjusted prevalence are derived from logistic regression models in the whole sample



Table 4: Gender-Stratified Multi-Level Logistic Regression of Type 2 Diabetes Mellitus by Individual Social Class, Employment Status and Neighborhood Unemployment Rate<sup>a, b, c</sup>

|                               |       | Social class<br>(Reference: high social class) |                  | Employment status<br>(Reference: employed) |                  |                  | Unemployment rate<br>(Reference: low unemployment rate) |                  |
|-------------------------------|-------|------------------------------------------------|------------------|--------------------------------------------|------------------|------------------|---------------------------------------------------------|------------------|
|                               |       | middle                                         | low              | retired                                    | unemployed       | others           | middle                                                  | high             |
|                               |       | OR (95% CI)                                    | OR (95% CI)      | OR (95% CI)                                | OR (95% CI)      | OR (95% CI)      | OR (95% CI)                                             | OR (95% CI)      |
| <b>Model 1<sup>d</sup></b>    | Women | 3.11 (2.04-4.73)                               | 5.37 (3.44-8.40) | 4.71 (3.31-6.69)                           | 2.36 (1.41-3.95) | 2.65 (1.69-4.14) | 1.45 (1.03-2.04)                                        | 1.26 (0.89-1.79) |
|                               | Men   | 1.42 (1.13-1.77)                               | 2.26 (1.61-3.18) | 2.13 (1.71-2.65)                           | 1.24 (0.82-1.87) | 2.37 (0.89-6.31) | 1.15 (0.89-1.48)                                        | 1.58 (1.24-2.02) |
| <b>Model 2<sup>e</sup></b>    | Women | 2.25 (1.46-3.45)                               | 3.16 (1.99-5.03) | 2.01 (1.26-3.21)                           | 2.07 (1.23-3.48) | 1.77 (1.10-2.85) | 1.45 (1.03-2.04)                                        | 1.25 (0.88-1.78) |
|                               | Men   | 1.21 (0.96-1.51)                               | 1.99 (1.41-2.81) | 1.24 (0.90-1.72)                           | 1.17 (0.77-1.76) | 1.97 (0.73-5.28) | 1.12 (0.86-1.45)                                        | 1.62 (1.26-2.70) |
| <b>Model 3<sup>f</sup></b>    | Women | 2.02 (1.31-3.13)                               | 2.68 (1.66-4.34) | 1.77 (1.10-2.84)                           | 1.73 (1.02-2.92) | 1.64 (1.01-2.67) | 1.36 (0.96-1.93)                                        | 1.13 (0.79-1.62) |
|                               | Men   | 1.13 (0.89-1.43)                               | 1.75 (1.20-2.54) | 1.09 (0.77-1.52)                           | 0.94 (0.61-1.44) | 1.99 (0.74-5.36) | 1.08 (0.83-1.40)                                        | 1.52 (1.18-1.96) |
| <b>Model 4<sup>g, h</sup></b> | Women | 1.55 (0.99-2.41)                               | 1.76 (1.07-2.90) | 1.66 (1.03-2.68)                           | 1.74 (1.02-2.98) | 1.64 (1.00-2.70) | 1.21 (0.85-1.73)                                        | 1.03 (0.71-1.48) |
|                               | Men   | 1.03 (0.81-1.31)                               | 1.49 (1.02-2.20) | 1.02 (0.72-1.44)                           | 0.91 (0.59-1.40) | 1.71 (0.63-4.66) | 1.06 (0.82-1.37)                                        | 1.45 (1.13-1.86) |

<sup>a</sup> Odds Ratios and 95% Confidence Intervals derived from Three-Level Mixed Effects Logistic Regression Models

<sup>b</sup> Data From Five Population-Based Studies: the Cardiovascular Disease, Living and Ageing in Halle Study (CARLA), the Dortmund Health Study (DHS), the Heinz Nixdorf Recall Study (HNR), the Cooperative Health Research in the Region of Augsburg (KORA) S4 Study, and the Study of Health in Pomerania (SHIP), Germany, 1997-2006

<sup>c</sup> men: n=4,537, women: n=4,333

<sup>d</sup> Model 1: unadjusted

<sup>e</sup> Model 2: adjusted by age

<sup>f</sup> Model 3: adjusted by other confounders: social class, employment status, neighborhood unemployment rate, marital status

<sup>g</sup> Model 4: adjusted by mediators: BMI, physical exercise, smoking (only for men)

1  
2  
3  
4  
5  
6  
7  
8  
9  
10  
11  
12  
13  
14  
15  
16  
17  
18  
19  
20  
21  
22  
23  
24  
25  
26  
27  
28  
29  
30  
31  
32  
33  
34  
35  
36  
37  
38  
39  
40  
41  
42  
43  
44  
45  
46  
47  
48  
49

<sup>h</sup> Sample size n=8,731 due to 139 missing values on life style factors

For peer review only

Figure 1: Meta Analysis of Five Logistic Regressions of Type 2 Diabetes Mellitus for the Social Class Score (Range: 2-14 Points) in Women and Men<sup>a, b, c, d</sup>



<sup>a</sup> Odds Ratios and 95% Confidence Intervals derived from Study-Stratified Two-Level Mixed Effects Logistic Regression Models

<sup>b</sup> Adjusted for Age, Employment Status, Marital Status and Neighborhood Unemployment Rate

<sup>c</sup> Data From Five Population-Based Studies: the Cardiovascular Disease, Living and Ageing in Halle Study (CARLA), the Dortmund Health Study (DHS), the Heinz Nixdorf Recall Study (HNR), the Cooperative Health Research in the Region of Augsburg (KORA) S4 Study, and the Study of Health in Pomerania (SHIP), Germany, 1997-2006

<sup>d</sup> Heterogeneity tested via Q-statistic and I<sup>2</sup>-index

1  
2  
3  
4  
5  
6  
7  
8  
9  
10  
11  
12  
13  
14  
15  
16  
17  
18  
19  
20  
21  
22  
23  
24  
25  
26  
27  
28  
29  
30  
31  
32  
33  
34  
35  
36  
37  
38  
39  
40  
41  
42  
43  
44  
45  
46  
47  
48  
49  
50  
51  
52  
53  
54  
55  
56  
57  
58  
59  
60

**Declaration of Competing Interests**

Nothing to declare.

For peer review only

1  
2  
3 **Data sharing statement**  
4

5 There is no additional data available.  
6  
7  
8  
9  
10  
11  
12  
13  
14  
15  
16  
17  
18  
19  
20  
21  
22  
23  
24  
25  
26  
27  
28  
29  
30  
31  
32  
33  
34  
35  
36  
37  
38  
39  
40  
41  
42  
43  
44  
45  
46  
47  
48  
49  
50  
51  
52  
53  
54  
55  
56  
57  
58  
59  
60

For peer review only

1  
2  
3  
4  
5  
6  
7  
8  
9  
10  
11  
12  
13  
14  
15  
16  
17  
18  
19  
20  
21  
22  
23  
24  
25  
26  
27  
28  
29  
30  
31  
32  
33  
34  
35  
36  
37  
38  
39  
40  
41  
42  
43  
44  
45  
46  
47  
48  
49  
50  
51  
52  
53  
54  
55  
56  
57  
58  
59  
60

**Patient consent**

Obtained.

For peer review only

**Contribution**

The authors G.M., K.B. (DHS), S.H., K.H.G. (CARLA), S.M., N.P. (HNR), S.S., H.V. (SHIP), W.M., and C.M. (KORA) researched data. G.M. developed the study conception, performed the statistical analyses and drafted the manuscript. K.B. contributed to the study conception, statistical analyses and data interpretation. W.R. and T.T. contributed to the pooling of data. All authors critically reviewed the manuscript and contributed to the interpretation of the results.

For peer review only

### Funding statement

This work was supported by the Competence Network Diabetes mellitus of the German Federal Ministry of Education and Research (BMBF, grant 01GI0814).

The Study of Health in Pomerania (SHIP) is part of the Community Medicine Research net (<http://www.community-medicine.de>) at the University of Greifswald, Germany. Funding was provided by grants from the German Federal Ministry of Education and Research (BMBF, grant 01ZZ0403); the Ministry for Education, Research, and Cultural Affairs; and the Ministry for Social Affairs of the Federal State of Mecklenburg–West Pomerania.

The Cardiovascular Disease, Living and Ageing in Halle Study (CARLA) was supported by a grant from the Deutsche Forschungsgemeinschaft as part of the Collaborative Research Center 598 “Heart failure in the elderly - cellular mechanisms and therapy” at the Medical Faculty of the Martin-Luther-University Halle-Wittenberg, by a grant of the Wilhelm-Roux Programme of the Martin-Luther-University Halle-Wittenberg; by the Ministry of Education and Cultural Affairs of Saxony-Anhalt, and by the Federal Employment Office.

The collection of socio-demographic and clinical data in the Dortmund Health Study (DHS) was supported by the German Migraine & Headache Society (DMKG) and by unrestricted grants of equal share from Astra Zeneca, Berlin Chemie, Boots Healthcare, Glaxo-Smith-Kline, McNeil Pharma (former Woelm Pharma), MSD Sharp & Dohme and Pfizer to the University of Muenster.

We thank the Heinz Nixdorf Foundation (Germany) for the generous support of the Heinz Nixdorf Recall Study (HNR). The study is also supported by the German Ministry of Education and Science. We acknowledge the support of the Sarstedt AG & Co. concerning laboratory equipment. We thank the investigative group and the study staff of the Heinz Nixdorf Recall Study.

The KORA research platform (KORA, Cooperative Health Research in the Region of Augsburg) was initiated and financed by the Helmholtz Zentrum München - German Research Center for Environmental Health, which is funded by the German Federal Ministry of Education and Research and by the State of Bavaria. The KORA Diabetes Study was partly funded by a German Research Foundation project grant to W.R. from the German Diabetes Center.



1  
2  
3 The German Diabetes Center is funded by the German Federal Ministry of Health, and the Ministry of  
4  
5 School, Science and Research of the State of North-Rhine-Westphalia.  
6  
7  
8  
9  
10  
11  
12  
13  
14  
15  
16  
17  
18  
19  
20  
21  
22  
23  
24  
25  
26  
27  
28  
29  
30  
31  
32  
33  
34  
35  
36  
37  
38  
39  
40  
41  
42  
43  
44  
45  
46  
47  
48  
49  
50  
51  
52  
53  
54  
55  
56  
57  
58  
59  
60

For peer review only

**Reference list**

1. Thurston RC, Kubzansky LD, Kawachi I, Berkman LF. Is the Association between Socioeconomic Position and Coronary Heart Disease Stronger in Women than in Men? *AM J EPIDEMIOL* 2005;**162**(1):57-65
2. Denton M, Prus S, Walters V. Gender differences in health: a Canadian study of the psychosocial, structural and behavioural determinants of health. *SOC SCI MED* 2004;**58**(12):2585-600
3. MacIntyre S, Hunt K. Socio-economic Position, Gender and Health: How Do They Interact? *J HEALTH PSYCHOL* 1997;**2**(3):315-34
4. Agardh E, Allebeck P, Hallqvist J, Moradi T, Sidorchuk A. Type 2 diabetes incidence and socio-economic position: a systematic review and meta-analysis. *International Journal of Epidemiology* 2011;**40**(3):804-18
5. Smith BT, Lynch JW, Fox CS, et al. Life-Course Socioeconomic Position and Type 2 Diabetes Mellitus. *AM J EPIDEMIOL* 2011;**173**(4):438-47
6. Imkampe AK, Gulliford MC. Increasing socio-economic inequality in type 2 diabetes prevalence—Repeated cross-sectional surveys in England 1994–2006. *EUR J PUBLIC HEALTH* 2011;**21**(4):484-90
7. Tanaka T, Gjonça E, Gulliford MC. Income, wealth and risk of diabetes among older adults: cohort study using the English longitudinal study of ageing. *EUR J PUBLIC HEALTH* 2011
8. Robbins J, Vaccarino V, Zhang H, Kasl S. Socioeconomic status and type 2 diabetes in African American and non-Hispanic white women and men: evidence from the Third National Health and Nutrition Examination Survey. *AM J PUBLIC HEALTH* 2001;**91**(1):76-83
9. Tang M, Chen Y, Krewski D. Gender-related differences in the association between socioeconomic status and self-reported diabetes. *INT J EPIDEMIOL* 2003;**32**(3):381-85
10. Ross NA, Gilmour H, Dasgupta K. 14-year diabetes incidence: The role of socio-economic status. *Health Reports Statistics Canada* 2010;**21**(3)
11. Kumari M, Head J, Marmot M. Prospective Study of Social and Other Risk Factors for Incidence of Type 2 Diabetes in the Whitehall II Study. *Arch Intern Med* 2004;**164**(17):1873-80 doi: 10.1001/archinte.164.17.1873[published Online First: Epub Date].

- 1  
2  
3 12. Maty SC, Everson-Rose SA, Haan MN, Raghunathan TE, Kaplan GA. Education, income,  
4 occupation, and the 34-year incidence (1965–99) of Type 2 diabetes in the Alameda County  
5 Study. *International Journal of Epidemiology* 2005;**34**(6):1274-81 doi:  
6  
7 10.1093/ije/dyi167[published Online First: Epub Date]].  
8  
9  
10  
11 13. Diez-Roux AV, Jacobs DR, Kiefe CI. Neighborhood characteristics and components of the insulin  
12 resistance syndrome in young adults. *DIABETES CARE* 2002;**25**(11):1976-82  
13  
14 14. Auchincloss AH, Diez Roux AV, Brown DG, O'Meara ES, Raghunathan TE. Association of  
15 Insulin Resistance with Distance to Wealthy Areas. *AM J EPIDEMIOL* 2007;**165**(4):389-97  
16  
17 15. Auchincloss AH, Diez Roux AV, Brown DG, Erdmann CA, Bertoni AG. Neighborhood resources  
18 for physical activity and healthy foods and their association with insulin resistance.  
19 *Epidemiology* 2008;**19**(1):146-57 doi: 10.1097/EDE.0b013e31815c480[published Online  
20 First: Epub Date]].  
21  
22  
23 16. Schipf S, Werner A, Tamayo T, et al. Regional differences in the prevalence of known Type 2  
24 diabetes mellitus in 45–74 years old individuals: Results from six population-based studies in  
25 Germany (DIAB-CORE Consortium). *DIABET MED* 2012;**29**(7):88-95  
26  
27 17. Müller G, Kluttig A, Greiser KH, et al. Regional and Neighborhood Disparities in the Risk of Type  
28 2 Diabetes: Results from Five Population-Based Studies in Germany (DIAB-CORE  
29 Consortium). *AM J EPIDEMIOL* 2013; **in press**  
30  
31 18. Maier W, Holle R, Hunger M, et al. The impact of regional deprivation and individual socio-  
32 economic status on the prevalence of Type 2 diabetes in Germany. A pooled analysis of five  
33 population-based studies. *Diabet Medicine* 2013;**30**(3):e78-e86  
34  
35 19. Stafford M, Cummins S, Macintyre S, Ellaway A, Marmot M. Gender differences in the  
36 associations between health and neighbourhood environment. *SOC SCI MED*  
37 2005;**60**(8):1681-92  
38  
39 20. Greiser K, Kluttig A, Schumann B, et al. Cardiovascular disease, risk factors and heart rate  
40 variability in the elderly general population: Design and objectives of the CARdiovascular  
41 disease, Living and Ageing in Halle (CARLA) Study. *BMC CARDIOVASC DISORD*  
42 2005;**5**(1):33  
43  
44  
45  
46  
47  
48  
49  
50  
51  
52  
53  
54  
55  
56  
57  
58  
59  
60

- 1  
2  
3 21. Völzke H, Alte D, Schmidt CO, et al. Cohort Profile: The Study of Health in Pomerania. INT J  
4  
5 EPIDEMIOL 2011;**40**(2):294-307  
6  
7 22. Dragano N, Hoffmann B, Stang A, et al. Subclinical Coronary Atherosclerosis And  
8  
9 Neighbourhood Deprivation in an Urban Region. EUR J EPIDEMIOL 2009;**24**(1):25-35  
10  
11 23. Rathmann W, Haastert B, Icks A, et al. High prevalence of undiagnosed diabetes mellitus in  
12  
13 Southern Germany: Target populations for efficient screening. The KORA survey 2000.  
14  
15 Diabetologia 2003;**46**(2):182-89  
16  
17 24. Vennemann M, Hummel T, Berger K. The association between smoking and smell and taste  
18  
19 impairment in the general population. J NEUROL 2008;**255**(8):1121-26  
20  
21 25. Schunk M, Reitmeir P, Schipf S, et al. Health-related quality of life in subjects with and without  
22  
23 Type 2 diabetes: pooled analysis of five population-based surveys in Germany. DIABET  
24  
25 MED 2012;**29**(5):646-53  
26  
27 26. Breckenkamp J, Mielck A, Razum O. Health inequalities in Germany: do regional-level variables  
28  
29 explain differentials in cardiovascular risk? BMC PUBLIC HEALTH 2007;**7**(1):132  
30  
31 27. Dragano N, Bobak M, Wege N, et al. Neighbourhood socioeconomic status and cardiovascular  
32  
33 risk factors: a multilevel analysis of nine cities in the Czech Republic and Germany. BMC  
34  
35 PUBLIC HEALTH 2007;**7**(1):255  
36  
37 28. Cummins S, Stafford M, Macintyre S, Marmot M, Ellaway A. Neighbourhood environment and its  
38  
39 association with self rated health: evidence from Scotland and England. J EPIDEMIOL  
40  
41 COMMUNITY HEALTH 2005;**59**(3):207-13  
42  
43 29. van Lenthe FJ, Borrell LN, Costa G, et al. Neighbourhood unemployment and all cause mortality:  
44  
45 a comparison of six countries. Journal of Epidemiology and Community Health  
46  
47 2005;**59**(3):231-37 doi: 10.1136/jech.2004.022574[published Online First: Epub Date]].  
48  
49 30. Campbell DA, Radford JM, Burton P. Unemployment rates: an alternative to the Jarman index?  
50  
51 BRIT MED J 1991;**303**(6805):750-55 doi: 10.1136/bmj.303.6805.750[published Online First:  
52  
53 Epub Date]].  
54  
55  
56  
57  
58  
59  
60

- 1  
2  
3 31. Larsen K, Merlo J. Appropriate assessment of neighborhood effects on individual health:  
4  
5 Integrating random and fixed effects in multilevel logistic regression. *AM J EPIDEMIOL*  
6  
7 2005;**161**(1):81-88  
8
- 9 32. Merlo J, Chaix B, Ohlsson H, et al. A brief conceptual tutorial of multilevel analysis in social  
10  
11 epidemiology: using measures of clustering in multilevel logistic regression to investigate  
12  
13 contextual phenomena. *J EPIDEMIOL COMMUNITY HEALTH* 2006;**60**(4):290-97  
14
- 15 33. Sterne JAC, Bradburn MJ, Egger M. Meta-analysis in Stata. In: Egger M, Smith GD, Altman DG,  
16  
17 eds. *Systematic Reviews in Health Care. Meta-analysis in context*. London: BMJ, 1995.  
18
- 19 34. Huedo-Medina T, Sanchez-Meca J, Marin-Martinez F, Botella J. Assessing heterogeneity in meta-  
20  
21 analysis: Q statistic or I<sup>2</sup> index? Center for Health, Intervention, and Prevention Documents  
22  
23 2006;**Paper 19**  
24
- 25 35. Arber S, Gilbert GN, Dale A. Paid employment and women's health: a benefit or a source of role  
26  
27 strain? *SOCIOL HEALTH ILL* 1985;**7**(3):375-400  
28
- 29 36. Repetti RL, Matthews KA, Waldron I. Employment and women's health: Effects of paid  
30  
31 employment on women's mental and physical health. *AM PSYCHOL* 1989;**44**(11):1394-401  
32
- 33 37. Krishnan S, Cozier YC, Rosenberg L, Palmer JR. Socioeconomic Status and Incidence of Type 2  
34  
35 Diabetes: Results From the Black Women's Health Study. *American Journal of Epidemiology*  
36  
37 2010;**171**(5):564-70 doi: 10.1093/aje/kwp443[published Online First: Epub Date].  
38
- 39 38. King T, Kavanagh AM, Jolley D, Turrell G, Crawford D. Weight and place: a multilevel cross-  
40  
41 sectional survey of area-level social disadvantage and overweight//obesity in Australia. *INT J*  
42  
43 *OBES* 2005;**30**(2):281-87  
44
- 45 39. Robert SA, Reither EN. A multilevel analysis of race, community disadvantage, and body mass  
46  
47 index among adults in the US. *SOC SCI MED* 2004;**59**(12):2421-34  
48
- 49 40. MacIntyre S, Hunt K. Socio-economic Position, Gender and Health. *Journal of Health Psychology*  
50  
51 1997;**2**(3):315-34  
52
- 53 41. Okura Y, Urban LH, Mahoney DW, Jacobsen SJ, Rodeheffer RJ. Agreement between self-report  
54  
55 questionnaires and medical record data was substantial for diabetes, hypertension, myocardial  
56  
57 infarction and stroke but not for heart failure. *J CLIN EPIDEMIOL* 2004;**57**(10):1096-103  
58  
59  
60

- 1  
2  
3 42. Jackson JM, DeFor TA, Crain AL, et al. Self-reported diabetes is a valid outcome in pragmatic  
4  
5 clinical trials and observational studies. *Journal of Clinical Epidemiology* 2013;**66**(3):349-50  
6  
7 43. Kawachi I, Berkman LF. Introduction. In: Kawachi I, Berkman LF, eds. *Neighborhoods and*  
8  
9 *Health*. Oxford: Oxford University Press, 2003.  
10  
11 44. Diez Roux AV. Estimating neighborhood health effects: the challenges of causal inference in a  
12  
13 complex world. *SOC SCI MED* 2004;**58**(10):1953-60  
14  
15 45. Sampson RJ. Neighborhood-Level Context and Health: Lessons from Sociology. In: Kawachi I,  
16  
17 Berkman LF, eds. *Neighborhoods and Health*. Oxford: Oxford University Press, 2003.  
18  
19 46. Yen IH, Kaplan GA. Neighborhood social environment and risk of death: Multilevel evidence  
20  
21 from the Alameda County Study. *AM J EPIDEMIOL* 1999;**149**(10):898-907  
22  
23  
24  
25  
26  
27  
28  
29  
30  
31  
32  
33  
34  
35  
36  
37  
38  
39  
40  
41  
42  
43  
44  
45  
46  
47  
48  
49  
50  
51  
52  
53  
54  
55  
56  
57  
58  
59  
60

1  
2  
3  
4  
5  
6  
7  
8  
9  
10  
11  
12  
13  
14  
15  
16  
17  
18  
19  
20  
21  
22  
23  
24  
25  
26  
27  
28  
29  
30  
31  
32  
33  
34  
35  
36  
37  
38  
39  
40  
41  
42  
43  
44  
45  
46  
47  
48  
49  
50  
51  
52  
53  
54  
55  
56  
57  
58  
59  
60



412x333mm (72 x 72 DPI)

For peer review only

STROBE 2007 (v4) Statement—Checklist of items that should be included in reports of *cross-sectional studies*

| Section/Topic                | Item # | Recommendation                                                                                                                                                                       | Reported on page # |
|------------------------------|--------|--------------------------------------------------------------------------------------------------------------------------------------------------------------------------------------|--------------------|
| Title and abstract           | 1      | (a) Indicate the study's design with a commonly used term in the title or the abstract                                                                                               | 2                  |
|                              |        | (b) Provide in the abstract an informative and balanced summary of what was done and what was found                                                                                  | 2                  |
| <b>Introduction</b>          |        |                                                                                                                                                                                      |                    |
| Background/rationale         | 2      | Explain the scientific background and rationale for the investigation being reported                                                                                                 | 5                  |
| Objectives                   | 3      | State specific objectives, including any prespecified hypotheses                                                                                                                     | 5                  |
| <b>Methods</b>               |        |                                                                                                                                                                                      |                    |
| Study design                 | 4      | Present key elements of study design early in the paper                                                                                                                              | 6                  |
| Setting                      | 5      | Describe the setting, locations, and relevant dates, including periods of recruitment, exposure, follow-up, and data collection                                                      | 6                  |
| Participants                 | 6      | (a) Give the eligibility criteria, and the sources and methods of selection of participants                                                                                          | 6                  |
| Variables                    | 7      | Clearly define all outcomes, exposures, predictors, potential confounders, and effect modifiers. Give diagnostic criteria, if applicable                                             | 6-7                |
| Data sources/<br>measurement | 8*     | For each variable of interest, give sources of data and details of methods of assessment (measurement). Describe comparability of assessment methods if there is more than one group | 6-7                |
| Bias                         | 9      | Describe any efforts to address potential sources of bias                                                                                                                            | 8                  |
| Study size                   | 10     | Explain how the study size was arrived at                                                                                                                                            | 6                  |
| Quantitative variables       | 11     | Explain how quantitative variables were handled in the analyses. If applicable, describe which groupings were chosen and why                                                         | 6-7                |
| Statistical methods          | 12     | (a) Describe all statistical methods, including those used to control for confounding                                                                                                | 7-8                |
|                              |        | (b) Describe any methods used to examine subgroups and interactions                                                                                                                  | 7                  |
|                              |        | (c) Explain how missing data were addressed                                                                                                                                          | 6                  |
|                              |        | (d) If applicable, describe analytical methods taking account of sampling strategy                                                                                                   | -                  |
|                              |        | (e) Describe any sensitivity analyses                                                                                                                                                | 8                  |
| <b>Results</b>               |        |                                                                                                                                                                                      |                    |



|                          |     |                                                                                                                                                                                                              |                   |
|--------------------------|-----|--------------------------------------------------------------------------------------------------------------------------------------------------------------------------------------------------------------|-------------------|
| Participants             | 13* | (a) Report numbers of individuals at each stage of study—eg numbers potentially eligible, examined for eligibility, confirmed eligible, included in the study, completing follow-up, and analysed            | 6/8               |
|                          |     | (b) Give reasons for non-participation at each stage                                                                                                                                                         | 6                 |
|                          |     | (c) Consider use of a flow diagram                                                                                                                                                                           | -                 |
| Descriptive data         | 14* | (a) Give characteristics of study participants (eg demographic, clinical, social) and information on exposures and potential confounders                                                                     | 8/15 (table 2)    |
|                          |     | (b) Indicate number of participants with missing data for each variable of interest                                                                                                                          | 6                 |
| Outcome data             | 15* | Report numbers of outcome events or summary measures                                                                                                                                                         | 15                |
| Main results             | 16  | (a) Give unadjusted estimates and, if applicable, confounder-adjusted estimates and their precision (eg, 95% confidence interval). Make clear which confounders were adjusted for and why they were included | 8-10/17 (table 3) |
|                          |     | (b) Report category boundaries when continuous variables were categorized                                                                                                                                    | 6                 |
|                          |     | (c) If relevant, consider translating estimates of relative risk into absolute risk for a meaningful time period                                                                                             | -                 |
| Other analyses           | 17  | Report other analyses done—eg analyses of subgroups and interactions, and sensitivity analyses                                                                                                               | 10                |
| <b>Discussion</b>        |     |                                                                                                                                                                                                              |                   |
| Key results              | 18  | Summarise key results with reference to study objectives                                                                                                                                                     | 11-12             |
| Limitations              | 19  | Discuss limitations of the study, taking into account sources of potential bias or imprecision. Discuss both direction and magnitude of any potential bias                                                   | 13                |
| Interpretation           | 20  | Give a cautious overall interpretation of results considering objectives, limitations, multiplicity of analyses, results from similar studies, and other relevant evidence                                   | 12                |
| Generalisability         | 21  | Discuss the generalisability (external validity) of the study results                                                                                                                                        | 12                |
| <b>Other information</b> |     |                                                                                                                                                                                                              |                   |
| Funding                  | 22  | Give the source of funding and the role of the funders for the present study and, if applicable, for the original study on which the present article is based                                                | 25                |

\*Give information separately for cases and controls in case-control studies and, if applicable, for exposed and unexposed groups in cohort and cross-sectional studies.

**Note:** An Explanation and Elaboration article discusses each checklist item and gives methodological background and published examples of transparent reporting. The STROBE checklist is best used in conjunction with this article (freely available on the Web sites of PLoS Medicine at <http://www.plosmedicine.org/>, Annals of Internal Medicine at <http://www.annals.org/>, and Epidemiology at <http://www.epidem.com/>). Information on the STROBE Initiative is available at [www.strobe-statement.org](http://www.strobe-statement.org).



**Gender Differences in the Association of Individual Social Class and Neighborhood Unemployment Rate With Prevalent Type 2 Diabetes Mellitus: A Cross-sectional Study from The DIAB-CORE Consortium**

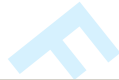

|                                 |                                                                                                                                                                                                                                                                                                                                                                                                                                                                                                                                                                                                                                                                                                                                                                                                                                                                                                                                                                                                                                                                                                                                                                                                                                                                                                                                                                                                                                                                                                                                             |
|---------------------------------|---------------------------------------------------------------------------------------------------------------------------------------------------------------------------------------------------------------------------------------------------------------------------------------------------------------------------------------------------------------------------------------------------------------------------------------------------------------------------------------------------------------------------------------------------------------------------------------------------------------------------------------------------------------------------------------------------------------------------------------------------------------------------------------------------------------------------------------------------------------------------------------------------------------------------------------------------------------------------------------------------------------------------------------------------------------------------------------------------------------------------------------------------------------------------------------------------------------------------------------------------------------------------------------------------------------------------------------------------------------------------------------------------------------------------------------------------------------------------------------------------------------------------------------------|
| Journal:                        | <i>BMJ Open</i>                                                                                                                                                                                                                                                                                                                                                                                                                                                                                                                                                                                                                                                                                                                                                                                                                                                                                                                                                                                                                                                                                                                                                                                                                                                                                                                                                                                                                                                                                                                             |
| Manuscript ID:                  | bmjopen-2013-002601.R2                                                                                                                                                                                                                                                                                                                                                                                                                                                                                                                                                                                                                                                                                                                                                                                                                                                                                                                                                                                                                                                                                                                                                                                                                                                                                                                                                                                                                                                                                                                      |
| Article Type:                   | Research                                                                                                                                                                                                                                                                                                                                                                                                                                                                                                                                                                                                                                                                                                                                                                                                                                                                                                                                                                                                                                                                                                                                                                                                                                                                                                                                                                                                                                                                                                                                    |
| Date Submitted by the Author:   | 08-May-2013                                                                                                                                                                                                                                                                                                                                                                                                                                                                                                                                                                                                                                                                                                                                                                                                                                                                                                                                                                                                                                                                                                                                                                                                                                                                                                                                                                                                                                                                                                                                 |
| Complete List of Authors:       | Müller, Grit; University of Muenster, Institute of Epidemiology and Social Medicine<br>Hartwig, Saskia; Martin-Luther-University Halle-Wittenberg, Institute of Medical Epidemiology, Biostatistics and Informatics<br>Greiser, Karin Halina; Martin-Luther-University Halle-Wittenberg, Institute of Medical Epidemiology, Biostatistics and Informatics; Division of Cancer Epidemiology, German Cancer Research Center<br>Moebus, Susanne; Institute for Medical Informatics, Biometry and Epidemiology, University Hospital of Essen<br>Pundt, Noreen; Institute for Medical Informatics, Biometry and Epidemiology, University Hospital of Essen<br>Schipf, Sabine; Institute for Community Medicine, University Medicine Greifswald<br>Völzke, Henry; Institute for Community Medicine, University Medicine Greifswald<br>Maier, Werner; German Research Center for Environmental Health (GmbH), Institute of Health Economics and Health Care Management, Helmholtz Zentrum München<br>Meisinger, Christa; German Research Center for Environmental Health (GmbH), Institute of Epidemiology II, Helmholtz Zentrum München<br>Tamayo, Teresa; Institute of Biometrics and Epidemiology, German Diabetes Center, Leibniz Center for Diabetes Research at Heinrich-Heine-University<br>Rathmann, Wolfgang; Institute of Biometrics and Epidemiology, German Diabetes Center, Leibniz Center for Diabetes Research at Heinrich-Heine-University<br>Berger, Klaus; University of Muenster, Institute of Epidemiology and Social Medicine |
| <b>Primary Subject Heading</b>: | Epidemiology                                                                                                                                                                                                                                                                                                                                                                                                                                                                                                                                                                                                                                                                                                                                                                                                                                                                                                                                                                                                                                                                                                                                                                                                                                                                                                                                                                                                                                                                                                                                |
| Secondary Subject Heading:      | Diabetes and endocrinology, Epidemiology, Public health                                                                                                                                                                                                                                                                                                                                                                                                                                                                                                                                                                                                                                                                                                                                                                                                                                                                                                                                                                                                                                                                                                                                                                                                                                                                                                                                                                                                                                                                                     |
| Keywords:                       | General diabetes < DIABETES & ENDOCRINOLOGY, EPIDEMIOLOGY, PUBLIC HEALTH                                                                                                                                                                                                                                                                                                                                                                                                                                                                                                                                                                                                                                                                                                                                                                                                                                                                                                                                                                                                                                                                                                                                                                                                                                                                                                                                                                                                                                                                    |
|                                 |                                                                                                                                                                                                                                                                                                                                                                                                                                                                                                                                                                                                                                                                                                                                                                                                                                                                                                                                                                                                                                                                                                                                                                                                                                                                                                                                                                                                                                                                                                                                             |

1  
2  
3  
4  
5  
6  
7  
8  
9  
10  
11  
12  
13  
14  
15  
16  
17  
18  
19  
20  
21  
22  
23  
24  
25  
26  
27  
28  
29  
30  
31  
32  
33  
34  
35  
36  
37  
38  
39  
40  
41  
42  
43  
44  
45  
46  
47  
48  
49  
50  
51  
52  
53  
54  
55  
56  
57  
58  
59  
60

SCHOLARONE™  
Manuscripts

For peer review only

1  
2  
3 **Gender Differences in the Association of Individual Social Class and Neighborhood**  
4 **Unemployment Rate With Prevalent Type 2 Diabetes Mellitus: A Cross-sectional Study from**  
5 **The DIAB-CORE Consortium**  
6  
7

8  
9 **Short title: Gender Differences in the Association of Socio-Economic Factors With Diabetes**  
10

11  
12 Grit Müller<sup>1</sup>, Saskia Hartwig<sup>2</sup>, Karin Halina Greiser<sup>2,3</sup>, Susanne Moebus<sup>4</sup>, Noreen Pundt<sup>4</sup>, Sabine  
13 Schipf<sup>5</sup>, Henry Völzke<sup>5</sup>, Werner Maier<sup>6</sup>, Christa Meisinger<sup>7</sup>, Teresa Tamayo<sup>8</sup>, Wolfgang Rathmann<sup>8</sup>,  
14 Klaus Berger<sup>1</sup>, for the DIAB-CORE Consortium  
15  
16

17  
18  
19 <sup>1</sup> Institute of Epidemiology and Social Medicine, University of Muenster, Germany

20 <sup>2</sup> Institute of Medical Epidemiology, Biostatistics and Informatics, Martin-Luther-University Halle-  
21 Wittenberg, Halle (Saale), Germany  
22

23 <sup>3</sup> Division of Cancer Epidemiology, German Cancer Research Center (DKFZ), Heidelberg, Germany

24 <sup>4</sup> Institute for Medical Informatics, Biometry and Epidemiology, University Hospital of Essen,  
25 University Duisburg-Essen, Essen, Germany

26 <sup>5</sup> Institute for Community Medicine, University Medicine Greifswald, Greifswald, Germany

27 <sup>6</sup> Helmholtz Zentrum München, German Research Center for Environmental Health (GmbH), Institute  
28 of Health Economics and Health Care Management, Neuherberg, Germany  
29

30 <sup>7</sup> Helmholtz Zentrum München, German Research Center for Environmental Health (GmbH), Institute  
31 of Epidemiology II, Neuherberg, Germany

32 <sup>8</sup> Institute of Biometrics and Epidemiology, German Diabetes Center, Leibniz Center for Diabetes  
33 Research at Heinrich-Heine-University, Düsseldorf, Germany  
34

35  
36 Corresponding author:

37 Address: Grit Müller  
38 Institute of Epidemiology and Social Medicine  
39 University of Muenster  
40 Domagkstraße 3  
41 48149 Muenster  
42 Germany

43  
44 Email: muellegr@uni-muenster.de

45 Fon: 0049-251-83-55649

46 Fax: 0049-251-83-55300  
47  
48  
49  
50

51 **Keywords:** Type 2 Diabetes mellitus, Gender, Multilevel Analysis, Residence Characteristics,  
52 Socioeconomic Factors, Population-based  
53

54 Word count: 3710  
55  
56  
57  
58  
59  
60

1  
2  
3 **Abstract** (word count: 253; max. 300)  
4  
5  
6

7 **Objective:** To analyze gender differences in the relationship of individual social class, employment  
8 status and neighborhood unemployment rate with present type 2 diabetes mellitus (T2DM).  
9

10  
11 **Design:** Five cross-sectional studies.  
12

13 **Setting:** Studies were conducted in five regions of Germany from 1997-2006.  
14

15 **Participants:** The sample consisted of 8,871 individuals residing in 226 neighborhoods in five urban  
16 regions.  
17

18  
19 **Primary and secondary outcome measures:** Prevalent T2DM.  
20

21 **Results:** We found significant multiplicative interactions between gender and the individual variables  
22 social class and employment status. Social class was statistically significant associated with T2DM in  
23 men and women, whereby this association was stronger in women (lower versus higher social class:  
24 odds ratio (OR) 2.68 (95% confidence intervals (CI): 1.66-4.34)) than men (lower versus higher social  
25 class: OR 1.78 (95% CI: 1.22-2.58)). Significant associations of employment status and T2DM were  
26 only found in women (unemployed versus employed: OR 1.73 (95% CI: 1.02-2.92); retired versus  
27 employed: OR 1.77 (95% CI: 1.10-2.84); others versus employed: OR 1.64 (95% CI: 1.01-2.67)).  
28 Neighborhood unemployment rate was associated with T2DM in men (high versus low tertile: OR  
29 1.52 (95% CI: 1.18-1.96)). Between-study and between-neighborhood variation in the T2DM  
30 prevalence was more pronounced in women. The considered covariates helped to explain statistically  
31 the variation in the T2DM prevalence among men, but not among women.  
32  
33  
34  
35  
36  
37  
38  
39  
40  
41  
42

43 **Conclusions:** Social class was inversely associated with T2DM in both men and women, whereby the  
44 association was more pronounced in women. Employment status only affected T2DM in women.  
45  
46  
47  
48  
49  
50  
51  
52  
53  
54  
55  
56  
57  
58  
59  
60  
Neighborhood unemployment rate is an important predictor of T2DM in men, but not in women.

## Article Summary

### Article focus

- The aim of this study was to examine disparities in the association of individual social class, employment status and neighborhood unemployment rate with prevalent T2DM by gender in a pooled analysis of five population-based regional studies.

### Key messages

- Social class was statistically significantly associated with T2DM among women and men, however, the association was stronger in women than men; particularly the individual employment status is an important determinant of T2DM in women.
- Between-study and between-neighborhood variance in T2DM was more pronounced in women, as already observed for obesity.
- Neighborhood unemployment rate was only associated with T2DM in men after the adjustment for individual variables.

### Strength and limitations of this study

- Data of five population-based representative studies were applied linking data on the prevalence of T2DM to small areas and regions.
- This study adds knowledge to the research on the interaction of gender, social determinants and health on different levels.
- Limitations were as follows: The cross-sectional design does not allow causal conclusions; T2DM was based on a self-reported physician's diagnosis; Administrative definitions of neighborhoods could result in exposure misclassification and underestimation of neighborhood effects; Problem of residential selection.

**List of Abbreviations**

|           |                                                                |
|-----------|----------------------------------------------------------------|
| CARLA     | Cardiovascular Disease, Living and Ageing in Halle Study       |
| CI        | Confidence Interval                                            |
| DHS       | Dortmund Health Study                                          |
| DIAB-CORE | Diabetes Collaborative Research of Epidemiologic Studies       |
| HNR       | Heinz Nixdorf Recall Study                                     |
| KORA S4   | Cooperative Health Research in the Region of Augsburg Survey 4 |
| MOR       | Median Odds Ratio                                              |
| OR        | Odds Ratio                                                     |
| SD        | Standard Deviation                                             |
| SE        | Standard Error                                                 |
| SHIP      | Study of Health in Pomerania                                   |
| T2DM      | Type 2 Diabetes Mellitus                                       |
| $V_A$     | Area-Level Variance                                            |

## Introduction

Gender differences in health inequality vary by the studied health outcome, the measure of social status and the stage of life course [1-3]. A systematic review of 23 case-control and cohort studies on socio-economic differences in the incidence of type 2 diabetes mellitus (T2DM) concluded that inequality in the risk of T2DM was stronger in women than men [4]. However, the results are diverse in respect to the magnitude in the association of T2DM and social status in men: A number of studies showed associations among both men and women [5-8], but there have been also studies published reporting associations only in women [9 10]. In respect to occupational status, contrasting results have been presented by Kumari et al. [11] and Maty et al. [12]. For instance, the first study showed a stronger inverse relationship between the civil service employment grade and the incidence of T2DM in men, applying data of the Whitehall study II [11].

Beyond an individual's social class, socio-economic characteristics of the neighborhood affect health [13-15]. As part of the Diabetes Collaborative Research of Epidemiologic Studies (DIAB-CORE) in Germany, Schipf et al. reported regional disparities in the age-standardized prevalence of T2DM [16]. In two recent studies, we found that the prevalence of T2DM varied across regions in Germany, even after adjustment for individual characteristics. These variations could in part be explained statistically by neighborhood unemployment rate within cities or by regional deprivation [17 18].

Gender differences may arise out of different exposures to social, psychosocial and behavioral determinants of health ("differential exposure hypothesis"). Another explanation might be a different vulnerability to health determinants, characteristics of the neighborhood and reaction to material, behavioral and psychosocial conditions of men and women ("differential vulnerability hypothesis") [2 19]. Differences in men's and women's perception of the neighborhood context and social status may be as well a source of health disparities. Stafford et al. examined gender differences in the relationship between self-rated health and the neighborhood context and found a larger impact of the neighborhood context on the health of women [19].

The aim of this study was (1) to investigate if the association of individual social class, individual employment status and neighborhood unemployment rate with prevalent T2DM differs for men and women in a pooled analysis of five population-based regional studies; and (2) to examine the extent to



1  
2  
3 which the prevalence of T2DM varies by gender between neighborhoods and regions in Germany. In a  
4 sub-analysis, we performed study-specific calculations of the relationship between T2DM and social  
5 class in men and women.  
6  
7  
8  
9

## 10 **Methods**

11  
12 Within the DIAB-CORE, cross-sectional data of five regional studies were pooled: the Cardiovascular  
13 Disease, Living and Ageing in Halle Study (CARLA), the Dortmund Health Study (DHS), the Heinz  
14 Nixdorf Recall Study (HNR), the Cooperative Health Research in the Region of Augsburg (KORA)  
15 S4 Study, and the Study of Health in Pomerania (SHIP). Data collection was conducted between 1997  
16 and 2006. The studies have similar study designs (population-based), sampling procedures (two-stage  
17 cluster or stratified random sampling) and response proportions (56%-69%). The studies were  
18 approved by local ethics committees and informed written consent was obtained from the study  
19 participants. Within the five studies, similar instruments, questionnaires and medical measurements  
20 were applied to collect data. Study designs have been described elsewhere in more detail [20-24].  
21  
22

23  
24 In brief, data on 11,688 subjects aged 45-74 years were provided. 2,280 individuals living in rural  
25 areas of KORA and SHIP were excluded from the sample, because these subjects could not be  
26 assigned to spatial units below the level of municipalities; so, that our study was limited to urban  
27 areas. Study participants were assigned to neighborhoods via addresses of residence at baseline (8  
28 subjects could not be linked). The neighborhoods were defined by administrative units: statistical  
29 administrative units (subdivision of city districts) in HNR and DHS, city districts in CARLA, planning  
30 regions (summary of city districts) in KORA and postal code areas in SHIP. Participants resided in  
31 227 neighborhoods of the total 236 neighborhoods in the five study regions. After further exclusion of  
32 participants with missing information on individual characteristics (n=529), the final sample consisted  
33 of 8,871 residents in 226 neighborhoods.  
34  
35  
36  
37  
38  
39  
40  
41  
42  
43  
44  
45  
46  
47  
48  
49  
50

51  
52 Based on the definition of the DIAB-CORE Consortium [25], a T2DM case was defined as self-  
53 reported physician-diagnosed T2DM or self-reported T2DM treatment (insulin, oral anti-diabetic  
54 agents, dietary treatment). Subjects reporting an age at diagnosis of 30 years or younger were excluded  
55 from the analyses to avoid inclusion of possible cases of type 1 diabetes.  
56  
57  
58  
59  
60

1  
2  
3 Social class was measured with a summary score of income and education. Its' operationalization  
4 was derived from the Winkler-Index of Socioeconomic Status [26], which summarizes information on  
5 individual educational and professional attainment, net household income and the occupational  
6 position of the main earner of a household. The three dimensions are transformed to an ordinal scale  
7 ranging from 1 to 7 and summed up to an index with a scale from 3 to 21 points. Since the information  
8 on occupational status was not available for our analysis, the index was solely based on education and  
9 income, ranging between 2 and 14 points. The index was divided into three groups: higher social class,  
10 middle social class and lower social class. Study participants were classified in four employment  
11 status groups: employed, retired and unemployed individuals as well as persons with other forms of  
12 employment, including participants in vocational retraining, housewives and housemen.

13  
14  
15  
16  
17  
18  
19  
20  
21  
22  
23 Neighborhood unemployment rate was applied as a proxy for the socio-economic status of the  
24 neighborhoods and calculated as the number of unemployed residents in relation to the working-age  
25 population (aged 15-64), obtained from the statistical offices of each considered city. The median year  
26 of the data collection period of each study was used as the reference year. A number of studies applied  
27 unemployment rate as a measure of deprivation and it was proven to be a strong predictor of health  
28 outcomes [22 27-29]. Campbell et al. highlighted that unemployment rate is a simple and good  
29 indicator for social and material deprivation, which is regularly updated and easily accessible [30]. For  
30 our analysis, equally-sized tertiles of study-specific neighborhood unemployment rate were used to  
31 detect a potential dose-response relationship. Hereafter, the authors refer to low, medium and high  
32 levels of unemployment rate in relative terms which corresponds, however, to considerably different  
33 levels of unemployment rate across study regions.

34  
35  
36  
37  
38  
39  
40  
41  
42  
43  
44  
45  
46  
47  
48  
49  
50  
51  
52  
53  
54  
55  
56  
57  
58  
59  
60  
The variable marital status summarized information whether a study participant lived with or without a  
partner. Moreover, life style variables including smoking status (current smoker; former smoker; never  
smoker), physical exercise (exercise; no exercise), body mass index (BMI) ( $<30$  kg/m<sup>2</sup>;  $\geq 30$  kg/m<sup>2</sup>)  
and alcohol consumption (no or moderate intake: women:  $\leq 20$  grams per day; men:  $\leq 40$  grams per  
day; high intake: women:  $>20$  grams per day; men:  $>40$  grams per day) were considered. Physical  
exercise was measured as hours spent per week on all kinds of exercise training excluding low level  
exercise like walking. Due to homogenization procedure, physical exercise was operationalized as any

1  
2  
3 exercise irrespective of frequency and duration. All variables were constructed following DIAB-  
4 CORE standard procedures for the homogenization of basic variables to ensure a high degree of  
5 comparability.  
6  
7

### 11 **Statistical Analysis**

12 Descriptive analysis included the calculation of crude and age-adjusted prevalence of T2DM (derived  
13 from a logistic regression) and corresponding 95% confidence intervals (CI) by gender for individual  
14 variables and neighborhood unemployment rate.  
15  
16

17 Our data set had a hierarchical structure including individuals (level 1), nested within neighborhoods  
18 (level 2), which were nested in study regions (level 3). To account for this data structure in our  
19 statistical analysis, multi-level modeling methods were applied. We conducted a series of mixed  
20 effects logistic regression models. First, we tested for interactions between gender and individual  
21 social class, employment status and neighborhood unemployment rate. To do so, we estimated  
22 regression models including terms for gender and social class, employment status or neighborhood  
23 unemployment rate as main effects and an interaction term for the effect of social class, employment  
24 status or neighborhood unemployment rate by gender. Second, gender-stratified analyses were  
25 conducted with a stepwise modeling strategy. The models were adjusted for the confounding variables  
26 age, marital status and the remaining social variables (social class/ employment status/ neighborhood  
27 unemployment rate) depending on the variable of interest. Life style factors, including smoking,  
28 alcohol consumption, BMI and physical activity were evaluated as potential mediators in the  
29 relationship between T2DM and individual social class, employment status or neighborhood  
30 unemployment rate. The results were presented as odds ratios (OR) with corresponding 95% CI.  
31  
32

33 Random effects were included to capture between-study and between-neighborhood variance reported  
34 as median odds ratios (MOR). The latter represents a transformation of the area-level variation ( $V_A$ ) on  
35 an OR-scale. The MOR gives the median value of all ORs between a randomly chosen highest- and  
36 lowest-risk-area and was calculated on the level of neighborhoods and study regions with the  
37 following equation:  $MOR = \exp(\sqrt{(2 * V_A)} * 0.6745)$ , where 0.6745 is the 75<sup>th</sup> centile of the  
38 cumulative distribution function of the normal distribution with mean zero and variance one [31 32].  
39  
40  
41  
42  
43  
44  
45  
46  
47  
48  
49  
50  
51  
52  
53  
54  
55  
56  
57  
58  
59  
60

1  
2  
3 Study-specific analyses were performed and analyzed with meta-analytical tools. Due to the small  
4 number of cases by study, the social class variable had to be applied as a continuous measure in this  
5 sub-analysis (ranging between two points, highest social class, and 14 points, lowest social class). For  
6 this purpose, inverse-variance weighting was used to estimate fixed and random effects summary  
7 estimates and displayed in forest plots [33]. Q-statistic and  $I^2$  index were applied to assess  
8 heterogeneity and the extent of heterogeneity between study results respectively [34]. Analyses were  
9 performed in STATA/ SE 11.0.  
10  
11  
12  
13  
14  
15  
16  
17  
18

## 19 Results

20  
21 In total, 8,871 subjects residing in 226 neighborhoods in five urban regions were included in our  
22 analysis. Characteristics of the five studies are displayed in table 1. The crude T2DM prevalence was  
23 statistically significantly lower among women than men, 7.5% (95% CI 6.7-8.3) versus 10.0% (95%  
24 CI 9.1-10.9) (significance derived from 95% CI). This pattern was observed in all five regional  
25 studies. Socio-demographic characteristics are reported in table 2. Compared to men, women belonged  
26 more often to the lower or middle social class and a higher proportion was not employed, except in  
27 SHIP. A higher proportion of women than men reported to live without a partner.  
28  
29  
30  
31  
32  
33  
34

35 The age-adjusted prevalence of T2DM was statistically significantly lower in higher social class  
36 women and men than in the lower social class (4.7% (95% CI: 3.9-5.7) respectively 9.7% (95% CI:  
37 8.3-11.5) in women; 6.9% (95% CI: 5.9-8.1) respectively 14.2% (95% CI: 11.8-16.8) in men) (table  
38 3). Women had a statistically significantly lower age-adjusted T2DM prevalence than men over all  
39 social classes. Employed men had a statistically significantly lower age-adjusted T2DM prevalence  
40 with 7.3% (95% CI: 6.2-8.7) than retired men with 10.2% (95% CI: 8.8-11.7). Across neighborhoods,  
41 the highest age-adjusted prevalence of T2DM was found in women and men living in neighborhoods  
42 with a high unemployment rate (8.3% (95% CI: 7.2-9.5), respectively 10.9% (95% CI: 9.6-12.3)).  
43  
44  
45  
46  
47  
48  
49  
50  
51  
52  
53  
54  
55  
56  
57  
58  
59  
60  
Individuals living without a partner showed statistically significantly higher prevalence than  
individuals who lived with a partner irrespective of gender. Being physical inactive or having a BMI  
of 30 or above was statistically significantly associated with a higher T2DM prevalence in men and  
women.

1  
2  
3 In the fully adjusted multivariable analyses, the interaction terms of social class and gender were  
4 statistically significant. Among the employment status, we found significant multiplicative interactions  
5 between unemployed individuals and gender as well as between retired individuals and gender. The  
6 interaction terms between neighborhood unemployment rate and gender were not statistically  
7 significant.  
8

9  
10  
11 The results of the gender-stratified multivariable regression analysis are presented in table 4. Among  
12 women and men, we found a statistically significant association of social class and T2DM. The social  
13 gradient in the odds of T2DM was reduced when the models were adjusted for age and the  
14 confounding variables. This reduction was particularly large in women. Overall, the association  
15 between social class and T2DM was stronger in women (lower versus higher social class: OR 2.68  
16 (95% CI: 1.66-4.34)) than men (lower versus higher social class: OR 1.77 (95% CI: 1.22-2.58))  
17 (model 3, table 4). Significant associations of employment status and T2DM were only found in  
18 women: In reference to employed women, retired women, unemployed women and women with other  
19 employment status had a 1.73, (95% CI: 1.02-2.92), a 1.77 (95% CI: 1.10-2.84) respectively a 1.64  
20 (95% CI: 1.01-2.67) higher odds to have T2DM (model 3, table 4). The significant elevated odds of  
21 T2DM in retired men were dissolved by adjustment for age.  
22  
23  
24  
25  
26  
27  
28  
29  
30  
31  
32  
33  
34

35 Women residing in neighborhoods with a medium level of unemployment showed significant elevated  
36 odds to have T2DM (OR 1.45 (95% CI: 1.03-2.04)) (model 2), which was dissolved when the model  
37 was adjusted by confounding variables. In contrast, men residing in neighborhoods with a high level  
38 of unemployment showed a 52% (95% CI: 1.18-1.96) higher odds to have T2DM than men in low  
39 unemployment neighborhoods in the confounder-adjusted model 3. T2DM was no longer associated  
40 with marital status after adjustment by confounding variables in model 3 (living without versus living  
41 with a partner: OR 1.17 (95% CI: 0.90-1.51) in women, OR 1.20 (95% CI: 0.89-1.61) in men).  
42  
43  
44  
45  
46  
47  
48

49 As part of mediation analysis, the association of life style variables and social class, employment  
50 status and neighborhood unemployment rate as well as the association between type 2 diabetes and life  
51 style variables were tested. Type 2 diabetes was related to BMI and physical activity in men and  
52 women, but smoking only in men and alcohol consumption not in both (not taken into further  
53 consideration). BMI, physical activity and smoking were tested to be statistically significantly  
54  
55  
56  
57  
58  
59  
60

1  
2  
3 associated with social class, employment status and neighborhood unemployment rate with some  
4 exceptions: In women, physical exercise was not associated with employment status and smoking not  
5 related at all with social variables. Thereupon, the life style variables were introduced into model 4  
6 and the estimates of social class, employment status and neighborhood unemployment rate evaluated  
7 in respect to reductions in the association with T2DM. In men and women, we observed reductions in  
8 the effects of individual social class, employment status and neighborhood unemployment rate when  
9 introducing these life style factors in the analysis. Especially, the association between social class and  
10 T2DM was strongly reduced in women and men. This reduction was mainly driven by BMI in women  
11 (solely adjusted by BMI, higher versus lower social class OR 1.73 (95% CI: 1.05-2.85)) and physical  
12 exercise in men (solely adjusted by physical exercise, higher versus lower social class OR 1.59 (95%  
13 CI: 1.09-2.32)), providing evidence that these life style variables partly mediated the relationship  
14 between social class and type 2 diabetes.

15  
16  
17  
18  
19  
20  
21  
22  
23  
24  
25  
26  
27 Between-study and between-neighborhood variation in the prevalence of T2DM was larger in women  
28 than men. The prevalence of T2DM in men varied only between study regions (unadjusted model:  
29 MOR: 1.20;  $V_A$ : 0.04; SE: 0.03) (online supplemental material, table 5), which was fully explained  
30 statistically by age, social class, employment status, neighborhood unemployment rate, marital status  
31 and life style factors. The T2DM prevalence in women showed large variation across neighborhoods  
32 (unadjusted model: MOR: 1.47;  $V_A$ : 0.16; SE: 0.10) and study regions (unadjusted model: MOR: 1.31;  
33  $V_A$ : 0.07; SE: 0.06), which was not dissolved by the considered explanatory variables (between-  
34 neighborhood variation: MOR: 1.32;  $V_A$ : 0.08; SE: 0.09, between-study variation: MOR: 1.29;  $V_A$ :  
35 0.07; SE: 0.06) (model 5, table 5).

36  
37  
38  
39  
40  
41  
42  
43  
44  
45  
46  
47  
48  
49  
50  
51  
52  
53  
54  
55  
56  
57  
58  
59  
60  
Regarding gender differences in health inequalities across regions, the effect estimates of the five  
studies were tested to be homogenous (figure 1). A low social class was associated with higher odds of  
T2DM, adjusted for age, employment status, marital status and neighborhood unemployment rate. In  
women, an increase of one point on the social class score (decrease in social class) was associated with  
an increase of 13% (pooled OR: 1.13 (95% CI: 1.06-1.21);  $I^2=14.0\%$ ;  $p=0.325$ ) in the odds of having  
T2DM. This association was smaller in men (pooled OR: 1.06 (95% CI: 1.00-1.11);  $I^2=0.0\%$ ;

1  
2  
3 p=0.456), although the differences between genders were not significant. This was observed in all  
4  
5 studies, except CARLA.  
6  
7  
8  
9

## 10 11 **Discussion**

12  
13 This study assessed gender differences in the association of individual social class, employment status  
14  
15 and neighborhood unemployment rate with prevalent T2DM, using data from five regional population-  
16  
17 based studies in Germany. Women and men belonging to the lower social class had a higher  
18  
19 prevalence of T2DM. We found that the gradient in the prevalence of T2DM across social classes was  
20  
21 clearly stronger in women than men. This pattern was consistent across all regions but CARLA and  
22  
23 mainly in line with results of prior studies presenting only associations in women [7-9], or in men and  
24  
25 women but more pronounced in women [5 6].  
26

27  
28 In our study, the individual employment status was only associated with T2DM in women. Being  
29  
30 unemployed, retired or a housewife yielded higher odds of T2DM. However, since we were not able to  
31  
32 consider occupational position in our analyses, the interpretation of these findings is limited. In the  
33  
34 literature, two contrasting theories are discussed for the effects of paid employment on women's  
35  
36 health. Employment can have a health promoting function due to role accumulation in contrast to the  
37  
38 monotony, isolation, low social status and self-esteem of housewives. A health damaging effect could  
39  
40 arise due to role strains, e.g. stress due to multiple roles, and heavy job demands [35 36].

41  
42 Men residing in neighborhoods with a high level of unemployment rate were more likely to have  
43  
44 T2DM than men in better-off neighborhoods. These effects remained even after adjustment for  
45  
46 confounding and mediator variables, whereas associations between neighborhood unemployment rate  
47  
48 and T2DM in women were dissolved by the introduction of confounding variables. These deviating  
49  
50 effects of neighborhood unemployment rate between men and women may be explained by the fact  
51  
52 that men were more often engaged in employment and, hence, depend more on the regional labor  
53  
54 market and its employment opportunities than women. Potential underlying mechanisms in the  
55  
56 relationship between neighborhood unemployment rate and T2DM include neighborhood resources  
57  
58 such as the availability of grocery stores offering healthy food and recreational facilities [15], the  
59  
60

1  
2  
3 adoption and maintenance of risky health behavior and psychosocial factors such as chronic stress [13  
4  
5 37].

6  
7 Between-study and between-neighborhood variation in the prevalence of T2DM was larger in women  
8  
9 than men. We found that individual social class, employment status and neighborhood unemployment  
10  
11 rate played an important role in explaining statistically regional differences in the prevalence of T2DM  
12  
13 in men. A large fraction of the detected variation in the prevalence of T2DM on the level of  
14  
15 neighborhoods and regions remained statistically unexplained in women, suggesting that there were  
16  
17 characteristics on the individual, neighborhood and regional level that determine the presence of  
18  
19 T2DM and which were not considered in our analysis. Previous work on regional variation in self-  
20  
21 rated health and BMI also found larger regional variation in women [19 38 39].

22  
23 The gender-specific pattern in the association between social class and the prevalence of T2DM need  
24  
25 to be further explored, since the pathways are still unknown [6]. Macintyre et al. noted that socio-  
26  
27 economic determinants vary in their meaning for men and women, since both genders are socialized in  
28  
29 different ways with diverging social roles and coping strategies against stress; they hold different  
30  
31 occupational positions in the labor market and have dissimilar access to material and psycho-social  
32  
33 resources [40]. In our study, overall women were less likely to be in the higher social class and were  
34  
35 less often employed.

36  
37 To gain more insight in mechanisms of social inequalities on health, the analysis of population  
38  
39 subgroups is essential, since one limitation of the existing literature is the assumption that mechanisms  
40  
41 operate identically in different population groups [19]. This work adds knowledge to the research on  
42  
43 the interaction of gender, social determinants and health. So far, only few studies examined this  
44  
45 interaction with regard to T2DM and to our knowledge no study considered neighborhood  
46  
47 unemployment rate in regard to that, so far. Data sources providing representative population-based  
48  
49 data on the prevalence of T2DM with a linkage to small areas and regions are still rare.

50  
51 Some limitations of this work should be acknowledged. We analyzed cross-sectional data with limited  
52  
53 causal conclusions. We could not use occupation as an indicator of social class in our analysis since  
54  
55 the assessment was not comparable between studies. The prevalence of T2DM was based on a self-  
56  
57 reported T2DM physician's diagnosis only, which could not be validated. Therefore, undetected type 2  
58  
59



1  
2  
3 diabetes could be a source of bias. However, Okura et al. found a high accuracy between self-reports  
4 and medical records for diabetes and other chronic diseases [41]. Recently, Jackson et al. concluded  
5 that self-reported diabetes is a valid outcome for observational studies from an accuracy of 91.8% of  
6 self-reported prevalent diabetes validated by medical records based on the Women's Health Initiative  
7 [42]. Another potential limitation is the selection by response (response proportions: 56%-69%),  
8 which might have affected our results. The exclusion of participants from the initial sample due to  
9 missing information on individual characteristics (mainly due to missing information on net household  
10 income) could have led to an underestimation of the social gradient in T2DM, because these subjects  
11 were on average older, more often female, out of employment and with a lower educational status.  
12 However, a sensitivity analysis showed similar results applying education as measure of social class.  
13 We used administrative definitions for neighborhoods. Hence, neighborhoods in our study may not  
14 capture the immediate neighborhood of residence of our study participants. This could lead to  
15 exposure misclassification and underestimation of neighborhood effects [43]. The applied  
16 administrative definition of neighborhoods differed between studies and neighborhoods were diverse  
17 according to their area and population size. Another challenge in the research of neighborhood impact  
18 on health is the residential selection. Individuals may be selected into neighborhoods due to individual  
19 characteristics, such as residents of poor areas cannot afford moving to better-off neighborhoods [44  
20 45]. Finally, we had no information on the residential history of the study participants, which could  
21 result in an underestimation of neighborhood effects on health [46].  
22  
23  
24  
25  
26  
27  
28  
29  
30  
31  
32  
33  
34  
35  
36  
37  
38  
39  
40  
41  
42

43 In conclusion, our study identified different relationships of individual social class, employment status  
44 and neighborhood unemployment rate with the prevalence of T2DM for women and men. In both men  
45 and women, the prevalence of T2DM was inversely related to social class. This social gradient was  
46 stronger in women. Regional variance in the T2DM prevalence was larger in women than men.  
47 Whereas the major proportion of the variance in the T2DM prevalence remained statistically  
48 unexplained in women, the regional variance in men was low and completely explained by the  
49 considered variables.  
50  
51  
52  
53  
54  
55  
56  
57  
58  
59  
60

Table 1: Characteristics of the 5 Population-Based Studies (CARLA, DHS, KORA, HNR, and SHIP, Germany, 1997-2006)<sup>a</sup>

|                                                              | CARLA                      | DHS                                  | KORA                       | HNR                                   | SHIP                                   |
|--------------------------------------------------------------|----------------------------|--------------------------------------|----------------------------|---------------------------------------|----------------------------------------|
| <b>Study period</b>                                          | 12/2002-01/2006            | 09/2003-06/2004                      | 10/1999-04/2001            | 12/2000-06/2003                       | 10/1997-03/2001                        |
| <b>Federal state (Region)</b>                                | Saxony-Anhalt (east)       | North Rhine-Westphalia (west)        | Bavaria (south)            | North Rhine-Westphalia (west)         | Mecklenburg-West Pomerania (northeast) |
| <b>Sampling</b>                                              | stratified random sampling | stratified random sampling           | two-stage cluster sampling | stratified random sampling            | two-stage cluster sampling             |
| <b>Cities</b>                                                | Halle (Saale)              | Dortmund                             | Augsburg                   | Bochum, Essen, Mülheim                | Greifswald, Stralsund                  |
| <b>Neighborhoods (n)/ Types</b>                              | 43/ city districts         | 62/ statistical administrative units | 17/ planning regions       | 108/ statistical administrative units | 6/ clusters of city districts          |
| <b>Total population (neighborhood range)</b>                 | 238,078 (18 - 19,210)      | 587,607 (476 - 25,686)               | 252,725 (2,730 - 37,246)   | 1,142,112 (262 - 32,466)              | 115,962 (5,230 - 31,154)               |
| <b>Unemployment rate (%; neighborhood range)<sup>b</sup></b> | 14.1 (3.9 - 22.5)          | 15.3 (5.0 - 27.7)                    | 4.8 (1.9 - 7.6)            | 7.5 (1.7 - 13.5)                      | 13.1 (9.9 - 14.9)                      |

<sup>a</sup> the Cardiovascular Disease, Living and Ageing in Halle Study (CARLA), the Dortmund Health Study (DHS), the Heinz Nixdorf Recall Study (HNR), the Cooperative Health Research in the Region of Augsburg (KORA) S4 Study, and the Study of Health in Pomerania (SHIP)

<sup>b</sup> Data on neighborhood unemployment were collected in the year 1999 in SHIP, in 2000 in KORA, in the years 2001 in HNR and in 2003 in CARLA and DHS

**Table 2: Participants Characteristics in the 5 Population-Based Studies (CARLA, DHS, KORA, HNR, SHIP, Germany, 1997-2006)<sup>a</sup>**

| Study                                                           | CARLA            |                 | DHS             |                | KORA          |               | HNR            |               | SHIP            |                |
|-----------------------------------------------------------------|------------------|-----------------|-----------------|----------------|---------------|---------------|----------------|---------------|-----------------|----------------|
|                                                                 | men              | women           | men             | women          | men           | women         | men            | women         | men             | women          |
| <b>Participants 45-74 with full information</b>                 | 719              | 638             | 414             | 411            | 533           | 494           | 2,257          | 2,175         | 615             | 615            |
| <b>Number of neighborhoods (range of residing participants)</b> | 37 (3-139)       |                 | 60 (1-42)       |                | 17 (13-141)   |               | 106 (1-140)    |               | 6 (95-396)      |                |
| <b>Crude diabetes prevalence (%) (95% CI)</b>                   | 12.9 (10.6-15.6) | 12.1 (9.6-14.9) | 11.8 (8.9-15.3) | 7.8 (5.4-10.8) | 7.1 (5.1-9.7) | 5.5 (3.6-7.9) | 8.9 (7.8-10.2) | 5.9 (5.0-7.0) | 11.7 (9.3-14.5) | 9.6 (7.4-12.2) |
| <b>Mean age (SD)</b>                                            | 61.0 (8.0)       | 60.4 (7.7)      | 60.9 (8.4)      | 59.7 (8.5)     | 58.9 (8.6)    | 58.8 (8.4)    | 59.5 (7.8)     | 59.4 (7.8)    | 60.3 (8.3)      | 58.8 (8.3)     |
| <b>Social class % (n)</b>                                       |                  |                 |                 |                |               |               |                |               |                 |                |
| lower                                                           | 7.4 (53)         | 13.0 (83)       | 11.1 (46)       | 23.8 (98)      | 6.0 (32)      | 16.4 (81)     | 6.2 (140)      | 19.7 (429)    | 12.2 (75)       | 26.0 (160)     |
| middle                                                          | 61.3 (441)       | 65.1 (415)      | 46.1 (191)      | 46.2 (190)     | 48.4 (258)    | 54.1 (267)    | 53.0 (1195)    | 55.9 (1215)   | 67.3 (414)      | 63.1 (388)     |
| higher                                                          | 31.3 (225)       | 21.9 (140)      | 42.8 (177)      | 29.9 (123)     | 45.6 (243)    | 29.6 (146)    | 40.9 (922)     | 24.4 (531)    | 20.5 (126)      | 10.9 (67)      |
| <b>Employment status % (n)</b>                                  |                  |                 |                 |                |               |               |                |               |                 |                |
| employed                                                        | 34.9 (251)       | 30.6 (195)      | 38.7 (160)      | 34.8 (143)     | 50.3 (268)    | 35.0 (173)    | 46.4 (1047)    | 31.9 (693)    | 33.3 (205)      | 35.1 (216)     |
| retired                                                         | 48.1 (346)       | 52.0 (332)      | 51.9 (215)      | 33.8 (139)     | 43.0 (229)    | 39.3 (194)    | 47.6 (1075)    | 37.4 (813)    | 54.0 (332)      | 49.6 (305)     |
| unemployed                                                      | 15.2 (109)       | 12.4 (79)       | 7.3 (30)        | 6.1 (25)       | 6.4 (34)      | 8.9 (44)      | 5.7 (129)      | 7.5 (162)     | 12.4 (76)       | 14.5 (89)      |
| others                                                          | 1.8 (13)         | 5.0 (32)        | 2.2 (9)         | 25.3 (104)     | 0.4 (2)       | 16.8 (83)     | 0.3 (6)        | 23.3 (507)    | 0.3 (2)         | 0.8 (5)        |
| <b>Marital status (%)</b>                                       |                  |                 |                 |                |               |               |                |               |                 |                |
| living with a partner                                           | 89.0 (640)       | 73.4 (468)      | 86.7 (359)      | 71.5 (294)     | 82.4 (439)    | 67.2 (332)    | 90.2 (2035)    | 74.7 (1624)   | 88.3 (543)      | 68.8 (423)     |
| living without a partner                                        | 11.0 (79)        | 26.7 (170)      | 13.3 (55)       | 28.5 (117)     | 17.6 (94)     | 32.8 (162)    | 9.8 (222)      | 25.3 (551)    | 11.7 (72)       | 31.2 (192)     |

<sup>a</sup> the Cardiovascular Disease, Living and Ageing in Halle Study (CARLA), the Dortmund Health Study (DHS), the Heinz Nixdorf Recall Study (HNR), the Cooperative Health Research in the Region of Augsburg (KORA) S4 Study, and the Study of Health in Pomerania (SHIP)

**Table 3: Gender-Stratified Crude and Age-Adjusted Prevalence of Type 2 Diabetes Mellitus by Individual Variables and Neighborhood Unemployment Rate with Data From Five Population-Based Studies (CARLA, DHS, KORA, HNR, SHIP, Germany, 1997-2006) <sup>a, b</sup>**

|                          | Men  |                  |      |           |                         |           | Women |                  |      |           |                         |          |
|--------------------------|------|------------------|------|-----------|-------------------------|-----------|-------|------------------|------|-----------|-------------------------|----------|
|                          | No.  | Crude Prevalence |      |           | Age-adjusted Prevalence |           | No.   | Crude Prevalence |      |           | Age-adjusted Prevalence |          |
|                          |      | T2D Cases        | %    | 95% CI    | %                       | 95% CI    |       | T2D Cases        | %    | 95% CI    | %                       | 95% CI   |
| <b>Social class</b>      |      |                  |      |           |                         |           |       |                  |      |           |                         |          |
| lower                    | 346  | 57               | 16.5 | 12.7-20.8 | 14.2                    | 11.8-16.8 | 851   | 104              | 12.2 | 10.1-14.6 | 9.7                     | 8.3-11.5 |
| middle                   | 2499 | 267              | 10.7 | 9.5-12.0  | 9.7                     | 8.7-10.8  | 2475  | 194              | 7.8  | 6.8-9.0   | 6.6                     | 5.8-7.5  |
| higher                   | 1693 | 129              | 7.6  | 6.4-9.0   | 6.9                     | 5.9-8.1   | 1007  | 26               | 2.6  | 1.7-3.8   | 4.7                     | 3.8-5.6  |
| <b>Employment status</b> |      |                  |      |           |                         |           |       |                  |      |           |                         |          |
| employed                 | 1931 | 126              | 6.5  | 5.5-7.7   | 7.3                     | 6.2-8.7   | 1420  | 39               | 2.8  | 2.0-3.7   | 5.5                     | 4.6-6.7  |
| retired                  | 2197 | 290              | 13.2 | 11.8-14.7 | 10.2                    | 8.8-11.7  | 1783  | 213              | 11.9 | 10.5-13.5 | 7.8                     | 6.6-9.1  |
| unemployed               | 378  | 32               | 8.5  | 5.9-11.7  | 10.3                    | 8.0-13.2  | 399   | 26               | 6.5  | 4.3-9.4   | 7.8                     | 6.0-10.2 |
| others                   | 32   | 5                | 15.6 | 5.3-32.8  | 8.7                     | 6.4-11.6  | 731   | 46               | 6.3  | 4.6-8.3   | 6.6                     | 5.0-8.6  |
| <b>Marital status</b>    |      |                  |      |           |                         |           |       |                  |      |           |                         |          |
| Living with a partner    | 4016 | 387              | 9.6  | 8.7-10.6  | 8.7                     | 7.9-9.5   | 3141  | 199              | 6.3  | 5.5-7.2   | 6.2                     | 5.4-7.0  |
| Living without a partner | 522  | 66               | 12.6 | 9.9-15.8  | 11.5                    | 9.7-13.6  | 1192  | 125              | 10.5 | 8.8-12.4  | 8.3                     | 7.1-9.7  |
| <b>Physical exercise</b> |      |                  |      |           |                         |           |       |                  |      |           |                         |          |
| physical exercise        | 2474 | 194              | 7.8  | 6.8-9.0   | 7.5                     | 6.6-8.4   | 2266  | 136              | 6.0  | 5.1-7.1   | 5.5                     | 4.8-6.3  |
| no physical exercise     | 2013 | 258              | 12.8 | 11.4-14.4 | 10.9                    | 9.8-12.2  | 1990  | 178              | 8.9  | 7.7-10.3  | 8.1                     | 7.2-9.2  |
| <b>Smoking</b>           |      |                  |      |           |                         |           |       |                  |      |           |                         |          |
| never smoked             | 1370 | 113              | 8.2  | 6.8-9.8   | 8.4                     | 7.2-9.7   | 2502  | 208              | 8.3  | 7.3-9.5   | 6.5                     | 5.7-7.4  |
| ex-smoker                | 2067 | 241              | 11.7 | 10.3-13.1 | 9.5                     | 8.5-10.8  | 936   | 72               | 7.7  | 6.1-9.6   | 7.5                     | 6.3-8.8  |
| current smoker           | 1050 | 98               | 9.3  | 7.6-11.3  | 8.7                     | 7.3-10.3  | 815   | 34               | 4.2  | 2.9-5.8   | 6.8                     | 5.6-8.2  |
| <b>BMI</b>               |      |                  |      |           |                         |           |       |                  |      |           |                         |          |
| < 30                     | 3220 | 260              | 8.1  | 7.2-9.1   | 6.6                     | 5.8-7.4   | 2996  | 123              | 4.1  | 3.4-4.9   | 4.7                     | 4.1-5.4  |

1  
2  
3  
4  
5  
6  
7  
8  
9  
10  
11  
12  
13  
14  
15  
16  
17  
18  
19  
20  
21  
22  
23  
24  
25  
26  
27  
28  
29  
30  
31  
32  
33  
34  
35  
36  
37  
38  
39  
40  
41  
42  
43  
44  
45  
46  
47  
48  
49

|                            |      |     |      |           |      |           |      |     |      |           |      |           |
|----------------------------|------|-----|------|-----------|------|-----------|------|-----|------|-----------|------|-----------|
| ≥ 30                       | 1267 | 192 | 15.2 | 13.2-17.2 | 15.4 | 13.8-17.3 | 1260 | 191 | 15.2 | 13.2-17.3 | 11.4 | 10.0-12.9 |
| <b>Alcohol consumption</b> |      |     |      |           |      |           |      |     |      |           |      |           |
| no or moderate intake      | 3974 | 414 | 10.4 | 9.5-11.4  | 9.2  | 8.4-10.2  | 4018 | 303 | 7.5  | 6.7-8.4   | 6.8  | 6.1-7.6   |
| high intake                | 513  | 38  | 7.4  | 5.3-10.0  | 7.4  | 5.6-9.6   | 238  | 11  | 4.6  | 2.3-8.1   | 5.4  | 4.0-7.3   |
| <b>Unemployment rate</b>   |      |     |      |           |      |           |      |     |      |           |      |           |
| low                        | 1519 | 125 | 8.2  | 6.9-9.7   | 7.4  | 6.4-8.6   | 1384 | 85  | 6.1  | 4.9-7.5   | 5.6  | 4.8-6.6   |
| medium                     | 1579 | 144 | 9.1  | 7.7-10.6  | 8.7  | 7.6-9.9   | 1527 | 120 | 7.9  | 6.6-9.3   | 6.6  | 5.7-7.6   |
| high                       | 1440 | 184 | 12.8 | 11.1-14.6 | 10.9 | 9.6-12.3  | 1422 | 119 | 8.4  | 7.0-9.9   | 8.3  | 7.2-9.5   |

<sup>a</sup> the Cardiovascular Disease, Living and Ageing in Halle Study (CARLA), the Dortmund Health Study (DHS), the Heinz Nixdorf Recall Study (HNR), the Cooperative Health Research in the Region of Augsburg (KORA) S4 Study, and the Study of Health in Pomerania (SHIP)

<sup>b</sup> Age-adjusted prevalence are derived from logistic regression models

**Table 4: Gender-Stratified Multi-Level Logistic Regression of Type 2 Diabetes Mellitus by Individual Social Class, Employment Status and Neighborhood Unemployment Rate<sup>a, b, c</sup>**

|                               |       | Social class<br>(Reference: higher social class) |                  | Employment status<br>(Reference: employed) |                  |                  | Unemployment rate<br>(Reference: low unemployment rate) |                  |
|-------------------------------|-------|--------------------------------------------------|------------------|--------------------------------------------|------------------|------------------|---------------------------------------------------------|------------------|
|                               |       | middle                                           | lower            | retired                                    | unemployed       | others           | medium                                                  | high             |
|                               |       | OR (95% CI)                                      | OR (95% CI)      | OR (95% CI)                                | OR (95% CI)      | OR (95% CI)      | OR (95% CI)                                             | OR (95% CI)      |
| <b>Model 1<sup>d</sup></b>    | Women | 3.11 (2.04-4.73)                                 | 5.37 (3.44-8.40) | 4.71 (3.31-6.69)                           | 2.36 (1.41-3.95) | 2.65 (1.69-4.14) | 1.45 (1.03-2.04)                                        | 1.26 (0.89-1.79) |
|                               | Men   | 1.42 (1.14-1.77)                                 | 2.31 (1.65-3.24) | 2.14 (1.71-2.66)                           | 1.24 (0.82-1.87) | 2.38 (0.89-6.33) | 1.15 (0.89-1.49)                                        | 1.58 (1.24-2.02) |
| <b>Model 2<sup>e</sup></b>    | Women | 2.25 (1.46-3.45)                                 | 3.16 (1.99-5.03) | 2.01 (1.26-3.21)                           | 2.07 (1.23-3.48) | 1.77 (1.10-2.85) | 1.45 (1.03-2.04)                                        | 1.25 (0.88-1.78) |
|                               | Men   | 1.21 (0.96-1.51)                                 | 2.03 (1.44-2.86) | 1.25 (0.90-1.73)                           | 1.17 (0.78-1.76) | 1.98 (0.74-5.29) | 1.12 (0.87-1.45)                                        | 1.62 (1.27-2.07) |
| <b>Model 3<sup>f</sup></b>    | Women | 2.02 (1.31-3.13)                                 | 2.68 (1.66-4.34) | 1.77 (1.10-2.84)                           | 1.73 (1.02-2.92) | 1.64 (1.01-2.67) | 1.36 (0.96-1.93)                                        | 1.13 (0.79-1.62) |
|                               | Men   | 1.13 (0.89-1.43)                                 | 1.78 (1.22-2.58) | 1.09 (0.77-1.52)                           | 0.94 (0.61-1.44) | 2.00 (0.74-5.39) | 1.08 (0.83-1.40)                                        | 1.52 (1.18-1.96) |
| <b>Model 4<sup>g, h</sup></b> | Women | 1.52 (0.98-2.37)                                 | 1.66 (1.01-2.75) | 1.66 (1.02-2.69)                           | 1.67 (0.97-2.88) | 1.69 (1.02-2.78) | 1.20 (0.85-1.69)                                        | 1.02 (0.72-1.46) |
|                               | Men   | 1.03 (0.81-1.31)                                 | 1.48 (1.00-2.18) | 1.01 (0.72-1.42)                           | 0.91 (0.59-1.40) | 1.69 (0.62-4.61) | 1.06 (0.82-1.38)                                        | 1.46 (1.13-1.87) |

<sup>a</sup> Odds Ratios and 95% Confidence Intervals derived from Three-Level Mixed Effects Logistic Regression Models

<sup>b</sup> Data From Five Population-Based Studies: the Cardiovascular Disease, Living and Ageing in Halle Study (CARLA), the Dortmund Health Study (DHS), the Heinz Nixdorf Recall Study (HNR), the Cooperative Health Research in the Region of Augsburg (KORA) S4 Study, and the Study of Health in Pomerania (SHIP), Germany, 1997-2006

<sup>c</sup> men: n=4,538, women: n=4,333

<sup>d</sup> Model 1: unadjusted

<sup>e</sup> Model 2: adjusted by age

<sup>f</sup> Model 3: adjusted by age, social class, employment status, neighborhood unemployment rate, marital status

<sup>g</sup> Model 4: adjusted by age, social class, employment status, neighborhood unemployment rate, marital status, BMI, physical exercise, smoking (only for men)

<sup>h</sup> Sample size n=8,732 due to 139 missing values on life style factors

1  
2  
3  
4  
5  
6  
7  
8  
9  
10  
11 <sup>a</sup> Odds Ratios and 95% Confidence Intervals derived from Study-Stratified Two-Level Mixed Effects

12 Logistic Regression Models

13  
14 <sup>b</sup> Adjusted for Age, Employment Status, Marital Status and Neighborhood Unemployment Rate

15  
16  
17 <sup>c</sup> Data From Five Population-Based Studies: the Cardiovascular Disease, Living and Ageing in Halle  
18 Study (CARLA), the Dortmund Health Study (DHS), the Heinz Nixdorf Recall Study (HNR), the  
19 Cooperative Health Research in the Region of Augsburg (KORA) S4 Study, and the Study of Health  
20 in Pomerania (SHIP), Germany, 1997-2006

21  
22  
23 <sup>d</sup> Heterogeneity tested via Q-statistic and I<sup>2</sup>-index  
24  
25  
26  
27  
28  
29  
30  
31  
32  
33  
34  
35  
36  
37  
38  
39  
40  
41  
42  
43  
44  
45  
46  
47  
48  
49  
50  
51  
52  
53  
54  
55  
56  
57  
58  
59  
60

1  
2  
3 **Declaration of Competing Interests**  
4

5 Nothing to declare.  
6  
7  
8  
9  
10  
11  
12  
13  
14  
15  
16  
17  
18  
19  
20  
21  
22  
23  
24  
25  
26  
27  
28  
29  
30  
31  
32  
33  
34  
35  
36  
37  
38  
39  
40  
41  
42  
43  
44  
45  
46  
47  
48  
49  
50  
51  
52  
53  
54  
55  
56  
57  
58  
59  
60

For peer review only



1  
2  
3  
4  
5  
6  
7  
8  
9  
10  
11  
12  
13  
14  
15  
16  
17  
18  
19  
20  
21  
22  
23  
24  
25  
26  
27  
28  
29  
30  
31  
32  
33  
34  
35  
36  
37  
38  
39  
40  
41  
42  
43  
44  
45  
46  
47  
48  
49  
50  
51  
52  
53  
54  
55  
56  
57  
58  
59  
60

**Data sharing statement**

No additional data available.

For peer review only

1  
2  
3 **Patient consent**  
4

5 Obtained.  
6  
7  
8  
9  
10  
11  
12  
13  
14  
15  
16  
17  
18  
19  
20  
21  
22  
23  
24  
25  
26  
27  
28  
29  
30  
31  
32  
33  
34  
35  
36  
37  
38  
39  
40  
41  
42  
43  
44  
45  
46  
47  
48  
49  
50  
51  
52  
53  
54  
55  
56  
57  
58  
59  
60

For peer review only

**Contribution**

The authors G.M., K.B. (DHS), S.H., K.H.G. (CARLA), S.M., N.P. (HNR), S.S., H.V. (SHIP), W.M., and C.M. (KORA) researched data. G.M. developed the study conception, performed the statistical analyses and drafted the manuscript. K.B. contributed to the study conception, statistical analyses and data interpretation. W.R. and T.T. contributed to the pooling of data. All authors critically reviewed the manuscript and contributed to the interpretation of the results.

For peer review only

### Funding statement

This work was supported by the Competence Network Diabetes mellitus of the German Federal Ministry of Education and Research (BMBF, grant 01GI0814).

The Study of Health in Pomerania (SHIP) is part of the Community Medicine Research net (<http://www.community-medicine.de>) at the University of Greifswald, Germany. Funding was provided by grants from the German Federal Ministry of Education and Research (BMBF, grant 01ZZ0403); the Ministry for Education, Research, and Cultural Affairs; and the Ministry for Social Affairs of the Federal State of Mecklenburg–West Pomerania.

The Cardiovascular Disease, Living and Ageing in Halle Study (CARLA) was supported by a grant from the Deutsche Forschungsgemeinschaft as part of the Collaborative Research Center 598 “Heart failure in the elderly - cellular mechanisms and therapy” at the Medical Faculty of the Martin-Luther-University Halle-Wittenberg, by a grant of the Wilhelm-Roux Programme of the Martin-Luther-University Halle-Wittenberg; by the Ministry of Education and Cultural Affairs of Saxony-Anhalt, and by the Federal Employment Office.

The collection of socio-demographic and clinical data in the Dortmund Health Study (DHS) was supported by the German Migraine & Headache Society (DMKG) and by unrestricted grants of equal share from Astra Zeneca, Berlin Chemie, Boots Healthcare, Glaxo-Smith-Kline, McNeil Pharma (former Woelm Pharma), MSD Sharp & Dohme and Pfizer to the University of Muenster.

We thank the Heinz Nixdorf Foundation (Germany) for the generous support of the Heinz Nixdorf Recall Study (HNR). The study is also supported by the German Ministry of Education and Science. We acknowledge the support of the Sarstedt AG & Co. concerning laboratory equipment. We thank the investigative group and the study staff of the Heinz Nixdorf Recall Study.

The KORA research platform (KORA, Cooperative Health Research in the Region of Augsburg) was initiated and financed by the Helmholtz Zentrum München - German Research Center for Environmental Health, which is funded by the German Federal Ministry of Education and Research and by the State of Bavaria. The KORA Diabetes Study was partly funded by a German Research Foundation project grant to W.R. from the German Diabetes Center.

1  
2  
3  
4  
5  
6  
7  
8  
9  
10  
11  
12  
13  
14  
15  
16  
17  
18  
19  
20  
21  
22  
23  
24  
25  
26  
27  
28  
29  
30  
31  
32  
33  
34  
35  
36  
37  
38  
39  
40  
41  
42  
43  
44  
45  
46  
47  
48  
49  
50  
51  
52  
53  
54  
55  
56  
57  
58  
59  
60

The German Diabetes Center is funded by the German Federal Ministry of Health, and the Ministry of School, Science and Research of the State of North-Rhine-Westphalia.

Figure legend:

**Figure 1: Meta Analysis of Five Logistic Regressions of Type 2 Diabetes Mellitus for the Social Class Score (Range: 2-14 Points) in Women and Men <sup>a, b, c, d</sup>**

For peer review only

**Reference list**

1. Thurston RC, Kubzansky LD, Kawachi I, et al. Is the Association between Socioeconomic Position and Coronary Heart Disease Stronger in Women than in Men? *AM J EPIDEMIOL* 2005;**162**(1):57-65
2. Denton M, Prus S, Walters V. Gender differences in health: a Canadian study of the psychosocial, structural and behavioural determinants of health. *SOC SCI MED* 2004;**58**(12):2585-600
3. MacIntyre S, Hunt K. Socio-economic Position, Gender and Health: How Do They Interact? *J HEALTH PSYCHOL* 1997;**2**(3):315-34
4. Agardh E, Allebeck P, Hallqvist J, et al. Type 2 diabetes incidence and socio-economic position: a systematic review and meta-analysis. *International Journal of Epidemiology* 2011;**40**(3):804-18
5. Tanaka T, Gjonca E, Gulliford MC. Income, wealth and risk of diabetes among older adults: cohort study using the English longitudinal study of ageing. *EUR J PUBLIC HEALTH* 2011
6. Robbins J, Vaccarino V, Zhang H, et al. Socioeconomic status and type 2 diabetes in African American and non-Hispanic white women and men: evidence from the Third National Health and Nutrition Examination Survey. *AM J PUBLIC HEALTH* 2001;**91**(1):76-83
7. Tang M, Chen Y, Krewski D. Gender-related differences in the association between socioeconomic status and self-reported diabetes. *INT J EPIDEMIOL* 2003;**32**(3):381-85
8. Ross NA, Gilmour H, Dasgupta K. 14-year diabetes incidence: The role of socio-economic status. *Health Reports Statistics Canada* 2010;**21**(3)
9. Imkampe AK, Gulliford MC. Increasing socio-economic inequality in type 2 diabetes prevalence—Repeated cross-sectional surveys in England 1994–2006. *EUR J PUBLIC HEALTH* 2011;**21**(4):484-90
10. Smith BT, Lynch JW, Fox CS, et al. Life-Course Socioeconomic Position and Type 2 Diabetes Mellitus. *AM J EPIDEMIOL* 2011;**173**(4):438-47
11. Kumari M, Head J, Marmot M. Prospective Study of Social and Other Risk Factors for Incidence of Type 2 Diabetes in the Whitehall II Study. *Arch Intern Med* 2004;**164**(17):1873-80 doi: 10.1001/archinte.164.17.1873[published Online First: Epub Date].

- 1  
2  
3 12. Maty SC, Everson-Rose SA, Haan MN, et al. Education, income, occupation, and the 34-year  
4 incidence (1965–99) of Type 2 diabetes in the Alameda County Study. *International Journal of*  
5 *Epidemiology* 2005;**34**(6):1274-81 doi: 10.1093/ije/dyi167[published Online First: Epub  
6 Date]].  
7  
8  
9  
10  
11 13. Diez-Roux AV, Jacobs DR, Kiefe CI. Neighborhood characteristics and components of the insulin  
12 resistance syndrome in young adults. *DIABETES CARE* 2002;**25**(11):1976-82  
13  
14 14. Auchincloss AH, Diez Roux AV, Brown DG, et al. Association of Insulin Resistance with  
15 Distance to Wealthy Areas. *AM J EPIDEMIOLOG* 2007;**165**(4):389-97  
16  
17 15. Auchincloss AH, Diez Roux AV, Brown DG, et al. Neighborhood resources for physical activity  
18 and healthy foods and their association with insulin resistance. *Epidemiology* 2008;**19**(1):146-  
19 57 doi: 10.1097/EDE.0b013e31815c480[published Online First: Epub Date]].  
20  
21 16. Schipf S, Werner A, Tamayo T, et al. Regional differences in the prevalence of known Type 2  
22 diabetes mellitus in 45–74 years old individuals: Results from six population-based studies in  
23 Germany (DIAB-CORE Consortium). *DIABET MED* 2012;**29**(7):88-95  
24  
25 17. Müller G, Kluttig A, Greiser KH, et al. Regional and Neighborhood Disparities in the Odds of  
26 Type 2 Diabetes: Results from Five Population-Based Studies in Germany (DIAB-CORE  
27 Consortium). *AM J EPIDEMIOLOG* 2013; **in press**  
28  
29 18. Maier W, Holle R, Hunger M, et al. The impact of regional deprivation and individual socio-  
30 economic status on the prevalence of Type 2 diabetes in Germany. A pooled analysis of five  
31 population-based studies. *Diabet Medicine* 2013;**30**(3):e78-e86  
32  
33 19. Stafford M, Cummins S, Macintyre S, et al. Gender differences in the associations between health  
34 and neighbourhood environment. *SOC SCI MED* 2005;**60**(8):1681-92  
35  
36 20. Greiser K, Kluttig A, Schumann B, et al. Cardiovascular disease, risk factors and heart rate  
37 variability in the elderly general population: Design and objectives of the CARdiovascular  
38 disease, Living and Ageing in Halle (CARLA) Study. *BMC CARDIOVASC DISORD*  
39 2005;**5**(1):33  
40  
41 21. Völzke H, Alte D, Schmidt CO, et al. Cohort Profile: The Study of Health in Pomerania. *INT J*  
42 *EPIDEMIOLOG* 2011;**40**(2):294-307  
43  
44  
45  
46  
47  
48  
49  
50  
51  
52  
53  
54  
55  
56  
57  
58  
59  
60

- 1  
2  
3 22. Dragano N, Hoffmann B, Stang A, et al. Subclinical Coronary Atherosclerosis And  
4  
5 Neighbourhood Deprivation in an Urban Region. EUR J EPIDEMIOL 2009;**24**(1):25-35  
6  
7 23. Rathmann W, Haastert B, Icks A, et al. High prevalence of undiagnosed diabetes mellitus in  
8  
9 Southern Germany: Target populations for efficient screening. The KORA survey 2000.  
10  
11 Diabetologia 2003;**46**(2):182-89  
12  
13 24. Vennemann M, Hummel T, Berger K. The association between smoking and smell and taste  
14  
15 impairment in the general population. J NEUROL 2008;**255**(8):1121-26  
16  
17 25. Schunk M, Reitmeir P, Schipf S, et al. Health-related quality of life in subjects with and without  
18  
19 Type 2 diabetes: pooled analysis of five population-based surveys in Germany. DIABET  
20  
21 MED 2012;**29**(5):646-53  
22  
23 26. Breckenkamp J, Mielck A, Razum O. Health inequalities in Germany: do regional-level variables  
24  
25 explain differentials in cardiovascular risk? BMC PUBLIC HEALTH 2007;**7**(1):132  
26  
27 27. Dragano N, Bobak M, Wege N, et al. Neighbourhood socioeconomic status and cardiovascular  
28  
29 risk factors: a multilevel analysis of nine cities in the Czech Republic and Germany. BMC  
30  
31 PUBLIC HEALTH 2007;**7**(1):255  
32  
33 28. Cummins S, Stafford M, Macintyre S, Marmot M, et al. Neighbourhood environment and its  
34  
35 association with self rated health: evidence from Scotland and England. J EPIDEMIOL  
36  
37 COMMUNITY HEALTH 2005;**59**(3):207-13  
38  
39 29. van Lenthe FJ, Borrell LN, Costa G, et al. Neighbourhood unemployment and all cause mortality:  
40  
41 a comparison of six countries. Journal of Epidemiology and Community Health  
42  
43 2005;**59**(3):231-37 doi: 10.1136/jech.2004.022574[published Online First: Epub Date]].  
44  
45 30. Campbell DA, Radford JM, Burton P. Unemployment rates: an alternative to the Jarman index?  
46  
47 BRIT MED J 1991;**303**(6805):750-55 doi: 10.1136/bmj.303.6805.750[published Online First:  
48  
49 Epub Date]].  
50  
51 31. Larsen K, Merlo J. Appropriate assessment of neighborhood effects on individual health:  
52  
53 Integrating random and fixed effects in multilevel logistic regression. AM J EPIDEMIOL  
54  
55 2005;**161**(1):81-88  
56  
57  
58  
59  
60



- 1  
2  
3 32. Merlo J, Chaix B, Ohlsson H, et al. A brief conceptual tutorial of multilevel analysis in social  
4 epidemiology: using measures of clustering in multilevel logistic regression to investigate  
5 contextual phenomena. *J EPIDEMIOL COMMUNITY HEALTH* 2006;**60**(4):290-97  
6  
7  
8  
9 33. Sterne JAC, Bradburn MJ, Egger M. Meta-analysis in Stata. In: Egger M, Smith GD, Altman DG,  
10 eds. *Systematic Reviews in Health Care. Meta-analysis in context*. London: BMJ, 1995.  
11  
12  
13 34. Huedo-Medina T, Sanchez-Meca J, Marin-Martinez F, et al. Assessing heterogeneity in meta-  
14 analysis: Q statistic or I2 index? *Center for Health, Intervention, and Prevention Documents*  
15 **2006;Paper 19**  
16  
17  
18  
19 35. Arber S, Gilbert GN, Dale A. Paid employment and women's health: a benefit or a source of role  
20 strain? *SOCIOL HEALTH ILL* 1985;**7**(3):375-400  
21  
22  
23 36. Repetti RL, Matthews KA, Waldron I. Employment and women's health: Effects of paid  
24 employment on women's mental and physical health. *AM PSYCHOL* 1989;**44**(11):1394-401  
25  
26  
27 37. Krishnan S, Cozier YC, Rosenberg L, et al. Socioeconomic Status and Incidence of Type 2  
28 Diabetes: Results From the Black Women's Health Study. *American Journal of Epidemiology*  
29 2010;**171**(5):564-70 doi: 10.1093/aje/kwp443[published Online First: Epub Date].  
30  
31  
32 38. King T, Kavanagh AM, Jolley D, et al. Weight and place: a multilevel cross-sectional survey of  
33 area-level social disadvantage and overweight//obesity in Australia. *INT J OBES*  
34 2005;**30**(2):281-87  
35  
36  
37 39. Robert SA, Reither EN. A multilevel analysis of race, community disadvantage, and body mass  
38 index among adults in the US. *SOC SCI MED* 2004;**59**(12):2421-34  
39  
40  
41 40. MacIntyre S, Hunt K. Socio-economic Position, Gender and Health. *Journal of Health Psychology*  
42 1997;**2**(3):315-34  
43  
44  
45 41. Okura Y, Urban LH, Mahoney DW, et al. Agreement between self-report questionnaires and  
46 medical record data was substantial for diabetes, hypertension, myocardial infarction and  
47 stroke but not for heart failure. *J CLIN EPIDEMIOL* 2004;**57**(10):1096-103  
48  
49  
50 42. Jackson JM, DeFor TA, Crain AL, et al. Self-reported diabetes is a valid outcome in pragmatic  
51 clinical trials and observational studies. *Journal of Clinical Epidemiology* 2013;**66**(3):349-50  
52  
53  
54  
55  
56  
57  
58  
59  
60

- 1  
2  
3 43. Kawachi I, Berkman LF. Introduction. In: Kawachi I, Berkman LF, eds. Neighborhoods and  
4  
5 Health. Oxford: Oxford University Press, 2003.  
6  
7 44. Diez Roux AV. Estimating neighborhood health effects: the challenges of causal inference in a  
8  
9 complex world. SOC SCI MED 2004;**58**(10):1953-60  
10  
11 45. Sampson RJ. Neighborhood-Level Context and Health: Lessons from Sociology. In: Kawachi I,  
12  
13 Berkman LF, eds. Neighborhoods and Health. Oxford: Oxford University Press, 2003.  
14  
15 46. Yen IH, Kaplan GA. Neighborhood social environment and risk of death: Multilevel evidence  
16  
17 from the Alameda County Study. AM J EPIDEMIOL 1999;**149**(10):898-907  
18  
19  
20  
21  
22  
23  
24  
25  
26  
27  
28  
29  
30  
31  
32  
33  
34  
35  
36  
37  
38  
39  
40  
41  
42  
43  
44  
45  
46  
47  
48  
49  
50  
51  
52  
53  
54  
55  
56  
57  
58  
59  
60

1  
2  
3 **Gender Differences in the Association of Individual Social Class and Neighborhood**  
4 **Unemployment Rate With Prevalent Type 2 Diabetes Mellitus: A Cross-sectional Study from**  
5 **The DIAB-CORE Consortium**  
6  
7

8  
9 **Short title: Gender Differences in the Association of Socio-Economic Factors With Diabetes**  
10

11  
12 Grit Müller<sup>1</sup>, Saskia Hartwig<sup>2</sup>, Karin Halina Greiser<sup>2,3</sup>, Susanne Moebus<sup>4</sup>, Noreen Pundt<sup>4</sup>, Sabine  
13 Schipf<sup>5</sup>, Henry Völzke<sup>5</sup>, Werner Maier<sup>6</sup>, Christa Meisinger<sup>7</sup>, Teresa Tamayo<sup>8</sup>, Wolfgang Rathmann<sup>8</sup>,  
14 Klaus Berger<sup>1</sup>, for the DIAB-CORE Consortium  
15  
16

17  
18  
19 <sup>1</sup> Institute of Epidemiology and Social Medicine, University of Muenster, Germany

20 <sup>2</sup> Institute of Medical Epidemiology, Biostatistics and Informatics, Martin-Luther-University Halle-  
21 Wittenberg, Halle (Saale), Germany  
22

23 <sup>3</sup> Division of Cancer Epidemiology, German Cancer Research Center (DKFZ), Heidelberg, Germany

24 <sup>4</sup> Institute for Medical Informatics, Biometry and Epidemiology, University Hospital of Essen,  
25 University Duisburg-Essen, Essen, Germany

26 <sup>5</sup> Institute for Community Medicine, University Medicine Greifswald, Greifswald, Germany

27 <sup>6</sup> Helmholtz Zentrum München, German Research Center for Environmental Health (GmbH), Institute  
28 of Health Economics and Health Care Management, Neuherberg, Germany

29 <sup>7</sup> Helmholtz Zentrum München, German Research Center for Environmental Health (GmbH), Institute  
30 of Epidemiology II, Neuherberg, Germany

31 <sup>8</sup> Institute of Biometrics and Epidemiology, German Diabetes Center, Leibniz Center for Diabetes  
32 Research at Heinrich-Heine-University, Düsseldorf, Germany  
33  
34

35  
36 Corresponding author:

37 Address: Grit Müller  
38 Institute of Epidemiology and Social Medicine  
39 University of Muenster  
40 Domagkstraße 3  
41 48149 Muenster  
42 Germany

43 Email: muellegr@uni-muenster.de

44 Fon: 0049-251-83-55649

45 Fax: 0049-251-83-55300  
46  
47  
48  
49  
50

51 **Keywords:** Type 2 Diabetes mellitus, Gender, Multilevel Analysis, Residence Characteristics,  
52 Socioeconomic Factors, Population-based  
53

54 **Word count:** 3710  
55  
56  
57  
58  
59  
60

1  
2  
3 **Abstract** (word count: 253; max. 300)  
4  
5  
6

7 **Objective:** To analyze gender differences in the relationship of individual social class, employment  
8 status and neighborhood unemployment rate with present type 2 diabetes mellitus (T2DM).  
9

10 **Design:** Five cross-sectional studies.  
11

12 **Setting:** Studies were conducted in five regions of Germany from 1997-2006.  
13

14 **Participants:** The sample consisted of 8,871 individuals residing in 226 neighborhoods in five urban  
15 regions.  
16  
17

18 **Primary and secondary outcome measures:** Prevalent T2DM.  
19

20 **Results:** We found significant multiplicative interactions between gender and the individual variables  
21 social class and employment status. Social class was statistically significant associated with T2DM in  
22 men and women, whereby this association was stronger in women (lower versus higher social class:  
23 odds ratio (OR) 2.68 (95% confidence intervals (CI): 1.66-4.34)) than men (lower versus higher social  
24 class: OR 1.78 (95% CI: 1.22-2.58)). Significant associations of employment status and T2DM were  
25 only found in women (unemployed versus employed: OR 1.73 (95% CI: 1.02-2.92); retired versus  
26 employed: OR 1.77 (95% CI: 1.10-2.84); others versus employed: OR 1.64 (95% CI: 1.01-2.67)).  
27 Neighborhood unemployment rate was associated with T2DM in men (high versus low tertile: OR  
28 1.52 (95% CI: 1.18-1.96)). Between-study and between-neighborhood variation in the T2DM  
29 prevalence was more pronounced in women. The considered covariates helped to explain statistically  
30 the variation in the T2DM prevalence among men, but not among women.  
31  
32  
33  
34  
35  
36  
37  
38  
39  
40  
41  
42

43 **Conclusions:** Social class was inversely associated with T2DM in both men and women, whereby the  
44 association was more pronounced in women. Employment status only affected T2DM in women.  
45  
46  
47  
48  
49  
50  
51  
52  
53  
54  
55  
56  
57  
58  
59  
60

## Article Summary

### Article focus

- The aim of this study was to examine disparities in the association of individual social class, employment status and neighborhood unemployment rate with prevalent T2DM by gender in a pooled analysis of five population-based regional studies.

### Key messages

- Social class was statistically significantly associated with T2DM among women and men, however, the association was stronger in women than men; particularly the individual employment status is an important determinant of T2DM in women.
- Between-study and between-neighborhood variance in T2DM was more pronounced in women, as already observed for obesity.
- Neighborhood unemployment rate **was** only associated with T2DM in men after the adjustment for individual variables.

### Strength and limitations of this study

- **Data of five population-based representative studies were applied linking data on the prevalence of T2DM to small areas and regions.**
- This study adds knowledge to the research on the interaction of gender, **social determinants and health on different levels.**
- Limitations were as follows: The cross-sectional design does not allow causal conclusions; T2DM was based on a self-reported physician's diagnosis; Administrative definitions of neighborhoods could result in exposure misclassification and underestimation of neighborhood effects; Problem of residential selection.

**List of Abbreviations**

|           |                                                                |
|-----------|----------------------------------------------------------------|
| CARLA     | Cardiovascular Disease, Living and Ageing in Halle Study       |
| CI        | Confidence Interval                                            |
| DHS       | Dortmund Health Study                                          |
| DIAB-CORE | Diabetes Collaborative Research of Epidemiologic Studies       |
| HNR       | Heinz Nixdorf Recall Study                                     |
| KORA S4   | Cooperative Health Research in the Region of Augsburg Survey 4 |
| MOR       | Median Odds Ratio                                              |
| OR        | Odds Ratio                                                     |
| SD        | Standard Deviation                                             |
| SE        | Standard Error                                                 |
| SHIP      | Study of Health in Pomerania                                   |
| T2DM      | Type 2 Diabetes Mellitus                                       |
| $V_A$     | Area-Level Variance                                            |

## Introduction

Gender differences in health inequality vary by the studied health outcome, the measure of social status and the stage of life course [1-3]. A systematic review of 23 case-control and cohort studies on socio-economic differences in the incidence of type 2 diabetes mellitus (T2DM) concluded that inequality in the risk of T2DM was stronger in women than men [4]. However, the results are diverse in respect to the magnitude in the association of T2DM and social status in men: A number of studies showed associations among both men and women [5-8], but there have been also studies published reporting associations only in women [9 10]. In respect to occupational status, contrasting results have been presented by Kumari et al. [11] and Maty et al. [12]. For instance, the first study showed a stronger inverse relationship between the civil service employment grade and the incidence of T2DM in men, applying data of the Whitehall study II [11].

Beyond an individual's social class, socio-economic characteristics of the neighborhood affect health [13-15]. As part of the Diabetes Collaborative Research of Epidemiologic Studies (DIAB-CORE) in Germany, Schipf et al. reported regional disparities in the age-standardized prevalence of T2DM [16]. In two recent studies, we found that the prevalence of T2DM varied across regions in Germany, even after adjustment for individual characteristics. These variations could in part be explained statistically by neighborhood unemployment rate within cities or by regional deprivation [17 18].

Gender differences may arise out of different exposures to social, psychosocial and behavioral determinants of health ("differential exposure hypothesis"). Another explanation might be a different vulnerability to health determinants, characteristics of the neighborhood and reaction to material, behavioral and psychosocial conditions of men and women ("differential vulnerability hypothesis") [2 19]. Differences in men's and women's perception of the neighborhood context and social status may be as well a source of health disparities. Stafford et al. examined gender differences in the relationship between self-rated health and the neighborhood context and found a larger impact of the neighborhood context on the health of women [19].

The aim of this study was (1) to investigate if the association of individual social class, individual employment status and neighborhood unemployment rate with prevalent T2DM differs for men and women in a pooled analysis of five population-based regional studies; and (2) to examine the extent to

1  
2  
3 which the prevalence of T2DM varies by gender between neighborhoods and regions in Germany. In a  
4 sub-analysis, we performed study-specific calculations of the relationship between T2DM and social  
5 class in men and women.  
6  
7

## 8 9 10 **Methods**

11  
12 Within the DIAB-CORE, cross-sectional data of five regional studies were pooled: the Cardiovascular  
13 Disease, Living and Ageing in Halle Study (CARLA), the Dortmund Health Study (DHS), the Heinz  
14 Nixdorf Recall Study (HNR), the Cooperative Health Research in the Region of Augsburg (KORA)  
15 S4 Study, and the Study of Health in Pomerania (SHIP). Data collection was conducted between 1997  
16 and 2006. The studies have similar study designs (population-based), sampling procedures (two-stage  
17 cluster or stratified random sampling) and response proportions (56%-69%). The studies were  
18 approved by local ethics committees and informed written consent was obtained from the study  
19 participants. Within the five studies, similar instruments, questionnaires and medical measurements  
20 were applied to collect data. Study designs have been described elsewhere in more detail [20-24].  
21

22  
23 In brief, data on 11,688 subjects aged 45-74 years were provided. 2,280 individuals living in rural  
24 areas of KORA and SHIP were excluded from the sample, because these subjects could not be  
25 assigned to spatial units below the level of municipalities; so, that our study was limited to urban  
26 areas. Study participants were assigned to neighborhoods via addresses of residence at baseline (8  
27 subjects could not be linked). The neighborhoods were defined by administrative units: statistical  
28 administrative units (subdivision of city districts) in HNR and DHS, city districts in CARLA, planning  
29 regions (summary of city districts) in KORA and postal code areas in SHIP. Participants resided in  
30 227 neighborhoods of the total 236 neighborhoods in the five study regions. After further exclusion of  
31 participants with missing information on individual characteristics (n=529), the final sample consisted  
32 of 8,871 residents in 226 neighborhoods.  
33  
34

35  
36 Based on the definition of the DIAB-CORE Consortium [25], a T2DM case was defined as self-  
37 reported physician-diagnosed T2DM or self-reported T2DM treatment (insulin, oral anti-diabetic  
38 agents, dietary treatment). Subjects reporting an age at diagnosis of 30 years or younger were excluded  
39 from the analyses to avoid inclusion of possible cases of type 1 diabetes.  
40  
41  
42  
43  
44  
45  
46  
47  
48  
49  
50  
51  
52  
53  
54  
55  
56  
57  
58  
59  
60



1  
2  
3 Social class was measured with a summary score of income and education. Its' operationalization  
4 was derived from the Winkler-Index of Socioeconomic Status [26], which summarizes information on  
5 individual educational and professional attainment, net household income and the occupational  
6 position of the main earner of a household. The three dimensions are transformed to an ordinal scale  
7 ranging from 1 to 7 and summed up to an index with a scale from 3 to 21 points. Since the information  
8 on occupational status was not available for our analysis, the index was solely based on education and  
9 income, ranging between 2 and 14 points. The index was divided into three groups: higher social class,  
10 middle social class and lower social class. Study participants were classified in four employment  
11 status groups: employed, retired and unemployed individuals as well as persons with other forms of  
12 employment, including participants in vocational retraining, housewives and housemen.

13  
14  
15  
16  
17  
18  
19  
20  
21  
22  
23 Neighborhood unemployment rate was applied as a proxy for the socio-economic status of the  
24 neighborhoods and calculated as the number of unemployed residents in relation to the working-age  
25 population (aged 15-64), obtained from the statistical offices of each considered city. The median year  
26 of the data collection period of each study was used as the reference year. A number of studies applied  
27 unemployment rate as a measure of deprivation and it was proven to be a strong predictor of health  
28 outcomes [22 27-29]. Campbell et al. highlighted that unemployment rate is a simple and good  
29 indicator for social and material deprivation, which is regularly updated and easily accessible [30]. For  
30 our analysis, equally-sized tertiles of study-specific neighborhood unemployment rate were used to  
31 detect a potential dose-response relationship. Hereafter, the authors refer to low, medium and high  
32 levels of unemployment rate in relative terms which corresponds, however, to considerably different  
33 levels of unemployment rate across study regions.

34  
35  
36  
37  
38  
39  
40  
41  
42  
43  
44  
45  
46  
47  
48  
49  
50  
51  
52  
53  
54  
55  
56  
57  
58  
59  
60  
The variable marital status summarized information whether a study participant lived with or without a  
partner. Moreover, life style variables including smoking status (current smoker; former smoker; never  
smoker), physical exercise (exercise; no exercise), body mass index (BMI) (<30 kg/m<sup>2</sup>; >=30 kg/m<sup>2</sup>)  
and alcohol consumption (no or moderate intake: women: <=20 grams per day; men: <=40 grams per  
day; high intake: women: >20 grams per day; men: >40 grams per day) were considered. Physical  
exercise was measured as hours spent per week on all kinds of exercise training excluding low level  
exercise like walking. Due to homogenization procedure, physical exercise was operationalized as any

1  
2  
3 exercise irrespective of frequency and duration. All variables were constructed following DIAB-  
4 CORE standard procedures for the homogenization of basic variables to ensure a high degree of  
5 comparability.  
6  
7  
8  
9

### 10 **Statistical Analysis**

11 Descriptive analysis included the calculation of crude and age-adjusted prevalence of T2DM (derived  
12 from a logistic regression) and corresponding 95% confidence intervals (CI) by gender for individual  
13 variables and neighborhood unemployment rate.  
14  
15  
16  
17

18 Our data set had a hierarchical structure including individuals (level 1), nested within neighborhoods  
19 (level 2), which were nested in study regions (level 3). To account for this data structure in our  
20 statistical analysis, multi-level modeling methods were applied. We conducted a series of mixed  
21 effects logistic regression models. First, we tested for interactions between gender and individual  
22 social class, employment status and neighborhood unemployment rate. To do so, we estimated  
23 regression models including terms for gender and social class, employment status or neighborhood  
24 unemployment rate as main effects and an interaction term for the effect of social class, employment  
25 status or neighborhood unemployment rate by gender. Second, gender-stratified analyses were  
26 conducted with a stepwise modeling strategy. The models were adjusted for the confounding variables  
27 age, marital status and the remaining social variables (social class/ employment status/ neighborhood  
28 unemployment rate) depending on the variable of interest. Life style factors, including smoking,  
29 alcohol consumption, BMI and physical activity were evaluated as potential mediators in the  
30 relationship between T2DM and individual social class, employment status or neighborhood  
31 unemployment rate. The results were presented as odds ratios (OR) with corresponding 95% CI.  
32  
33  
34  
35  
36  
37  
38  
39  
40  
41  
42  
43  
44  
45  
46  
47

48 Random effects were included to capture between-study and between-neighborhood variance reported  
49 as median odds ratios (MOR). The latter represents a transformation of the area-level variation ( $V_A$ ) on  
50 an OR-scale. The MOR gives the median value of all ORs between a randomly chosen highest- and  
51 lowest-risk-area **and** was calculated on the level of neighborhoods and study regions with the  
52 following equation:  $MOR = \exp(\sqrt{(2 * V_A)} * 0.6745)$ , where 0.6745 is the 75<sup>th</sup> centile of the  
53 cumulative distribution function of the normal distribution with mean zero and variance one [31 32].  
54  
55  
56  
57  
58  
59  
60

1  
2  
3 Study-specific analyses were performed and analyzed with meta-analytical tools. Due to the small  
4 number of cases **by study**, the social class variable had to be applied as a continuous measure in this  
5 sub-analysis (ranging between two points, highest social class, and 14 points, lowest social class). For  
6 this purpose, inverse-variance weighting was used to estimate fixed and random effects summary  
7 estimates and displayed in forest plots [33]. Q-statistic and  $I^2$  index were applied to assess  
8 heterogeneity and the extent of heterogeneity between study results respectively [34]. Analyses were  
9 performed in STATA/ SE 11.0.  
10  
11  
12  
13  
14  
15  
16  
17  
18

## 19 Results

20  
21 In total, **8,871** subjects residing in 226 neighborhoods in five urban regions were included in our  
22 analysis. Characteristics of the five studies are displayed in table 1. The crude T2DM prevalence was  
23 statistically significantly lower among women than men, 7.5% (95% CI 6.7-8.3) versus 10.0% (95%  
24 CI **9.1-10.9**) (significance derived from 95% CI). This pattern was observed in all five regional  
25 studies. Socio-demographic characteristics are reported in table 2. **Compared to men, women belonged**  
26 **more often to the lower or middle social class and a higher proportion was not employed**, except in  
27 SHIP. A higher proportion of women than men reported to live without a partner.  
28  
29  
30  
31  
32  
33  
34

35 The age-adjusted prevalence of T2DM was statistically significantly lower in **higher** social class  
36 women and men than in the **lower** social class (4.7% (95% CI: 3.9-5.7) respectively 9.7% (95% CI:  
37 **8.3-11.5**) in women; 6.9% (95% CI: 5.9-8.1) respectively **14.2%** (95% CI: 11.8-**16.8**) in men) (table  
38 3). Women had a statistically significantly lower age-adjusted T2DM prevalence than men over all  
39 social classes. Employed men had a statistically significantly lower age-adjusted T2DM prevalence  
40 with 7.3% (95% CI: 6.2-8.7) than retired men with 10.2% (95% CI: 8.8-11.7). Across neighborhoods,  
41 the highest age-adjusted prevalence of T2DM was found in women and men living in neighborhoods  
42 with a high unemployment rate (8.3% (95% CI: 7.2-9.5), respectively 10.9% (95% CI: 9.6-12.3)).  
43  
44  
45  
46  
47  
48  
49  
50  
51  
52  
53  
54  
55  
56  
57  
58  
59  
60  
Individuals living without a partner showed statistically significantly higher prevalence than  
individuals who lived with a partner irrespective of gender. Being physical inactive or having a BMI  
of 30 or above was statistically significantly associated with a higher T2DM prevalence in men and  
women.

1  
2  
3 In the fully adjusted multivariable analyses, the interaction terms of social class and gender were  
4 statistically significant. Among the employment status, we found significant multiplicative interactions  
5 between unemployed individuals and gender as well as between retired individuals and gender. The  
6 interaction terms between neighborhood unemployment rate and gender were not statistically  
7 significant.

8  
9  
10  
11  
12 The results of the gender-stratified multivariable regression analysis are presented in table 4. Among  
13 women and men, we found a statistically significant association of social class and T2DM. The social  
14 gradient in the odds of T2DM was reduced when the models were adjusted for age and the  
15 confounding variables. This reduction was particularly large in women. Overall, the association  
16 between social class and T2DM was stronger in women (lower versus higher social class: OR 2.68  
17 (95% CI: 1.66-4.34)) than men (lower versus higher social class: OR 1.77 (95% CI: 1.22-2.58))  
18 (model 3, table 4). Significant associations of employment status and T2DM were only found in  
19 women: In reference to employed women, retired women, unemployed women and women with other  
20 employment status had a 1.73, (95% CI: 1.02-2.92), a 1.77 (95% CI: 1.10-2.84) respectively a 1.64  
21 (95% CI: 1.01-2.67) higher odds to have T2DM (model 3, table 4). The significant elevated odds of  
22 T2DM in retired men were dissolved by adjustment for age.

23  
24  
25  
26  
27  
28  
29  
30  
31  
32  
33  
34  
35  
36  
37  
38  
39  
40  
41  
42  
43  
44  
45  
46  
47  
48  
49  
50  
51  
52  
53  
54  
55  
56  
57  
58  
59  
60  
Women residing in neighborhoods with a medium level of unemployment showed significant elevated  
odds to have T2DM (OR 1.45 (95% CI: 1.03-2.04)) (model 2), which was dissolved when the model  
was adjusted by confounding variables. In contrast, men residing in neighborhoods with a high level  
of unemployment showed a 52% (95% CI: 1.18-1.96) higher odds to have T2DM than men in low  
unemployment neighborhoods in the confounder-adjusted model 3. T2DM was no longer associated  
with marital status after adjustment by confounding variables in model 3 (living without versus living  
with a partner: OR 1.17 (95% CI: 0.90-1.51) in women, OR 1.20 (95% CI: 0.89-1.61) in men).

As part of mediation analysis, the association of life style variables and social class, employment  
status and neighborhood unemployment rate as well as the association between type 2 diabetes and life  
style variables were tested. Type 2 diabetes was related to BMI and physical activity in men and  
women, but smoking only in men and alcohol consumption not in both (not taken into further  
consideration). BMI, physical activity and smoking were tested to be statistically significantly

1  
2  
3 associated with social class, employment status and neighborhood unemployment rate with some  
4 exceptions: In women, physical exercise was not associated with employment status and smoking not  
5 related at all with social variables. Thereupon, the life style variables were introduced into model 4  
6 and the estimates of social class, employment status and neighborhood unemployment rate evaluated  
7 in respect to reductions in the association with T2DM. In men and women, we observed reductions in  
8 the effects of individual social class, employment status and neighborhood unemployment rate when  
9 introducing these life style factors in the analysis. Especially, the association between social class and  
10 T2DM was strongly reduced in women and men. This reduction was mainly driven by BMI in women  
11 (solely adjusted by BMI, higher versus lower social class OR 1.73 (95% CI: 1.05-2.85)) and physical  
12 exercise in men (solely adjusted by physical exercise, higher versus lower social class OR 1.59 (95%  
13 CI: 1.09-2.32)), providing evidence that these life style variables partly mediated the relationship  
14 between social class and type 2 diabetes.

15  
16  
17  
18  
19  
20  
21  
22  
23  
24  
25  
26  
27  
28  
29  
30  
31  
32  
33  
34  
35  
36  
37  
38  
39  
40  
41  
42  
43  
44  
45  
46  
47  
48  
49  
50  
51  
52  
53  
54  
55  
56  
57  
58  
59  
60  
Between-study and between-neighborhood variation in the prevalence of T2DM was larger in women than men. The prevalence of T2DM in men varied only between study regions (unadjusted model: MOR: 1.20;  $V_A$ : 0.04; SE: 0.03) (online supplemental material, table 5), which was fully explained statistically by age, social class, employment status, neighborhood unemployment rate, marital status and life style factors. The T2DM prevalence in women showed large variation across neighborhoods (unadjusted model: MOR: 1.47;  $V_A$ : 0.16; SE: 0.10) and study regions (unadjusted model: MOR: 1.31;  $V_A$ : 0.07; SE: 0.06), which was not dissolved by the considered explanatory variables (between-neighborhood variation: MOR: 1.32;  $V_A$ : 0.08; SE: 0.09, between-study variation: MOR: 1.29;  $V_A$ : 0.07; SE: 0.06) (model 5, table 5).

Regarding gender differences in health inequalities across regions, the effect estimates of the five studies were tested to be homogenous (figure 1). A low social class was associated with higher odds of T2DM, adjusted for age, employment status, marital status and neighborhood unemployment rate. In women, an increase of one point on the social class score (decrease in social class) was associated with an increase of 13% (pooled OR: 1.13 (95% CI: 1.06-1.21);  $I^2=14.0\%$ ;  $p=0.325$ ) in the odds of having T2DM. This association was smaller in men (pooled OR: 1.06 (95% CI: 1.00-1.11);  $I^2=0.0\%$ ;

1  
2  
3  $p=0.456$ ), although the differences between genders were not significant. This was observed in all  
4  
5 studies, except CARLA.  
6  
7  
8  
9

## 10 11 **Discussion**

12  
13 This study assessed gender differences in the association of individual social class, employment status  
14 and neighborhood unemployment rate with prevalent T2DM, using data from five regional population-  
15 based studies in Germany. Women and men belonging to the **lower** social class had a higher  
16 prevalence of T2DM. We found that the gradient in the prevalence of T2DM across social classes was  
17 clearly stronger in women than men. This pattern was consistent across all regions but CARLA and  
18 **mainly** in line with results of prior studies presenting only associations in women [7-9], or in men and  
19 women but more pronounced in women [5 6].  
20  
21  
22  
23  
24  
25  
26

27 In our study, the individual employment status was only associated with T2DM in women. Being  
28 unemployed, retired or a housewife yielded higher odds of T2DM. However, since we were not able to  
29 consider occupational position in our analyses, the interpretation of these findings is limited. In the  
30 literature, two contrasting theories are discussed for the effects of paid employment on women's  
31 health. Employment can have a health promoting function due to role accumulation in contrast to the  
32 monotony, isolation, low **social** status and self-esteem of housewives. A health damaging effect could  
33 arise due to role strains, e.g. stress due to multiple roles, and heavy job demands [35 36].  
34  
35  
36  
37  
38  
39  
40

41 Men residing in neighborhoods with a high level of unemployment rate were more likely to have  
42 T2DM than men in better-off neighborhoods. These effects remained even after adjustment for  
43 confounding and mediator variables, whereas associations between neighborhood unemployment rate  
44 and T2DM in women were dissolved by the introduction of confounding variables. These deviating  
45 effects of neighborhood unemployment rate between men and women may be explained by the fact  
46 that men were more often engaged in employment and, hence, depend more on the regional labor  
47 market and its employment opportunities than women. Potential underlying mechanisms in the  
48 relationship between neighborhood unemployment **rate** and T2DM include neighborhood resources  
49 such as the availability of grocery stores offering healthy food and recreational facilities [15], the  
50  
51  
52  
53  
54  
55  
56  
57  
58  
59  
60

1  
2  
3 adoption and maintenance of risky health behavior and psychosocial factors such as chronic stress [13  
4  
5 37].

6  
7 Between-study and between-neighborhood variation in the prevalence of T2DM was larger in women  
8  
9 than men. We found that individual social class, employment status and neighborhood unemployment  
10  
11 rate played an important role in explaining statistically regional differences in the prevalence of T2DM  
12  
13 in men. A large fraction of the detected variation in the prevalence of T2DM on the level of  
14  
15 neighborhoods and regions remained statistically unexplained in women, suggesting that there were  
16  
17 characteristics on the individual, neighborhood and regional level that determine the presence of  
18  
19 T2DM and which were not considered in our analysis. Previous work on regional variation in self-  
20  
21 rated health and BMI also found larger regional variation in women [19 38 39].

22  
23 The gender-specific pattern in the association between social class and the prevalence of T2DM need  
24  
25 to be further explored, since the pathways are still unknown [6]. Macintyre et al. noted that socio-  
26  
27 economic determinants vary in their meaning for men and women, since both genders are socialized in  
28  
29 different ways with diverging social roles and coping strategies against stress; they hold different  
30  
31 occupational positions in the labor market and have dissimilar access to material and psycho-social  
32  
33 resources [40]. In our study, overall women were less likely to be in the **higher** social class and were  
34  
35 less often employed.

36  
37 To gain more insight in mechanisms of social inequalities on health, the analysis of population  
38  
39 subgroups is essential, since one limitation of the existing literature is the assumption that mechanisms  
40  
41 operate identically in different population groups [19]. This work adds knowledge to the research on  
42  
43 the interaction of gender, social determinants and health. So far, only few studies examined this  
44  
45 interaction with regard to T2DM and to our knowledge no study considered neighborhood  
46  
47 unemployment rate in regard to that, so far. Data sources providing representative population-based  
48  
49 data on the prevalence of T2DM with a linkage to small areas and regions are still rare.

50  
51 Some limitations of this work should be acknowledged. We analyzed cross-sectional data with limited  
52  
53 causal conclusions. We could not use occupation as an indicator of social class in our analysis since  
54  
55 the assessment was not comparable between studies. The prevalence of T2DM was based on a self-  
56  
57 reported T2DM physician's diagnosis only, which could not be validated. Therefore, undetected type 2  
58  
59

1  
2  
3 diabetes could be a source of bias. However, Okura et al. found a high accuracy between self-reports  
4 and medical records for diabetes and other chronic diseases [41]. Recently, Jackson et al. concluded  
5 that self-reported diabetes is a valid outcome for observational studies from an accuracy of 91.8% of  
6 self-reported prevalent diabetes validated by medical records based on the Women's Health Initiative  
7 [42]. Another potential limitation is the selection by response (response proportions: 56%-69%),  
8 which might have affected our results. The exclusion of participants from the initial sample due to  
9 missing information on individual characteristics (mainly due to missing information on net household  
10 income) could have led to an underestimation of the social gradient in T2DM, because these subjects  
11 were on average older, more often female, out of employment and with a lower educational status.  
12 However, a sensitivity analysis showed similar results applying education as measure of social class.  
13 We used administrative definitions for neighborhoods. Hence, neighborhoods in our study may not  
14 capture the immediate neighborhood of residence of our study participants. This could lead to  
15 exposure misclassification and underestimation of neighborhood effects [43]. The applied  
16 administrative definition of neighborhoods differed between studies and neighborhoods were diverse  
17 according to their area and population size. Another challenge in the research of neighborhood impact  
18 on health is the residential selection. Individuals may be selected into neighborhoods due to individual  
19 characteristics, such as residents of poor areas cannot afford moving to better-off neighborhoods [44  
20 45]. Finally, we had no information on the residential history of the study participants, which could  
21 result in an underestimation of neighborhood effects on health [46].  
22  
23  
24  
25  
26  
27  
28  
29  
30  
31  
32  
33  
34  
35  
36  
37  
38  
39  
40  
41  
42

43 In conclusion, our study identified different relationships of individual social class, employment status  
44 and neighborhood unemployment rate with the prevalence of T2DM for women and men. In both men  
45 and women, the prevalence of T2DM was inversely related to social class. This social gradient was  
46 stronger in women. Regional variance in the T2DM prevalence was larger in women than men.  
47 Whereas the major proportion of the variance in the T2DM prevalence remained statistically  
48 unexplained in women, the regional variance in men was low and completely explained by the  
49 considered variables.  
50  
51  
52  
53  
54  
55  
56  
57  
58  
59  
60



**Table 1: Characteristics of the 5 Population-Based Studies (CARLA, DHS, KORA, HNR, and SHIP, Germany, 1997-2006)<sup>a</sup>**

|                                                              | <b>CARLA</b>               | <b>DHS</b>                           | <b>KORA</b>                | <b>HNR</b>                            | <b>SHIP</b>                            |
|--------------------------------------------------------------|----------------------------|--------------------------------------|----------------------------|---------------------------------------|----------------------------------------|
| <b>Study period</b>                                          | 12/2002-01/2006            | 09/2003-06/2004                      | 10/1999-04/2001            | 12/2000-06/2003                       | 10/1997-03/2001                        |
| <b>Federal state (Region)</b>                                | Saxony-Anhalt (east)       | North Rhine-Westphalia (west)        | Bavaria (south)            | North Rhine-Westphalia (west)         | Mecklenburg-West Pomerania (northeast) |
| <b>Sampling</b>                                              | stratified random sampling | stratified random sampling           | two-stage cluster sampling | stratified random sampling            | two-stage cluster sampling             |
| <b>Cities</b>                                                | Halle (Saale)              | Dortmund                             | Augsburg                   | Bochum, Essen, Mülheim                | Greifswald, Stralsund                  |
| <b>Neighborhoods (n)/ Types</b>                              | 43/ city districts         | 62/ statistical administrative units | 17/ planning regions       | 108/ statistical administrative units | 6/ clusters of city districts          |
| <b>Total population (neighborhood range)</b>                 | 238,078 (18 - 19,210)      | 587,607 (476 - 25,686)               | 252,725 (2,730 - 37,246)   | 1,142,112 (262 - 32,466)              | 115,962 (5,230 - 31,154)               |
| <b>Unemployment rate (%; neighborhood range)<sup>b</sup></b> | 14.1 (3.9 - 22.5)          | 15.3 (5.0 - 27.7)                    | 4.8 (1.9 - 7.6)            | 7.5 (1.7 - 13.5)                      | 13.1 (9.9 - 14.9)                      |

<sup>a</sup> the Cardiovascular Disease, Living and Ageing in Halle Study (CARLA), the Dortmund Health Study (DHS), the Heinz Nixdorf Recall Study (HNR), the Cooperative Health Research in the Region of Augsburg (KORA) S4 Study, and the Study of Health in Pomerania (SHIP)

<sup>b</sup> Data on neighborhood unemployment were collected in the year 1999 in SHIP, in 2000 in KORA, in the years 2001 in HNR and in 2003 in CARLA and DHS

**Table 2: Participants Characteristics in the 5 Population-Based Studies (CARLA, DHS, KORA, HNR, SHIP, Germany, 1997-2006)<sup>a</sup>**

| Study                                                           | CARLA            |                     | DHS             |                | KORA                 |               | HNR               |                     | SHIP            |                |
|-----------------------------------------------------------------|------------------|---------------------|-----------------|----------------|----------------------|---------------|-------------------|---------------------|-----------------|----------------|
|                                                                 | men              | women               | men             | women          | men                  | women         | men               | women               | men             | women          |
| <b>Participants 45-74 with full information</b>                 | <b>719</b>       | <b>638</b>          | <b>414</b>      | <b>411</b>     | <b>533</b>           | <b>494</b>    | <b>2,257</b>      | <b>2,175</b>        | <b>615</b>      | <b>615</b>     |
| <b>Number of neighborhoods (range of residing participants)</b> | 37 (3-139)       |                     | 60 (1-42)       |                | 17 (13-141)          |               | 106 (1-140)       |                     | 6 (95-396)      |                |
| <b>Crude diabetes prevalence (%) (95% CI)</b>                   | 12.9 (10.6-15.6) | 12.1 (9.6-14.9)     | 11.8 (8.9-15.3) | 7.8 (5.4-10.8) | <b>7.1 (5.1-9.7)</b> | 5.5 (3.6-7.9) | 8.9 (7.8-10.2)    | 5.9 (5.0-7.0)       | 11.7 (9.3-14.5) | 9.6 (7.4-12.2) |
| <b>Mean age (SD)</b>                                            | 61.0 (8.0)       | 60.4 ( <b>7.7</b> ) | 60.9 (8.4)      | 59.7 (8.5)     | 58.9 (8.6)           | 58.8 (8.4)    | <b>59.5</b> (7.8) | 59.4 ( <b>7.8</b> ) | 60.3 (8.3)      | 58.8 (8.3)     |
| <b>Social class % (n)</b>                                       |                  |                     |                 |                |                      |               |                   |                     |                 |                |
| lower                                                           | 7.4 (53)         | 13.0 (83)           | 11.1 (46)       | 23.8 (98)      | <b>6.0 (32)</b>      | 16.4 (81)     | 6.2 (140)         | 19.7 (429)          | 12.2 (75)       | 26.0 (160)     |
| middle                                                          | 61.3 (441)       | 65.1 (415)          | 46.1 (191)      | 46.2 (190)     | <b>48.4</b> (258)    | 54.1 (267)    | 53.0 (1195)       | 55.9 (1215)         | 67.3 (414)      | 63.1 (388)     |
| higher                                                          | 31.3 (225)       | 21.9 (140)          | 42.8 (177)      | 29.9 (123)     | <b>45.6</b> (243)    | 29.6 (146)    | 40.9 (922)        | 24.4 (531)          | 20.5 (126)      | 10.9 (67)      |
| <b>Employment status % (n)</b>                                  |                  |                     |                 |                |                      |               |                   |                     |                 |                |
| employed                                                        | 34.9 (251)       | 30.6 (195)          | 38.7 (160)      | 34.8 (143)     | <b>50.3</b> (268)    | 35.0 (173)    | 46.4 (1047)       | 31.9 (693)          | 33.3 (205)      | 35.1 (216)     |
| retired                                                         | 48.1 (346)       | 52.0 (332)          | 51.9 (215)      | 33.8 (139)     | <b>43.0</b> (229)    | 39.3 (194)    | 47.6 (1075)       | 37.4 (813)          | 54.0 (332)      | 49.6 (305)     |
| unemployed                                                      | 15.2 (109)       | 12.4 (79)           | 7.3 (30)        | 6.1 (25)       | 6.4 (34)             | 8.9 (44)      | 5.7 (129)         | 7.5 (162)           | 12.4 (76)       | 14.5 (89)      |
| others                                                          | 1.8 (13)         | 5.0 (32)            | 2.2 (9)         | 25.3 (104)     | 0.4 (2)              | 16.8 (83)     | 0.3 (6)           | 23.3 (507)          | 0.3 (2)         | 0.8 (5)        |
| <b>Marital status (%)</b>                                       |                  |                     |                 |                |                      |               |                   |                     |                 |                |
| living with a partner                                           | 89.0 (640)       | 73.4 (468)          | 86.7 (359)      | 71.5 (294)     | <b>82.4</b> (439)    | 67.2 (332)    | 90.2 (2035)       | 74.7 (1624)         | 88.3 (543)      | 68.8 (423)     |
| living without a partner                                        | 11.0 (79)        | 26.7 (170)          | 13.3 (55)       | 28.5 (117)     | <b>17.6</b> (94)     | 32.8 (162)    | 9.8 (222)         | 25.3 (551)          | 11.7 (72)       | 31.2 (192)     |

<sup>a</sup> the Cardiovascular Disease, Living and Ageing in Halle Study (CARLA), the Dortmund Health Study (DHS), the Heinz Nixdorf Recall Study (HNR), the Cooperative Health Research in the Region of Augsburg (KORA) S4 Study, and the Study of Health in Pomerania (SHIP)

**Table 3: Gender-Stratified Crude and Age-Adjusted Prevalence of Type 2 Diabetes Mellitus by Individual Variables and Neighborhood Unemployment Rate with Data From Five Population-Based Studies (CARLA, DHS, KORA, HNR, SHIP, Germany, 1997-2006)<sup>a, b</sup>**

|                          | Men  |                  |      |           |                         |           | Women |                  |      |           |                         |          |
|--------------------------|------|------------------|------|-----------|-------------------------|-----------|-------|------------------|------|-----------|-------------------------|----------|
|                          | No.  | Crude Prevalence |      |           | Age-adjusted Prevalence |           | No.   | Crude Prevalence |      |           | Age-adjusted Prevalence |          |
|                          |      | T2D Cases        | %    | 95% CI    | %                       | 95% CI    |       | T2D Cases        | %    | 95% CI    | %                       | 95% CI   |
| <b>Social class</b>      |      |                  |      |           |                         |           |       |                  |      |           |                         |          |
| lower                    | 346  | 57               | 16.5 | 12.7-20.8 | 14.2                    | 11.8-16.8 | 851   | 104              | 12.2 | 10.1-14.6 | 9.7                     | 8.3-11.5 |
| middle                   | 2499 | 267              | 10.7 | 9.5-12.0  | 9.7                     | 8.7-10.8  | 2475  | 194              | 7.8  | 6.8-9.0   | 6.6                     | 5.8-7.5  |
| higher                   | 1693 | 129              | 7.6  | 6.4-9.0   | 6.9                     | 5.9-8.1   | 1007  | 26               | 2.6  | 1.7-3.8   | 4.7                     | 3.8-5.6  |
| <b>Employment status</b> |      |                  |      |           |                         |           |       |                  |      |           |                         |          |
| employed                 | 1931 | 126              | 6.5  | 5.5-7.7   | 7.3                     | 6.2-8.7   | 1420  | 39               | 2.8  | 2.0-3.7   | 5.5                     | 4.6-6.7  |
| retired                  | 2197 | 290              | 13.2 | 11.8-14.7 | 10.2                    | 8.8-11.7  | 1783  | 213              | 11.9 | 10.5-13.5 | 7.8                     | 6.6-9.1  |
| unemployed               | 378  | 32               | 8.5  | 5.9-11.7  | 10.3                    | 8.0-13.2  | 399   | 26               | 6.5  | 4.3-9.4   | 7.8                     | 6.0-10.2 |
| others                   | 32   | 5                | 15.6 | 5.3-32.8  | 8.7                     | 6.4-11.6  | 731   | 46               | 6.3  | 4.6-8.3   | 6.6                     | 5.0-8.6  |
| <b>Marital status</b>    |      |                  |      |           |                         |           |       |                  |      |           |                         |          |
| Living with a partner    | 4016 | 387              | 9.6  | 8.7-10.6  | 8.7                     | 7.9-9.5   | 3141  | 199              | 6.3  | 5.5-7.2   | 6.2                     | 5.4-7.0  |
| Living without a partner | 522  | 66               | 12.6 | 9.9-15.8  | 11.5                    | 9.7-13.6  | 1192  | 125              | 10.5 | 8.8-12.4  | 8.3                     | 7.1-9.7  |
| <b>Physical exercise</b> |      |                  |      |           |                         |           |       |                  |      |           |                         |          |
| physical exercise        | 2474 | 194              | 7.8  | 6.8-9.0   | 7.5                     | 6.6-8.4   | 2266  | 136              | 6.0  | 5.1-7.1   | 5.5                     | 4.8-6.3  |
| no physical exercise     | 2013 | 258              | 12.8 | 11.4-14.4 | 10.9                    | 9.8-12.2  | 1990  | 178              | 8.9  | 7.7-10.3  | 8.1                     | 7.2-9.2  |
| <b>Smoking</b>           |      |                  |      |           |                         |           |       |                  |      |           |                         |          |
| never smoked             | 1370 | 113              | 8.2  | 6.8-9.8   | 8.4                     | 7.2-9.7   | 2502  | 208              | 8.3  | 7.3-9.5   | 6.5                     | 5.7-7.4  |
| ex-smoker                | 2067 | 241              | 11.7 | 10.3-13.1 | 9.5                     | 8.5-10.8  | 936   | 72               | 7.7  | 6.1-9.6   | 7.5                     | 6.3-8.8  |
| current smoker           | 1050 | 98               | 9.3  | 7.6-11.3  | 8.7                     | 7.3-10.3  | 815   | 34               | 4.2  | 2.9-5.8   | 6.8                     | 5.6-8.2  |
| <b>BMI</b>               |      |                  |      |           |                         |           |       |                  |      |           |                         |          |
| < 30                     | 3220 | 260              | 8.1  | 7.2-9.1   | 6.6                     | 5.8-7.4   | 2996  | 123              | 4.1  | 3.4-4.9   | 4.7                     | 4.1-5.4  |

|                            |      |     |      |           |      |           |      |     |      |           |      |           |
|----------------------------|------|-----|------|-----------|------|-----------|------|-----|------|-----------|------|-----------|
| ≥ 30                       | 1267 | 192 | 15.2 | 13.2-17.2 | 15.4 | 13.8-17.3 | 1260 | 191 | 15.2 | 13.2-17.3 | 11.4 | 10.0-12.9 |
| <b>Alcohol consumption</b> |      |     |      |           |      |           |      |     |      |           |      |           |
| no or moderate intake      | 3974 | 414 | 10.4 | 9.5-11.4  | 9.2  | 8.4-10.2  | 4018 | 303 | 7.5  | 6.7-8.4   | 6.8  | 6.1-7.6   |
| high intake                | 513  | 38  | 7.4  | 5.3-10.0  | 7.4  | 5.6-9.6   | 238  | 11  | 4.6  | 2.3-8.1   | 5.4  | 4.0-7.3   |
| <b>Unemployment rate</b>   |      |     |      |           |      |           |      |     |      |           |      |           |
| low                        | 1519 | 125 | 8.2  | 6.9-9.7   | 7.4  | 6.4-8.6   | 1384 | 85  | 6.1  | 4.9-7.5   | 5.6  | 4.8-6.6   |
| medium                     | 1579 | 144 | 9.1  | 7.7-10.6  | 8.7  | 7.6-9.9   | 1527 | 120 | 7.9  | 6.6-9.3   | 6.6  | 5.7-7.6   |
| high                       | 1440 | 184 | 12.8 | 11.1-14.6 | 10.9 | 9.6-12.3  | 1422 | 119 | 8.4  | 7.0-9.9   | 8.3  | 7.2-9.5   |

<sup>a</sup> the Cardiovascular Disease, Living and Ageing in Halle Study (CARLA), the Dortmund Health Study (DHS), the Heinz Nixdorf Recall Study (HNR), the Cooperative Health Research in the Region of Augsburg (KORA) S4 Study, and the Study of Health in Pomerania (SHIP)

<sup>b</sup> Age-adjusted prevalence are derived from logistic regression models

**Table 4: Gender-Stratified Multi-Level Logistic Regression of Type 2 Diabetes Mellitus by Individual Social Class, Employment Status and Neighborhood Unemployment Rate <sup>a, b, c</sup>**

|                               |       | Social class<br>(Reference: <b>higher</b> social class) |                         | Employment status<br>(Reference: employed) |                         |                         | Unemployment rate<br>(Reference: low unemployment rate) |                         |
|-------------------------------|-------|---------------------------------------------------------|-------------------------|--------------------------------------------|-------------------------|-------------------------|---------------------------------------------------------|-------------------------|
|                               |       | middle                                                  | <b>lower</b>            | retired                                    | unemployed              | others                  | <b>medium</b>                                           | high                    |
|                               |       | OR (95% CI)                                             | OR (95% CI)             | OR (95% CI)                                | OR (95% CI)             | OR (95% CI)             | OR (95% CI)                                             | OR (95% CI)             |
| <b>Model 1<sup>d</sup></b>    | Women | 3.11 (2.04-4.73)                                        | 5.37 (3.44-8.40)        | 4.71 (3.31-6.69)                           | 2.36 (1.41-3.95)        | 2.65 (1.69-4.14)        | 1.45 (1.03-2.04)                                        | 1.26 (0.89-1.79)        |
|                               | Men   | <b>1.42 (1.14-1.77)</b>                                 | <b>2.31 (1.65-3.24)</b> | <b>2.14 (1.71-2.66)</b>                    | 1.24 (0.82-1.87)        | <b>2.38 (0.89-6.33)</b> | <b>1.15 (0.89-1.49)</b>                                 | 1.58 (1.24-2.02)        |
| <b>Model 2<sup>e</sup></b>    | Women | 2.25 (1.46-3.45)                                        | 3.16 (1.99-5.03)        | 2.01 (1.26-3.21)                           | 2.07 (1.23-3.48)        | 1.77 (1.10-2.85)        | 1.45 (1.03-2.04)                                        | 1.25 (0.88-1.78)        |
|                               | Men   | 1.21 (0.96-1.51)                                        | <b>2.03 (1.44-2.86)</b> | <b>1.25 (0.90-1.73)</b>                    | <b>1.17 (0.78-1.76)</b> | <b>1.98 (0.74-5.29)</b> | <b>1.12 (0.87-1.45)</b>                                 | <b>1.62 (1.27-2.07)</b> |
| <b>Model 3<sup>f</sup></b>    | Women | 2.02 (1.31-3.13)                                        | 2.68 (1.66-4.34)        | 1.77 (1.10-2.84)                           | 1.73 (1.02-2.92)        | 1.64 (1.01-2.67)        | 1.36 (0.96-1.93)                                        | 1.13 (0.79-1.62)        |
|                               | Men   | 1.13 (0.89-1.43)                                        | <b>1.78 (1.22-2.58)</b> | 1.09 (0.77-1.52)                           | 0.94 (0.61-1.44)        | <b>2.00 (0.74-5.39)</b> | 1.08 (0.83-1.40)                                        | 1.52 (1.18-1.96)        |
| <b>Model 4<sup>g, h</sup></b> | Women | <b>1.52 (0.98-2.37)</b>                                 | <b>1.66 (1.01-2.75)</b> | <b>1.66 (1.02-2.69)</b>                    | <b>1.67 (0.97-2.88)</b> | 1.69 (1.02-2.78)        | <b>1.20 (0.85-1.69)</b>                                 | <b>1.02 (0.72-1.46)</b> |
|                               | Men   | 1.03 (0.81-1.31)                                        | <b>1.48 (1.00-2.18)</b> | <b>1.01 (0.72-1.42)</b>                    | 0.91 (0.59-1.40)        | <b>1.69 (0.62-4.61)</b> | <b>1.06 (0.82-1.38)</b>                                 | <b>1.46 (1.13-1.87)</b> |

<sup>a</sup> Odds Ratios and 95% Confidence Intervals derived from Three-Level Mixed Effects Logistic Regression Models

<sup>b</sup> Data From Five Population-Based Studies: the Cardiovascular Disease, Living and Ageing in Halle Study (CARLA), the Dortmund Health Study (DHS), the Heinz Nixdorf Recall Study (HNR), the Cooperative Health Research in the Region of Augsburg (KORA) S4 Study, and the Study of Health in Pomerania (SHIP), Germany, 1997-2006

<sup>c</sup> men: n=4,538, women: n=4,333

<sup>d</sup> Model 1: unadjusted

<sup>e</sup> Model 2: adjusted by age

<sup>f</sup> Model 3: adjusted by age, social class, employment status, neighborhood unemployment rate, marital status

<sup>g</sup> Model 4: adjusted by age, social class, employment status, neighborhood unemployment rate, marital status, BMI, physical exercise, smoking (only for men)

<sup>h</sup> Sample size n=8,732 due to 139 missing values on life style factors

**Figure 1: Meta Analysis of Five Logistic Regressions of Type 2 Diabetes Mellitus for the Social Class Score (Range: 2-14 Points) in Women and Men<sup>a, b, c, d</sup>**

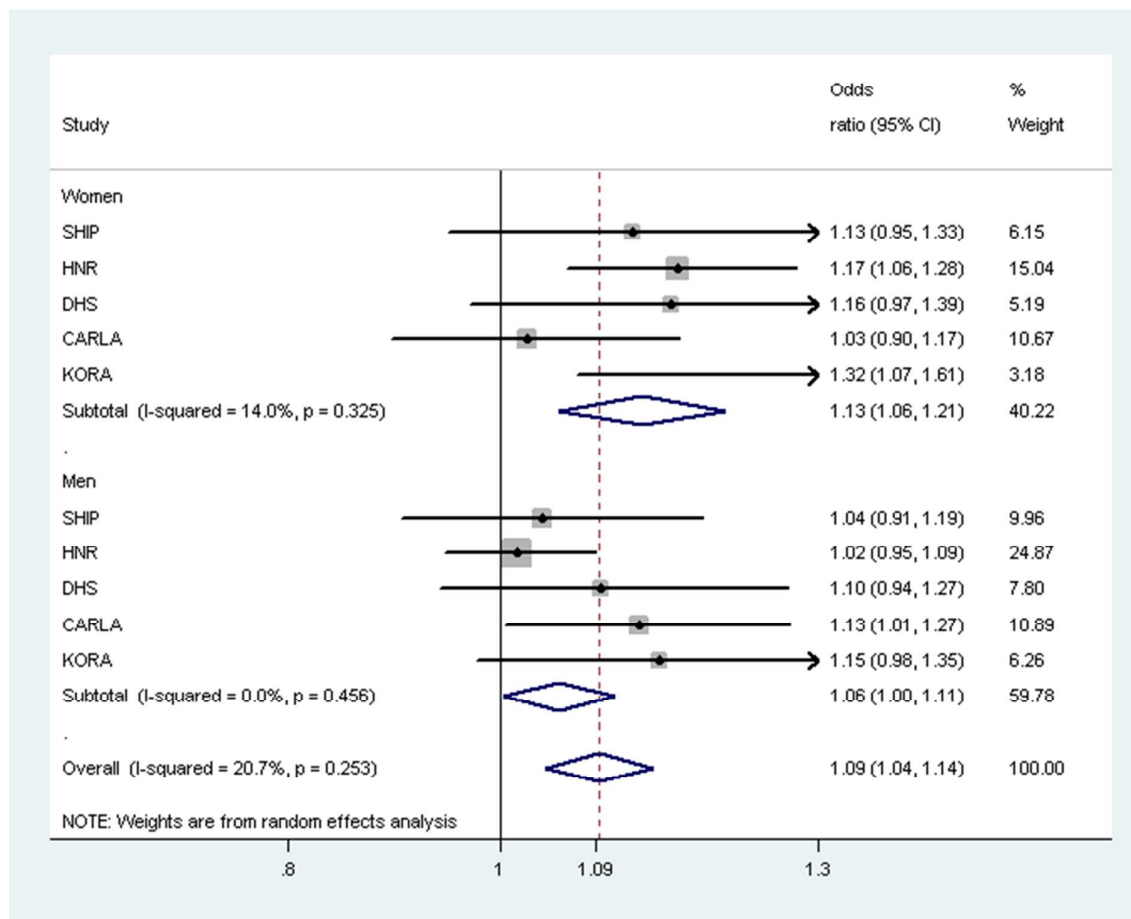

<sup>a</sup> Odds Ratios and 95% Confidence Intervals derived from Study-Stratified Two-Level Mixed Effects Logistic Regression Models

<sup>b</sup> Adjusted for Age, Employment Status, Marital Status and Neighborhood Unemployment Rate

<sup>c</sup> Data From Five Population-Based Studies: the Cardiovascular Disease, Living and Ageing in Halle Study (CARLA), the Dortmund Health Study (DHS), the Heinz Nixdorf Recall Study (HNR), the Cooperative Health Research in the Region of Augsburg (KORA) S4 Study, and the Study of Health in Pomerania (SHIP), Germany, 1997-2006

<sup>d</sup> Heterogeneity tested via Q-statistic and I<sup>2</sup>-index

1  
2  
3  
4  
5  
6  
7  
8  
9  
10  
11  
12  
13  
14  
15  
16  
17  
18  
19  
20  
21  
22  
23  
24  
25  
26  
27  
28  
29  
30  
31  
32  
33  
34  
35  
36  
37  
38  
39  
40  
41  
42  
43  
44  
45  
46  
47  
48  
49  
50  
51  
52  
53  
54  
55  
56  
57  
58  
59  
60

**Declaration of Competing Interests**

Nothing to declare.

For peer review only

1  
2  
3 **Data sharing statement**  
4

5 There is no additional data available.  
6  
7  
8  
9  
10  
11  
12  
13  
14  
15  
16  
17  
18  
19  
20  
21  
22  
23  
24  
25  
26  
27  
28  
29  
30  
31  
32  
33  
34  
35  
36  
37  
38  
39  
40  
41  
42  
43  
44  
45  
46  
47  
48  
49  
50  
51  
52  
53  
54  
55  
56  
57  
58  
59  
60

For peer review only



1  
2  
3  
4  
5  
6  
7  
8  
9  
10  
11  
12  
13  
14  
15  
16  
17  
18  
19  
20  
21  
22  
23  
24  
25  
26  
27  
28  
29  
30  
31  
32  
33  
34  
35  
36  
37  
38  
39  
40  
41  
42  
43  
44  
45  
46  
47  
48  
49  
50  
51  
52  
53  
54  
55  
56  
57  
58  
59  
60

**Patient consent**

Obtained.

For peer review only

**Contribution**

The authors G.M., K.B. (DHS), S.H., K.H.G. (CARLA), S.M., N.P. (HNR), S.S., H.V. (SHIP), W.M., and C.M. (KORA) researched data. G.M. developed the study conception, performed the statistical analyses and drafted the manuscript. K.B. contributed to the study conception, statistical analyses and data interpretation. W.R. and T.T. contributed to the pooling of data. All authors critically reviewed the manuscript and contributed to the interpretation of the results.

For peer review only

### Funding statement

This work was supported by the Competence Network Diabetes mellitus of the German Federal Ministry of Education and Research (BMBF, grant 01GI0814).

The Study of Health in Pomerania (SHIP) is part of the Community Medicine Research net (<http://www.community-medicine.de>) at the University of Greifswald, Germany. Funding was provided by grants from the German Federal Ministry of Education and Research (BMBF, grant 01ZZ0403); the Ministry for Education, Research, and Cultural Affairs; and the Ministry for Social Affairs of the Federal State of Mecklenburg–West Pomerania.

The Cardiovascular Disease, Living and Ageing in Halle Study (CARLA) was supported by a grant from the Deutsche Forschungsgemeinschaft as part of the Collaborative Research Center 598 “Heart failure in the elderly - cellular mechanisms and therapy” at the Medical Faculty of the Martin-Luther-University Halle-Wittenberg, by a grant of the Wilhelm-Roux Programme of the Martin-Luther-University Halle-Wittenberg; by the Ministry of Education and Cultural Affairs of Saxony-Anhalt, and by the Federal Employment Office.

The collection of socio-demographic and clinical data in the Dortmund Health Study (DHS) was supported by the German Migraine & Headache Society (DMKG) and by unrestricted grants of equal share from Astra Zeneca, Berlin Chemie, Boots Healthcare, Glaxo-Smith-Kline, McNeil Pharma (former Woelm Pharma), MSD Sharp & Dohme and Pfizer to the University of Muenster.

We thank the Heinz Nixdorf Foundation (Germany) for the generous support of the Heinz Nixdorf Recall Study (HNR). The study is also supported by the German Ministry of Education and Science. We acknowledge the support of the Sarstedt AG & Co. concerning laboratory equipment. We thank the investigative group and the study staff of the Heinz Nixdorf Recall Study.

The KORA research platform (KORA, Cooperative Health Research in the Region of Augsburg) was initiated and financed by the Helmholtz Zentrum München - German Research Center for Environmental Health, which is funded by the German Federal Ministry of Education and Research and by the State of Bavaria. The KORA Diabetes Study was partly funded by a German Research Foundation project grant to W.R. from the German Diabetes Center.

1  
2  
3 The German Diabetes Center is funded by the German Federal Ministry of Health, and the Ministry of  
4  
5 School, Science and Research of the State of North-Rhine-Westphalia.  
6  
7  
8  
9  
10  
11  
12  
13  
14  
15  
16  
17  
18  
19  
20  
21  
22  
23  
24  
25  
26  
27  
28  
29  
30  
31  
32  
33  
34  
35  
36  
37  
38  
39  
40  
41  
42  
43  
44  
45  
46  
47  
48  
49  
50  
51  
52  
53  
54  
55  
56  
57  
58  
59  
60

For peer review only

**Reference list**

1. Thurston RC, Kubzansky LD, Kawachi I, Berkman LF. Is the Association between Socioeconomic Position and Coronary Heart Disease Stronger in Women than in Men? *AM J EPIDEMIOL* 2005;**162**(1):57-65
2. Denton M, Prus S, Walters V. Gender differences in health: a Canadian study of the psychosocial, structural and behavioural determinants of health. *SOC SCI MED* 2004;**58**(12):2585-600
3. MacIntyre S, Hunt K. Socio-economic Position, Gender and Health: How Do They Interact? *J HEALTH PSYCHOL* 1997;**2**(3):315-34
4. Agardh E, Allebeck P, Hallqvist J, Moradi T, Sidorchuk A. Type 2 diabetes incidence and socio-economic position: a systematic review and meta-analysis. *International Journal of Epidemiology* 2011;**40**(3):804-18
5. Tanaka T, Gjonca E, Gulliford MC. Income, wealth and risk of diabetes among older adults: cohort study using the English longitudinal study of ageing. *EUR J PUBLIC HEALTH* 2011
6. Robbins J, Vaccarino V, Zhang H, Kasl S. Socioeconomic status and type 2 diabetes in African American and non-Hispanic white women and men: evidence from the Third National Health and Nutrition Examination Survey. *AM J PUBLIC HEALTH* 2001;**91**(1):76-83
7. Tang M, Chen Y, Krewski D. Gender-related differences in the association between socioeconomic status and self-reported diabetes. *INT J EPIDEMIOL* 2003;**32**(3):381-85
8. Ross NA, Gilmour H, Dasgupta K. 14-year diabetes incidence: The role of socio-economic status. *Health Reports Statistics Canada* 2010;**21**(3)
9. Imkampe AK, Gulliford MC. Increasing socio-economic inequality in type 2 diabetes prevalence—Repeated cross-sectional surveys in England 1994–2006. *EUR J PUBLIC HEALTH* 2011;**21**(4):484-90
10. Smith BT, Lynch JW, Fox CS, et al. Life-Course Socioeconomic Position and Type 2 Diabetes Mellitus. *AM J EPIDEMIOL* 2011;**173**(4):438-47
11. Kumari M, Head J, Marmot M. Prospective Study of Social and Other Risk Factors for Incidence of Type 2 Diabetes in the Whitehall II Study. *Arch Intern Med* 2004;**164**(17):1873-80 doi: 10.1001/archinte.164.17.1873[published Online First: Epub Date].

- 1  
2  
3 12. Maty SC, Everson-Rose SA, Haan MN, Raghunathan TE, Kaplan GA. Education, income,  
4  
5 occupation, and the 34-year incidence (1965–99) of Type 2 diabetes in the Alameda County  
6  
7 Study. *International Journal of Epidemiology* 2005;**34**(6):1274-81 doi:  
8  
9 10.1093/ije/dyi167[published Online First: Epub Date]].
- 10  
11 13. Diez-Roux AV, Jacobs DR, Kiefe CI. Neighborhood characteristics and components of the insulin  
12  
13 resistance syndrome in young adults. *DIABETES CARE* 2002;**25**(11):1976-82
- 14  
15 14. Auchincloss AH, Diez Roux AV, Brown DG, O'Meara ES, Raghunathan TE. Association of  
16  
17 Insulin Resistance with Distance to Wealthy Areas. *AM J EPIDEMIOL* 2007;**165**(4):389-97
- 18  
19 15. Auchincloss AH, Diez Roux AV, Brown DG, Erdmann CA, Bertoni AG. Neighborhood resources  
20  
21 for physical activity and healthy foods and their association with insulin resistance.  
22  
23 *Epidemiology* 2008;**19**(1):146-57 doi: 10.1097/EDE.0b013e31815c480[published Online  
24  
25 First: Epub Date]].
- 26  
27 16. Schipf S, Werner A, Tamayo T, et al. Regional differences in the prevalence of known Type 2  
28  
29 diabetes mellitus in 45–74 years old individuals: Results from six population-based studies in  
30  
31 Germany (DIAB-CORE Consortium). *DIABET MED* 2012;**29**(7):88-95
- 32  
33 17. Müller G, Kluttig A, Greiser KH, et al. Regional and Neighborhood Disparities in the Odds of  
34  
35 Type 2 Diabetes: Results from Five Population-Based Studies in Germany (DIAB-CORE  
36  
37 Consortium). *AM J EPIDEMIOL* 2013; **in press**
- 38  
39 18. Maier W, Holle R, Hunger M, et al. The impact of regional deprivation and individual socio-  
40  
41 economic status on the prevalence of Type 2 diabetes in Germany. A pooled analysis of five  
42  
43 population-based studies. *Diabet Medicine* 2013;**30**(3):e78-e86
- 44  
45 19. Stafford M, Cummins S, Macintyre S, Ellaway A, Marmot M. Gender differences in the  
46  
47 associations between health and neighbourhood environment. *SOC SCI MED*  
48  
49 2005;**60**(8):1681-92
- 50  
51 20. Greiser K, Kluttig A, Schumann B, et al. Cardiovascular disease, risk factors and heart rate  
52  
53 variability in the elderly general population: Design and objectives of the CARdiovascular  
54  
55 disease, Living and Ageing in Halle (CARLA) Study. *BMC CARDIOVASC DISORD*  
56  
57 2005;**5**(1):33
- 58  
59  
60

- 1  
2  
3 21. Völzke H, Alte D, Schmidt CO, et al. Cohort Profile: The Study of Health in Pomerania. INT J  
4  
5 EPIDEMIOL 2011;**40**(2):294-307  
6  
7 22. Dragano N, Hoffmann B, Stang A, et al. Subclinical Coronary Atherosclerosis And  
8  
9 Neighbourhood Deprivation in an Urban Region. EUR J EPIDEMIOL 2009;**24**(1):25-35  
10  
11 23. Rathmann W, Haastert B, Icks A, et al. High prevalence of undiagnosed diabetes mellitus in  
12  
13 Southern Germany: Target populations for efficient screening. The KORA survey 2000.  
14  
15 Diabetologia 2003;**46**(2):182-89  
16  
17 24. Vennemann M, Hummel T, Berger K. The association between smoking and smell and taste  
18  
19 impairment in the general population. J NEUROL 2008;**255**(8):1121-26  
20  
21 25. Schunk M, Reitmeir P, Schipf S, et al. Health-related quality of life in subjects with and without  
22  
23 Type 2 diabetes: pooled analysis of five population-based surveys in Germany. DIABET  
24  
25 MED 2012;**29**(5):646-53  
26  
27 26. Breckenkamp J, Mielck A, Razum O. Health inequalities in Germany: do regional-level variables  
28  
29 explain differentials in cardiovascular risk? BMC PUBLIC HEALTH 2007;**7**(1):132  
30  
31 27. Dragano N, Bobak M, Wege N, et al. Neighbourhood socioeconomic status and cardiovascular  
32  
33 risk factors: a multilevel analysis of nine cities in the Czech Republic and Germany. BMC  
34  
35 PUBLIC HEALTH 2007;**7**(1):255  
36  
37 28. Cummins S, Stafford M, Macintyre S, Marmot M, Ellaway A. Neighbourhood environment and its  
38  
39 association with self rated health: evidence from Scotland and England. J EPIDEMIOL  
40  
41 COMMUNITY HEALTH 2005;**59**(3):207-13  
42  
43 29. van Lenthe FJ, Borrell LN, Costa G, et al. Neighbourhood unemployment and all cause mortality:  
44  
45 a comparison of six countries. Journal of Epidemiology and Community Health  
46  
47 2005;**59**(3):231-37 doi: 10.1136/jech.2004.022574[published Online First: Epub Date]].  
48  
49 30. Campbell DA, Radford JM, Burton P. Unemployment rates: an alternative to the Jarman index?  
50  
51 BRIT MED J 1991;**303**(6805):750-55 doi: 10.1136/bmj.303.6805.750[published Online First:  
52  
53 Epub Date]].  
54  
55  
56  
57  
58  
59  
60

- 1  
2  
3 31. Larsen K, Merlo J. Appropriate assessment of neighborhood effects on individual health:  
4 Integrating random and fixed effects in multilevel logistic regression. *AM J EPIDEMIOLOG*  
5 2005;**161**(1):81-88  
6  
7  
8  
9 32. Merlo J, Chaix B, Ohlsson H, et al. A brief conceptual tutorial of multilevel analysis in social  
10 epidemiology: using measures of clustering in multilevel logistic regression to investigate  
11 contextual phenomena. *J EPIDEMIOLOG COMMUNITY HEALTH* 2006;**60**(4):290-97  
12  
13  
14 33. Sterne JAC, Bradburn MJ, Egger M. Meta-analysis in Stata. In: Egger M, Smith GD, Altman DG,  
15 eds. *Systematic Reviews in Health Care. Meta-analysis in context*. London: BMJ, 1995.  
16  
17  
18 34. Huedo-Medina T, Sanchez-Meca J, Marin-Martinez F, Botella J. Assessing heterogeneity in meta-  
19 analysis: Q statistic or I<sup>2</sup> index? Center for Health, Intervention, and Prevention Documents  
20 2006;**Paper 19**  
21  
22  
23  
24 35. Arber S, Gilbert GN, Dale A. Paid employment and women's health: a benefit or a source of role  
25 strain? *SOCIOL HEALTH ILL* 1985;**7**(3):375-400  
26  
27  
28 36. Repetti RL, Matthews KA, Waldron I. Employment and women's health: Effects of paid  
29 employment on women's mental and physical health. *AM PSYCHOL* 1989;**44**(11):1394-401  
30  
31  
32 37. Krishnan S, Cozier YC, Rosenberg L, Palmer JR. Socioeconomic Status and Incidence of Type 2  
33 Diabetes: Results From the Black Women's Health Study. *American Journal of Epidemiology*  
34 2010;**171**(5):564-70 doi: 10.1093/aje/kwp443[published Online First: Epub Date].  
35  
36  
37 38. King T, Kavanagh AM, Jolley D, Turrell G, Crawford D. Weight and place: a multilevel cross-  
38 sectional survey of area-level social disadvantage and overweight//obesity in Australia. *INT J*  
39 *OBES* 2005;**30**(2):281-87  
40  
41  
42 39. Robert SA, Reither EN. A multilevel analysis of race, community disadvantage, and body mass  
43 index among adults in the US. *SOC SCI MED* 2004;**59**(12):2421-34  
44  
45  
46 40. MacIntyre S, Hunt K. Socio-economic Position, Gender and Health. *Journal of Health Psychology*  
47 1997;**2**(3):315-34  
48  
49  
50 41. Okura Y, Urban LH, Mahoney DW, Jacobsen SJ, Rodeheffer RJ. Agreement between self-report  
51 questionnaires and medical record data was substantial for diabetes, hypertension, myocardial  
52 infarction and stroke but not for heart failure. *J CLIN EPIDEMIOLOG* 2004;**57**(10):1096-103  
53  
54  
55  
56  
57  
58  
59  
60



- 1  
2  
3 42. Jackson JM, DeFor TA, Crain AL, et al. Self-reported diabetes is a valid outcome in pragmatic  
4  
5 clinical trials and observational studies. *Journal of Clinical Epidemiology* 2013;**66**(3):349-50  
6  
7 43. Kawachi I, Berkman LF. Introduction. In: Kawachi I, Berkman LF, eds. *Neighborhoods and*  
8  
9 *Health*. Oxford: Oxford University Press, 2003.  
10  
11 44. Diez Roux AV. Estimating neighborhood health effects: the challenges of causal inference in a  
12  
13 complex world. *SOC SCI MED* 2004;**58**(10):1953-60  
14  
15 45. Sampson RJ. Neighborhood-Level Context and Health: Lessons from Sociology. In: Kawachi I,  
16  
17 Berkman LF, eds. *Neighborhoods and Health*. Oxford: Oxford University Press, 2003.  
18  
19 46. Yen IH, Kaplan GA. Neighborhood social environment and risk of death: Multilevel evidence  
20  
21 from the Alameda County Study. *AM J EPIDEMIOL* 1999;**149**(10):898-907  
22  
23  
24  
25  
26  
27  
28  
29  
30  
31  
32  
33  
34  
35  
36  
37  
38  
39  
40  
41  
42  
43  
44  
45  
46  
47  
48  
49  
50  
51  
52  
53  
54  
55  
56  
57  
58  
59  
60

Figure 1: Meta Analysis of Five Logistic Regressions of Type 2 Diabetes Mellitus for the Social Class Score (Range: 2-14 Points) in Women and Men <sup>a, b, c, d</sup>

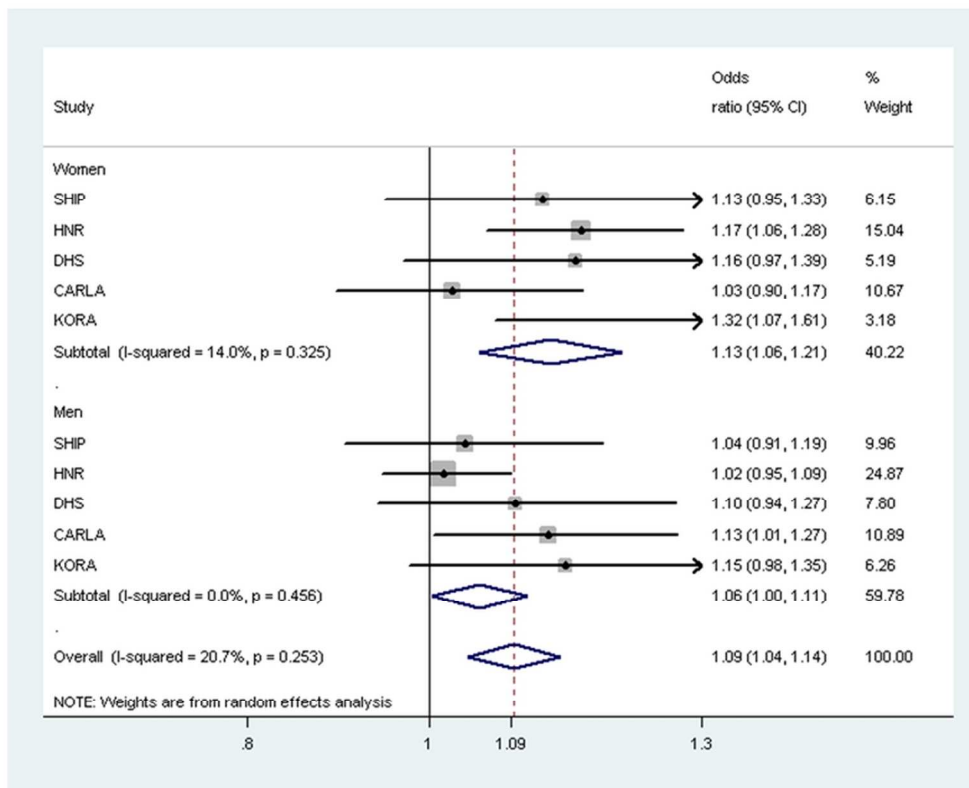

99x90mm (300 x 300 DPI)

only

## Online Supplemental Material

Table 5: Model Parameter derived from 3-Level Mixed Effects Regression of Type 2 Diabetes

|                | Women          |      |                |      | Men            |      |                |      |
|----------------|----------------|------|----------------|------|----------------|------|----------------|------|
|                | Neighborhood   |      | Study Region   |      | Neighborhood   |      | Study Region   |      |
|                | V <sub>A</sub> | MOR  |
| <b>Model 1</b> | 0.16<br>(0.10) | 1.47 | 0.08<br>(0.07) | 1.31 | 0.00<br>(0.00) | 1.00 | 0.04<br>(0.03) | 1.20 |
| <b>Model 2</b> | 0.15<br>(0.10) | 1.45 | 0.07<br>(0.06) | 1.30 | 0.00<br>(0.00) | 1.00 | 0.02<br>(0.02) | 1.15 |
| <b>Model 3</b> | 0.15<br>(0.10) | 1.45 | 0.07<br>(0.06) | 1.29 | 0.00<br>(0.00) | 1.00 | 0.02<br>(0.02) | 1.13 |
| <b>Model 4</b> | 0.14<br>(0.09) | 1.42 | 0.08<br>(0.07) | 1.32 | 0.00<br>(0.00) | 1.00 | 0.00<br>(0.01) | 1.05 |
| <b>Model 5</b> | 0.08<br>(0.09) | 1.32 | 0.07<br>(0.06) | 1.29 | 0.00<br>(0.00) | 1.00 | 0.00<br>(0.00) | 1.00 |

<sup>d</sup> Model 1: unadjusted

<sup>e</sup> Model 2: adjusted by age

<sup>f</sup> Model 3: adjusted by age, social class, employment status, marital status

<sup>f</sup> Model 4: adjusted by age, social class, employment status, marital status, neighborhood unemployment rate

<sup>g</sup> Model 5: additionally adjusted by mediators: BMI, physical exercise, smoking (only for men)

STROBE 2007 (v4) Statement—Checklist of items that should be included in reports of *cross-sectional studies*

| Section/Topic                | Item # | Recommendation                                                                                                                                                                       | Reported on page # |
|------------------------------|--------|--------------------------------------------------------------------------------------------------------------------------------------------------------------------------------------|--------------------|
| Title and abstract           | 1      | (a) Indicate the study's design with a commonly used term in the title or the abstract                                                                                               | 2                  |
|                              |        | (b) Provide in the abstract an informative and balanced summary of what was done and what was found                                                                                  | 2                  |
| <b>Introduction</b>          |        |                                                                                                                                                                                      |                    |
| Background/rationale         | 2      | Explain the scientific background and rationale for the investigation being reported                                                                                                 | 5                  |
| Objectives                   | 3      | State specific objectives, including any prespecified hypotheses                                                                                                                     | 5                  |
| <b>Methods</b>               |        |                                                                                                                                                                                      |                    |
| Study design                 | 4      | Present key elements of study design early in the paper                                                                                                                              | 6                  |
| Setting                      | 5      | Describe the setting, locations, and relevant dates, including periods of recruitment, exposure, follow-up, and data collection                                                      | 6                  |
| Participants                 | 6      | (a) Give the eligibility criteria, and the sources and methods of selection of participants                                                                                          | 6                  |
| Variables                    | 7      | Clearly define all outcomes, exposures, predictors, potential confounders, and effect modifiers. Give diagnostic criteria, if applicable                                             | 6-7                |
| Data sources/<br>measurement | 8*     | For each variable of interest, give sources of data and details of methods of assessment (measurement). Describe comparability of assessment methods if there is more than one group | 6-7                |
| Bias                         | 9      | Describe any efforts to address potential sources of bias                                                                                                                            | 8                  |
| Study size                   | 10     | Explain how the study size was arrived at                                                                                                                                            | 6                  |
| Quantitative variables       | 11     | Explain how quantitative variables were handled in the analyses. If applicable, describe which groupings were chosen and why                                                         | 6-7                |
| Statistical methods          | 12     | (a) Describe all statistical methods, including those used to control for confounding                                                                                                | 7-8                |
|                              |        | (b) Describe any methods used to examine subgroups and interactions                                                                                                                  | 7                  |
|                              |        | (c) Explain how missing data were addressed                                                                                                                                          | 6                  |
|                              |        | (d) If applicable, describe analytical methods taking account of sampling strategy                                                                                                   | -                  |
|                              |        | (e) Describe any sensitivity analyses                                                                                                                                                | 8                  |
| <b>Results</b>               |        |                                                                                                                                                                                      |                    |

|                          |     |                                                                                                                                                                                                              |                   |
|--------------------------|-----|--------------------------------------------------------------------------------------------------------------------------------------------------------------------------------------------------------------|-------------------|
| Participants             | 13* | (a) Report numbers of individuals at each stage of study—eg numbers potentially eligible, examined for eligibility, confirmed eligible, included in the study, completing follow-up, and analysed            | 6/8               |
|                          |     | (b) Give reasons for non-participation at each stage                                                                                                                                                         | 6                 |
|                          |     | (c) Consider use of a flow diagram                                                                                                                                                                           | -                 |
| Descriptive data         | 14* | (a) Give characteristics of study participants (eg demographic, clinical, social) and information on exposures and potential confounders                                                                     | 8/15 (table 2)    |
|                          |     | (b) Indicate number of participants with missing data for each variable of interest                                                                                                                          | 6                 |
| Outcome data             | 15* | Report numbers of outcome events or summary measures                                                                                                                                                         | 15                |
| Main results             | 16  | (a) Give unadjusted estimates and, if applicable, confounder-adjusted estimates and their precision (eg, 95% confidence interval). Make clear which confounders were adjusted for and why they were included | 8-10/17 (table 3) |
|                          |     | (b) Report category boundaries when continuous variables were categorized                                                                                                                                    | 6                 |
|                          |     | (c) If relevant, consider translating estimates of relative risk into absolute risk for a meaningful time period                                                                                             | -                 |
| Other analyses           | 17  | Report other analyses done—eg analyses of subgroups and interactions, and sensitivity analyses                                                                                                               | 10                |
| <b>Discussion</b>        |     |                                                                                                                                                                                                              |                   |
| Key results              | 18  | Summarise key results with reference to study objectives                                                                                                                                                     | 11-12             |
| Limitations              | 19  | Discuss limitations of the study, taking into account sources of potential bias or imprecision. Discuss both direction and magnitude of any potential bias                                                   | 13                |
| Interpretation           | 20  | Give a cautious overall interpretation of results considering objectives, limitations, multiplicity of analyses, results from similar studies, and other relevant evidence                                   | 12                |
| Generalisability         | 21  | Discuss the generalisability (external validity) of the study results                                                                                                                                        | 12                |
| <b>Other information</b> |     |                                                                                                                                                                                                              |                   |
| Funding                  | 22  | Give the source of funding and the role of the funders for the present study and, if applicable, for the original study on which the present article is based                                                | 25                |

\*Give information separately for cases and controls in case-control studies and, if applicable, for exposed and unexposed groups in cohort and cross-sectional studies.

**Note:** An Explanation and Elaboration article discusses each checklist item and gives methodological background and published examples of transparent reporting. The STROBE checklist is best used in conjunction with this article (freely available on the Web sites of PLoS Medicine at <http://www.plosmedicine.org/>, Annals of Internal Medicine at <http://www.annals.org/>, and Epidemiology at <http://www.epidem.com/>). Information on the STROBE Initiative is available at [www.strobe-statement.org](http://www.strobe-statement.org).
